# Supplementary material for: Triphenylphosphine-assisted dehydroxylative Csp3–N bond formation via electrochemical oxidation
Source: Royal Society of Chemistry journal article supplement (doi:10.1039/c9cc08622f), 2019-01-01

Electronic Supplementary Information for

**Triphenylphosphine-assisted dehydroxylative Csp<sup>3</sup>-N bond formation via electrochemical oxidation**

Zhimin Xu, Yue Zheng, Zihui Wang, Xiaoqing Shao, Lifang Tian,\* and Yahui Wang\*

Institute of Advanced Synthesis (IAS), School of Chemistry and Molecular Engineering, Nanjing Tech University, Nanjing 211816, China

Contents

|                                                                                       |    |
|---------------------------------------------------------------------------------------|----|
| 1. General information .....                                                          | 1  |
| 2. Experimental procedures.....                                                       | 1  |
| 2.1 Electrode materials and dimensions .....                                          | 1  |
| 2.2 General procedure for the dehydroxylative Csp <sup>3</sup> -N bond formation..... | 2  |
| 3. Detail descriptions for products .....                                             | 3  |
| 4. Procedure for cyclic voltammetry (CV).....                                         | 19 |
| 5. <sup>1</sup> H and <sup>13</sup> C NMR spectra.....                                | 21 |

## 1. General information

Reagents were purchased at the highest commercial quality grade and used without further purification, unless otherwise stated. Yields refer to chromatographically and spectroscopically ( $^1\text{H}$  NMR) homogeneous material, unless otherwise stated. Reactions were monitored by thin layer chromatography (TLC) carried out on 0.25 mm E. Merck silica plates (60F-254), using UV light (254 nm) and TLC stain with anisaldehyde-sulfuric acid for visualization. Flash chromatography columns were packed with 200-300 mesh silica gel in petroleum (bp. 60-90 °C).  $^1\text{H}$  and  $^{13}\text{C}$  NMR data were recorded with Bruker (400 MHz) or Jeol (400 MHz) spectrometers with tetramethylsilane as an internal standard. All chemical shifts ( $\delta$ ) are reported in ppm and coupling constants ( $J$ ) in Hz. All chemical shifts were reported relative to tetramethylsilane (0 ppm for  $^1\text{H}$ ),  $\text{CDCl}_3$  (77.0 ppm for  $^{13}\text{C}$ ). It is worth to mention that two rotamers of the products were normally observed in 2-substituted *N*-Boc-pyrrolidine derivatives.<sup>1</sup>

## 2. Experimental procedures

### 2.1 Electrode materials and dimensions

The instrument for undivided electrolysis is IKA<sup>®</sup> ElectraSyn 2.0 with carousel. The electrodes used in IKA<sup>®</sup> ElectraSyn 2.0 were purchased from IKA Company. The anodic electrode was the carbon electrode (3.0 cm  $\times$  0.8 cm  $\times$  0.2 cm) (3.0 cm is the height of the electrode immersed in the solution) and the cathodic electrode was the nickel plate (3.0 cm  $\times$  0.8 cm  $\times$  0.2 cm).

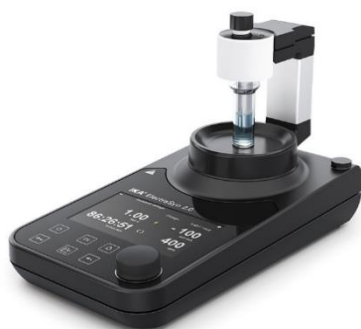

IKA ElectraSyn 2.0

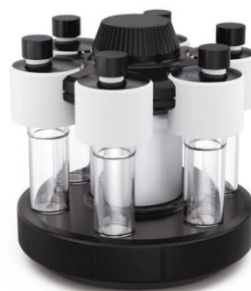

IKA Carousel complete

Cyclic voltammograms were recorded on an electrochemical workstation CS150H (CorrTest<sup>®</sup>). A steady glassy carbon disk electrode (3 mm in diameter) was used as the working electrode; a platinum plate was

<sup>1</sup> a) R. E. Gawley, G. Barolli, S. Madan, M. Saverina, S. O'Connor, *Tetrahedron Lett.* **2004**, 45, 1759–1761; b) C. P. Johnston, R. T. Smith, S. Allmendinger, D. W. C. MacMillan, *Nature* **2016**, 536, 322–325; c) F. L. Vaillant, M. D. Wodrich, and J. Waser, *Chem. Sci.* **2017**, 8, 1790–1800; d) D. C. Marcote, R. Street-Jeakings, E. Dauncey, J. J. Douglas, A. Ruffoni, D. Leonori, *Org. Biomol. Chem.* **2019**, 17, 1839–1842.

used as the counter electrode; the reference was an Ag/AgNO<sub>3</sub> electrode with (0.01 M) AgNO<sub>3</sub> in acetonitrile.

## 2.2 General procedure for the dehydroxylative Csp<sup>3</sup> – N bond formation

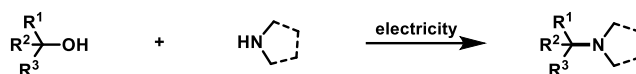

The electrolysis was carried out in the electrolysis cell of IKA<sup>®</sup> ElectraSyn 2.0. The anodic electrode was the carbon electrode (3.0 cm × 0.8 cm × 0.2 cm) and the cathodic electrode was the nickel plate (3.0 cm × 0.8 cm × 0.2 cm). Azoles or amides (0.3 mmol), <sup>n</sup>Bu<sub>4</sub>NPF<sub>6</sub> (78 mg, 0.2 mmol), alcohol (0.4 mmol), PPh<sub>3</sub> (105 mg, 0.4 mmol) and MeCN (8 mL) were added to an oven-dried undivided cell (10 mL) equipped with a stirring bar (the order of the addition did not affect the result). The reaction mixture was stirred and electrolyzed at a constant current of 7 mA at room temperature for 3 h. When the reaction was finished, the solvent was evaporated under vacuum and the crude material was purified by column chromatography or preparative TLC to furnish the desired product.

**Table S1. Optimization of the reaction conditions<sup>a</sup>**

| Entry <sup>a</sup> | Electrode    | Supporting electrolyte                         | PR <sub>3</sub>                | Yield <sup>b</sup> |
|--------------------|--------------|------------------------------------------------|--------------------------------|--------------------|
| 1                  | C(+)   Ni(-) | <sup>n</sup> Bu <sub>4</sub> NPF <sub>6</sub>  | PPh <sub>3</sub>               | 80%                |
| 2                  | C(+)   C(-)  | <sup>n</sup> Bu <sub>4</sub> NPF <sub>6</sub>  | PPh <sub>3</sub>               | 61%                |
| 3                  | C(+)   Ni(-) | Et <sub>4</sub> NPF <sub>6</sub>               | PPh <sub>3</sub>               | 84%                |
| 4                  | C(+)   Ni(-) | <sup>n</sup> Bu <sub>4</sub> NClO <sub>4</sub> | PPh <sub>3</sub>               | 83%                |
| 5                  | C(+)   Ni(-) | Et <sub>4</sub> NClO <sub>4</sub>              | PPh <sub>3</sub>               | 84%                |
| 6                  | C(+)   Ni(-) | <sup>n</sup> Bu <sub>4</sub> NOAc              | PPh <sub>3</sub>               | 24%                |
| 7                  | C(+)   Ni(-) | <sup>n</sup> Bu <sub>4</sub> NBr               | PPh <sub>3</sub>               | 94%                |
| 8                  | C(+)   Ni(-) | <sup>n</sup> Bu <sub>4</sub> NPF <sub>6</sub>  | <sup>n</sup> Bu <sub>3</sub> P | 75%                |
| 9                  | C(+)   Ni(-) | <sup>n</sup> Bu <sub>4</sub> NPF <sub>6</sub>  | <sup>t</sup> Bu <sub>3</sub> P | 78%                |

|    |              |                                           |                               |     |
|----|--------------|-------------------------------------------|-------------------------------|-----|
| 10 | C(+)   Ni(-) | <i>n</i> Bu <sub>4</sub> NPF <sub>6</sub> | Tricyclohexyl Phosphine       | 88% |
| 11 | C(+)   Ni(-) | <i>n</i> Bu <sub>4</sub> NPF <sub>6</sub> | Tris(4-fluorophenyl)Phosphine | 95% |

<sup>a</sup> Reaction conditions: **1a** (0.4 mmol), **2a** (0.3 mmol), PPh<sub>3</sub> (0.4 mmol), supporting electrolyte (0.025 M), 8 mL MeCN, 23 °C, constant current electrolysis for 3 h, open air. <sup>b</sup> Isolated yields after chromatography were reported.

### Comparing experiments with acids.

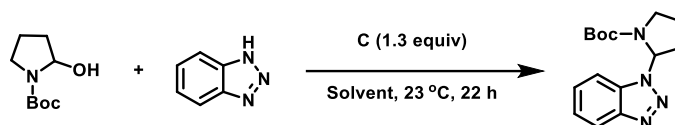

The starting *tert*-butyl 2-hydroxypyrrolidine-1-carboxylate (75 mg, 0.4 mmol) was reacted with 1*H*-benzo[*d*][1,2,3]triazole (36 mg, 0.30 mmol) and **C** (0.4 mmol) at room temperature for 22 hours. Water (10 mL) was added to the reaction mixture and extracted with ethyl acetate or dichloromethane (10 mL x 3). The crude product was purified by column chromatography (petroleum ether/ethyl acetate = 10:1) to afford the title compound.

| C                                 | MeCN | DCM |
|-----------------------------------|------|-----|
| BF <sub>3</sub> Et <sub>2</sub> O | -    | -   |
| AlCl <sub>3</sub>                 | -    | -   |
| HOAc                              | 56%  | 35% |
| CF <sub>3</sub> CO <sub>2</sub> H | 64%  | 65% |

### 3. Detail descriptions for products

#### *Tert*-butyl 2-(1*H*-indazol-1-yl)pyrrolidine-1-carboxylate (**3a**)

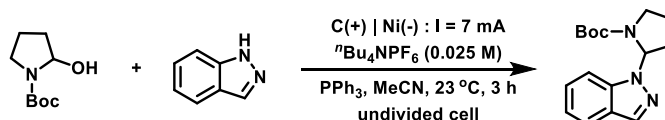

The starting *tert*-butyl 2-hydroxypyrrolidine-1-carboxylate (75 mg, 0.4 mmol) was reacted with 1*H*-indazole (36 mg, 0.30 mmol) and PPh<sub>3</sub> (105 mg, 0.4 mmol) according to General Procedure. Water (10 mL) was added to the reaction mixture and extracted with ethyl acetate (10 mL × 3). The crude product was purified

by column chromatography (petroleum ether/ethyl acetate = 10:1) to afford the title compound as a colorless oil in 96% yield (83 mg).

Rf (petroleum ether/ethyl acetate = 3:1): 0.3; **<sup>1</sup>H NMR** (400 MHz, CDCl<sub>3</sub>) (rotameric mixture) δ (ppm): 8.01 (s, 1H), 7.80 – 7.45 (m, 2H), 7.41 – 7.31 (m, 1H), 7.13 (t, *J* = 7.5 Hz, 1H), 6.57 – 6.26 (m, 1H), 3.97 – 3.45 (m, 2H), 2.70 – 1.95 (m, 4H), 1.52 – 1.03 (m, 9H). **<sup>13</sup>C NMR** (100 MHz, CDCl<sub>3</sub>) (rotameric mixture) δ (ppm): 154.2, 153.5, 145.1, 139.4, 138.8, 133.5, 126.1, 125.8, 123.5, 120.7, 120.4, 109.8, 109.3, 79.9, 79.7, 69.9, 69.5, 46.5, 33.9, 32.5, 28.1, 27.9, 23.6, 22.6. **HRMS m/z (ESI)** calcd for C<sub>16</sub>H<sub>22</sub>N<sub>3</sub>O<sub>2</sub> ([M+H]<sup>+</sup>) 288.1707, found 288.1716.

Procedure for gram-scale synthesis: The electrolysis was carried out in the electrolysis cell of IKA<sup>®</sup> ElectraSyn 2.0. The anodic electrode was the carbon electrode (3.0 cm × 0.8 cm × 0.2 cm) and the cathodic electrode was the nickel plate (3.0 cm × 0.8 cm × 0.2 cm). According to General Procedure, starting *tert*-butyl 2-hydroxypyrrolidine-1-carboxylate (1.5 g, 80 mmol) was reacted with 1*H*-indazole (720 mg, 60 mmol) and PPh<sub>3</sub> (2.1 g, 80 mmol) were added to an oven-dried undivided cell (10 mL) equipped with a stirring bar. The reaction mixture was stirred and electrolyzed at a constant current of 15 mA at room temperature for 24 h. Solvent was evaporated under vacuum and the crude material was purified by column chromatography (petroleum ether/ethyl acetate = 10:1) to afford the title compound as a colorless oil in 94% yield (1.62 g).

### *Tert*-butyl 2-(4-nitro-1*H*-pyrazol-1-yl)pyrrolidine-1-carboxylate (3b)

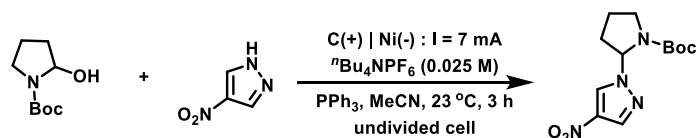

The starting *tert*-butyl 2-hydroxypyrrolidine-1-carboxylate (75 mg, 0.4 mmol) was reacted with 4-nitro-1*H*-pyrazole (34 mg, 0.30 mmol) and PPh<sub>3</sub> (105 mg, 0.4 mmol) according to General Procedure. Water (10 mL) was added to the reaction mixture and extracted with ethyl acetate (10 mL × 3). The crude product was purified by column chromatography (petroleum ether/ethyl acetate = 10:1) to afford the title compound as a white solid in 98% yield (83 mg).

Rf (petroleum ether/ethyl acetate = 3:1): 0.3; **<sup>1</sup>H NMR** (400 MHz, CDCl<sub>3</sub>) (rotameric mixture) δ (ppm): 8.37 – 8.15 (m, 1H), 8.14 – 7.99 (m, 1H), 6.06 – 5.86 (m, 1H), 3.76 – 3.36 (m, 2H), 2.48 – 1.96 (m, 4H), 1.48 – 1.31 (m, 9H). **<sup>13</sup>C NMR** (100 MHz, CDCl<sub>3</sub>) (rotameric mixture) δ (ppm): 154.1, 152.9, 135.8, 135.2, 128.3,

127.2, 81.4, 81.1, 74.6, 74.3, 46.9, 46.6, 33.2, 31.7, 28.1, 23.1, 22.0. **HRMS m/z (ESI)** calcd for  $C_{12}H_{19}N_4O_4$  ( $[M+H]^+$ ) 283.1401, found 283.1405.

### ***Tert*-butyl 2-(4-nitro-1*H*-pyrazol-1-yl)piperidine-1-carboxylate (3c)**

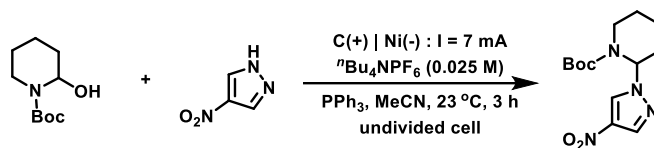

The starting *tert*-butyl 2-hydroxypiperidine-1-carboxylate (80 mg, 0.4 mmol) was reacted with 4-nitro-1*H*-pyrazole (34 mg, 0.30 mmol) and  $PPh_3$  (105 mg, 0.4 mmol) according to General Procedure. Water (10 mL) was added to the reaction mixture and extracted with ethyl acetate (10 mL  $\times$  3). The crude product was purified by column chromatography (petroleum ether/ethyl acetate = 10:1) to afford the title compound as a white solid in 76% yield (68 mg).

Rf (petroleum ether/ethyl acetate = 3:1): 0.3;  **$^1H$  NMR** (400 MHz,  $CDCl_3$ )  $\delta$  (ppm): 8.17 (s, 1H), 8.09 (s, 1H), 6.31 (br s, 1H), 4.14 – 3.97 (m, 1H), 2.99 – 2.88 (m, 1H), 2.60 – 2.55 (m, 1H), 2.02 – 1.91 (m, 1H), 1.80 – 1.56 (m, 4H), 1.48 (s, 9H).  **$^{13}C$  NMR** (100 MHz,  $CDCl_3$ )  $\delta$  (ppm): 154.6, 135.8, 135.4, 127.6, 81.7, 67.9, 40.1, 28.2, 27.7, 24.0, 18.2. **HRMS m/z (ESI)** calcd for  $C_{13}H_{21}N_4O_4$  ( $[M+H]^+$ ) 297.1557, found 297.1562.

### **2-(4-nitro-1*H*-pyrazol-1-yl)cycloheptan-1-ol (3d)**

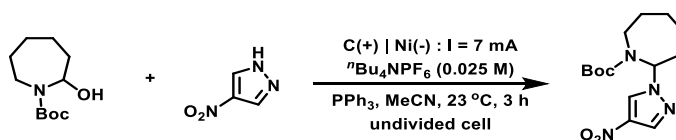

The starting *tert*-butyl 2-hydroxycycloheptan-1-carboxylate (86 mg, 0.4 mmol) was reacted with 4-nitro-1*H*-pyrazole (34 mg, 0.30 mmol) and  $PPh_3$  (105 mg, 0.4 mmol) according to General Procedure. Water (10 mL) was added to the reaction mixture and extracted with ethyl acetate (10 mL  $\times$  3). The crude product was purified by column chromatography (petroleum ether/ethyl acetate = 10:1) to afford the title compound as a white solid in 74% yield (50 mg).

Rf (petroleum ether/ethyl acetate = 3:1): 0.3;  **$^1H$  NMR** (400 MHz,  $CDCl_3$ ) (rotameric mixture)  $\delta$  (ppm): 8.38 – 8.13 (m, 1H), 8.12 – 8.00 (m, 1H), 6.26 – 5.98 (m, 1H), 4.06 – 3.72 (m, 1H), 3.34 – 3.20 (m, 1H), 2.51 – 2.26 (m, 2H), 2.01 – 1.36 (m, 15H).  **$^{13}C$  NMR** (100 MHz,  $CDCl_3$ ) (rotameric mixture)  $\delta$  (ppm): 155.5, 154.0, 135.6, 135.2, 128.4, 127.0, 81.7, 81.1, 73.5, 72.0, 42.9, 42.5, 33.4, 32.3, 29.3, 29.1, 29.1, 28.2, 28.2, 23.8, 23.6. **HRMS m/z (ESI)** calcd for  $C_{13}H_{21}N_4O_4$  ( $[M+H]^+$ ) 377.1714, found 377.1721.

### 2-bromo-1-(4-nitro-1*H*-pyrazol-1-yl)isoindoline (3e)

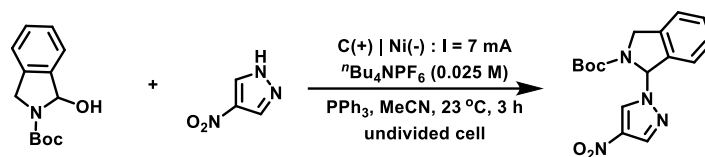

The starting 2-bromoisoindolin-1-ol (86 mg, 0.4 mmol) was reacted with 4-nitro-1*H*-pyrazole (34 mg, 0.30 mmol) and  $\text{PPh}_3$  (105 mg, 0.4 mmol) according to General Procedure. Water (10 mL) was added to the reaction mixture and extracted with ethyl acetate (10 mL  $\times$  3). The crude product was purified by column chromatography (petroleum ether/ethyl acetate = 10:1) to afford the title compound as a white solid in 78% yield (72 mg).

Rf (petroleum ether/ethyl acetate = 3:1): 0.2;  **$^1\text{H}$  NMR** (400 MHz,  $\text{CDCl}_3$ ) (rotameric mixture)  $\delta$  (ppm): 8.44 – 8.16 (m, 1H), 8.11 – 8.00 (m, 1H), 7.51 – 7.27 (m, 4H), 7.15 – 6.98 (m, 1H), 4.94 – 4.77 (m, 2H), 1.55 – 1.38 (m, 9H).  **$^{13}\text{C}$  NMR** (100 MHz,  $\text{CDCl}_3$ ) (rotameric mixture)  $\delta$  (ppm): 166.6, 150.4, 140.6, 133.4, 131.4, 128.4, 124.9, 123.0, 83.1, 49.1, 28.1. **HRMS  $m/z$  (ESI)** calcd for  $\text{C}_{16}\text{H}_{19}\text{N}_4\text{O}_4$  ( $[\text{M}+\text{H}]^+$ ) 331.1401, found 331.1403.

### *Tert*-butyl (1-(4-nitro-1*H*-pyrazol-1-yl)hexyl)carbamate (3f)

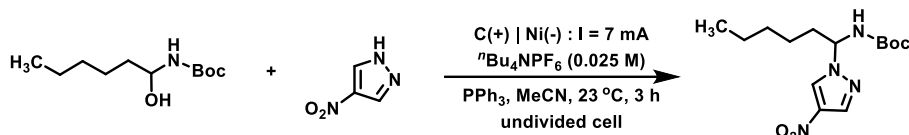

The starting *tert*-butyl (1-hydroxyhexyl)carbamate (87 mg, 0.4 mmol) was reacted with 4-nitro-1*H*-pyrazole (34 mg, 0.30 mmol) and  $\text{PPh}_3$  (105 mg, 0.4 mmol) according to General Procedure. Water (10 mL) was added to the reaction mixture and extracted with ethyl acetate (10 mL  $\times$  3). The crude product was purified by column chromatography (petroleum ether/ethyl acetate = 10:1) to afford the title compound as a colorless oil in 49% yield (46 mg).

Rf (petroleum ether/ethyl acetate = 3:1): 0.2;  **$^1\text{H}$  NMR** (400 MHz,  $\text{CDCl}_3$ )  $\delta$  (ppm): 8.32 (s, 1H), 8.11 (s, 1H), 5.78 – 5.51 (m, 2H), 2.20 – 1.93 (m, 2H), 1.45 – 1.40 (m, 9H), 1.37 – 1.26 (m, 6H), 0.92 – 0.84 (m, 3H).  **$^{13}\text{C}$  NMR** (100 MHz,  $\text{CDCl}_3$ )  $\delta$  (ppm): 174.2, 171.1, 150.1, 82.7, 60.3, 46.4, 32.9, 27.9, 20.9, 17.3, 14.1. **HRMS  $m/z$  (ESI)** calcd for  $\text{C}_{14}\text{H}_{25}\text{N}_4\text{O}_4$  ( $[\text{M}+\text{H}]^+$ ) 313.1870, found 313.1872.

### 4-nitro-1-(tetrahydro-2*H*-pyran-2-yl)-1*H*-pyrazole (3g)

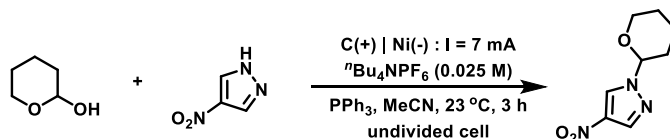

The starting tetrahydro-2*H*-pyran-2-ol (40.8 mg, 0.4 mmol) was reacted with 4-nitro-1*H*-pyrazole (34 mg, 0.30 mmol) and PPh<sub>3</sub> (105 mg, 0.4 mmol) according to General Procedure. Water (10 mL) was added to the reaction mixture and extracted with ethyl acetate (10 mL × 3). The crude product was purified by column chromatography (petroleum ether/ethyl acetate = 100:1) to afford the title compound as a colorless oil in 51% yield (30 mg).

R<sub>f</sub> (petroleum ether/ethyl acetate = 10:1): 0.3; <sup>1</sup>H NMR (400 MHz, CDCl<sub>3</sub>) δ (ppm): 8.34 (s, 1H), 8.07 (s, 1H), 5.44 – 5.35 (m, 1H), 4.12 – 3.66 (m, 2H), 2.22 – 1.60 (m, 6H). <sup>13</sup>C NMR (100 MHz, CDCl<sub>3</sub>) δ (ppm): 135.4, 126.9, 88.3, 67.7, 30.6, 24.6, 21.5. HRMS *m/z* (ESI) calcd for C<sub>8</sub>H<sub>12</sub>N<sub>3</sub>O<sub>3</sub> ([M+H]<sup>+</sup>) 198.0873, found 198.0870.

### 3,5-diphenyl-1-(tetrahydro-2*H*-pyran-2-yl)-1*H*-pyrazole (3h)

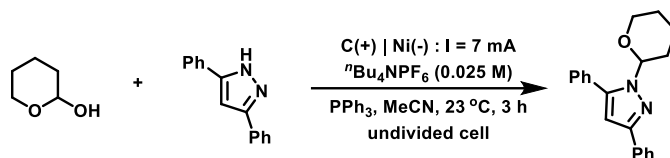

The starting tetrahydro-2*H*-pyran-2-ol (40.8 mg, 0.4 mmol) was reacted with 3,5-diphenyl-1*H*-pyrazole (66 mg, 0.30 mmol) and PPh<sub>3</sub> (105 mg, 0.4 mmol) according to General Procedure. Water (10 mL) was added to the reaction mixture and extracted with ethyl acetate (10 mL × 3). The crude product was purified by column chromatography (petroleum ether/ethyl acetate = 100:1) to afford the title compound as a colorless oil in 61% yield (56 mg).

R<sub>f</sub> (petroleum ether/ethyl acetate = 10:1): 0.4; <sup>1</sup>H NMR (400 MHz, CDCl<sub>3</sub>) δ (ppm): 7.92 – 7.86 (m, 1H), 7.61 – 7.56 (m, 1H), 7.52 – 7.27 (m, 6H), 6.65 (s, 1H), 5.26 – 5.20 (m, 1H), 4.21 – 4.14 (m, 1H), 3.68 – 3.59 (m, 1H), 2.76 – 2.64 (m, 1H), 2.15 – 2.05 (m, 1H), 1.92 – 1.59 (m, 4H). <sup>13</sup>C NMR (100 MHz, CDCl<sub>3</sub>) δ (ppm): 151.1, 145.5, 133.3, 130.4, 129.0, 128.6, 128.4, 127.7, 125.8, 103.7, 84.4, 67.7, 29.7, 24.8, 22.9. HRMS *m/z* (ESI) calcd for C<sub>20</sub>H<sub>21</sub>N<sub>2</sub>O ([M+H]<sup>+</sup>) 305.1648, found 305.1652.

### 1-(tetrahydro-2*H*-pyran-2-yl)-1*H*-indazole (3i)

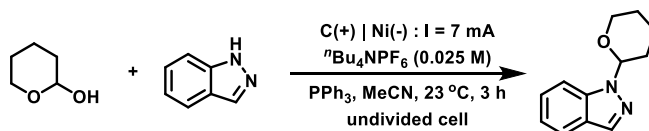

The starting tetrahydro-2*H*-pyran-2-ol (40.8 mg, 0.4 mmol) was reacted with 1*H*-indazole (36 mg, 0.30 mmol) and PPh<sub>3</sub> (105 mg, 0.4 mmol) according to General Procedure. Water (10 mL) was added to the reaction mixture and extracted with ethyl acetate (10 mL × 3). The crude product was purified by column chromatography (petroleum ether/ethyl acetate = 100:1) to afford the title compound as a colorless oil in 60% yield (37 mg).

Rf (petroleum ether/ethyl acetate = 10:1): 0.3; <sup>1</sup>H NMR (400 MHz, CDCl<sub>3</sub>) δ (ppm): 8.15 (s, 1H), 7.72 (d, *J* = 8.8 Hz, 1H), 7.66 (d, *J* = 8.5 Hz, 1H), 7.31 – 7.25 (m, 1H), 7.11 – 7.04 (m, 1H), 5.72 – 5.64 (m, 1H), 4.18 – 3.74 (m, 2H), 2.28 – 2.16 (m, 2H), 2.11 – 1.61 (m, 4H). <sup>13</sup>C NMR (100 MHz, CDCl<sub>3</sub>) δ (ppm): 148.5, 126.2, 121.8, 121.4, 120.9, 120.5, 117.8, 88.9, 67.9, 31.4, 24.9, 22.1. HRMS *m/z* (ESI) calcd for C<sub>12</sub>H<sub>15</sub>N<sub>2</sub>O ([M+H]<sup>+</sup>) 203.1179, found 203.1182.

### 5-phenyl-2-(tetrahydro-2*H*-pyran-2-yl)-2*H*-tetrazole (3j)

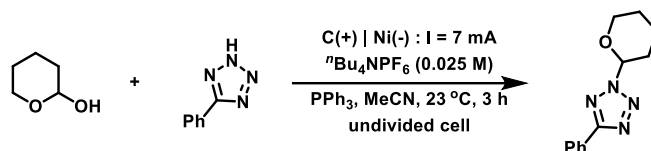

The starting tetrahydro-2*H*-pyran-2-ol (40.8 mg, 0.4 mmol) was reacted with 5-phenyl-2*H*-tetrazole (44 mg, 0.30 mmol) and PPh<sub>3</sub> (105 mg, 0.4 mmol) according to General Procedure. Water (10 mL) was added to the reaction mixture and extracted with ethyl acetate (10 mL × 3). The crude product was purified by column chromatography (petroleum ether/ethyl acetate = 50:1) to afford the title compound as a colorless oil in 70% yield (48.3 mg).

Rf (petroleum ether/ethyl acetate = 10:1): 0.2; <sup>1</sup>H NMR (400 MHz, CDCl<sub>3</sub>) δ (ppm): 8.25 – 8.14 (m, 2H), 7.56 – 7.43 (m, 3H), 6.11 – 6.03 (m, 1H), 4.10 – 3.76 (m, 2H), 2.59 – 1.66 (m, 6H). <sup>13</sup>C NMR (100 MHz, CDCl<sub>3</sub>) δ (ppm): 165.0, 130.3, 128.8, 127.2, 127.0, 87.8, 66.8, 29.0, 24.5, 20.8. HRMS *m/z* (ESI) calcd for C<sub>12</sub>H<sub>15</sub>N<sub>4</sub>O ([M+H]<sup>+</sup>) 231.1240, found 231.1245.

### 2-cinnamyl-5-phenyl-2*H*-tetrazole (3k)

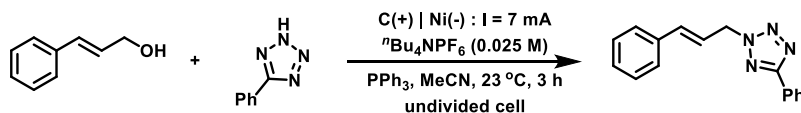

The starting (*E*)-3-phenylprop-2-en-1-ol (54 mg, 0.4 mmol) was reacted with 5-phenyl-2*H*-tetrazole (44 mg, 0.30 mmol) and PPh<sub>3</sub> (105 mg, 0.4 mmol) according to General Procedure. Water (10 mL) was added to the reaction mixture and extracted with ethyl acetate (10 mL × 3). The crude product was purified by column

chromatography (petroleum ether/ethyl acetate = 50:1) to afford the title compound as a colorless oil in 31% yield (24 mg).

Rf (petroleum ether/ethyl acetate = 10:1): 0.4; **<sup>1</sup>H NMR** (400 MHz, CDCl<sub>3</sub>) δ (ppm): 8.20 – 8.12 (m, 2H), 7.50 – 7.32 (m, 8H), 6.62 – 6.52 (m, 2H), 5.52 – 5.29 (m, 2H). **<sup>13</sup>C NMR** (100 MHz, CDCl<sub>3</sub>) δ (ppm): 165.1, 136.5, 133.9, 130.2, 128.9, 128.8, 127.5, 126.9, 120.1, 70.0, 29.6, 14.1. **HRMS m/z (ESI)** calcd for C<sub>16</sub>H<sub>15</sub>N<sub>4</sub> ([M+H]<sup>+</sup>) 263.1291, found 263.1293.

### 1-(4-methoxybenzyl)-4-nitro-1H-pyrazole (3l)

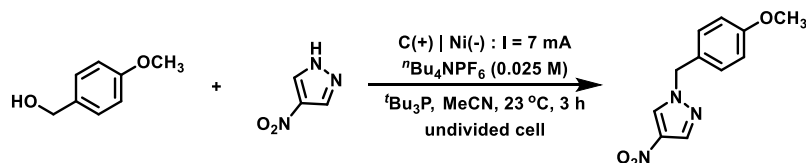

The starting (4-methoxyphenyl)methanol (55 mg, 0.4 mmol) was reacted with 4-nitro-1H-pyrazole (34 mg, 0.30 mmol) and <sup>t</sup>Bu<sub>3</sub>P (89 mg, 0.4 mmol) according to General Procedure. Water (10 mL) was added to the reaction mixture and extracted with ethyl acetate (10 mL × 3). The crude product was purified by column chromatography (petroleum ether/ethyl acetate = 100:1) to afford the title compound as a colorless oil in 22% yield (15.3 mg).

Rf (petroleum ether/ethyl acetate = 10:1): 0.3; **<sup>1</sup>H NMR** (400 MHz, CDCl<sub>3</sub>) δ (ppm): 8.06 (s, 1H), 7.98 (s, 1H), 7.24 (d, *J* = 8.3 Hz, 2H), 6.91 (d, *J* = 8.6 Hz, 2H), 5.22 (s, 2H), 3.81 (s, 3H). **<sup>13</sup>C NMR** (100 MHz, CDCl<sub>3</sub>) δ (ppm): 160.1, 135.8, 130.0, 128.0, 125.6, 114.6, 56.8, 55.3. **HRMS m/z (ESI)** calcd for C<sub>11</sub>H<sub>12</sub>N<sub>3</sub>O<sub>3</sub> ([M+H]<sup>+</sup>) 234.0873, found 234.0880.

### 1-benzhydryl-4-nitro-1H-pyrazole (3m)

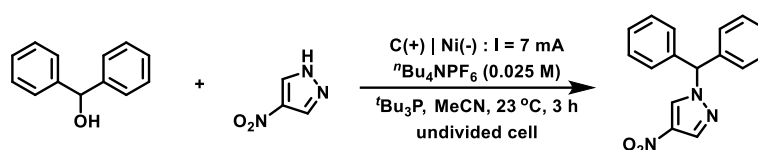

The starting diphenylmethanol (74 mg, 0.4 mmol) was reacted with 4-nitro-1H-pyrazole (34 mg, 0.30 mmol) and <sup>t</sup>Bu<sub>3</sub>P (89 mg, 0.4 mmol) according to General Procedure. Water (10 mL) was added to the reaction mixture and extracted with ethyl acetate (10 mL × 3). The crude product was purified by column chromatography (petroleum ether/ethyl acetate = 50:1) to afford the title compound as a colorless oil in 24% yield (20 mg).

Rf (petroleum ether/ethyl acetate = 10:1): 0.2; **<sup>1</sup>H NMR** (400 MHz, CDCl<sub>3</sub>) δ (ppm): 8.16 (s, 1H), 7.94 (s, 1H), 7.43 – 7.34 (m, 6H), 7.14 – 7.04 (m, 4H), 6.75 (s, 1H). **<sup>13</sup>C NMR** (100 MHz, CDCl<sub>3</sub>) δ (ppm): 142.1,

137.5, 132.4, 130.0, 128.2, 127.2, 79.9. **HRMS m/z (ESI)** calcd for C<sub>16</sub>H<sub>14</sub>N<sub>3</sub>O<sub>2</sub> ([M+H]<sup>+</sup>) 280.1081, found 280.1088.

#### 4-nitro-1-(2-phenylpropan-2-yl)-1H-pyrazole (3n)

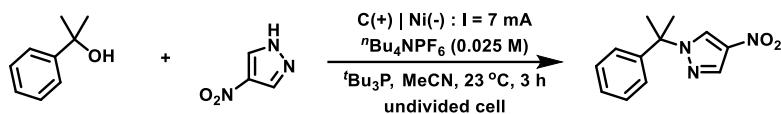

The starting 2-phenylpropan-2-ol (54 mg, 0.4 mmol) was reacted with 4-nitro-1H-pyrazole (34 mg, 0.30 mmol) and <sup>t</sup>Bu<sub>3</sub>P (89 mg, 0.4 mmol) according to General Procedure. Water (10 mL) was added to the reaction mixture and extracted with ethyl acetate (10 mL × 3). The crude product was purified by column chromatography (petroleum ether/ethyl acetate = 50:1) to afford the title compound as a colorless oil in 30% yield (21 mg).

R<sub>f</sub> (petroleum ether/ethyl acetate = 10:1): 0.4; **<sup>1</sup>H NMR** (400 MHz, CDCl<sub>3</sub>) (rotameric mixture) δ (ppm): 8.15 – 8.10 (m, 2H), 7.40 – 7.32 (m, 3H), 7.19 – 7.13 (m, 2H), 2.00 (s, 6H). **<sup>13</sup>C NMR** (100 MHz, CDCl<sub>3</sub>) (rotameric mixture) δ (ppm): 143.7, 135.3, 128.8, 128.1, 127.2, 125.1, 65.6, 29.2. **HRMS m/z (ESI)** calcd for C<sub>12</sub>H<sub>14</sub>N<sub>3</sub>O<sub>2</sub> ([M+H]<sup>+</sup>) 232.1081, found 232.1084.

#### *Tert*-butyl 2-(4-bromo-1H-pyrazol-1-yl)pyrrolidine-1-carboxylate (3o)

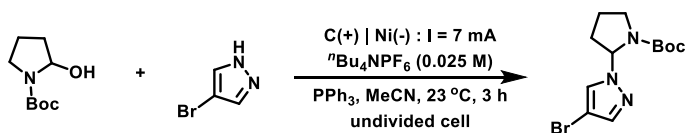

The starting *tert*-butyl 2-hydroxypyrrolidine-1-carboxylate (75 mg, 0.4 mmol) was reacted with 4-bromo-1H-pyrazole (44 mg, 0.30 mmol) and PPh<sub>3</sub> (105 mg, 0.4 mmol) according to General Procedure. Water (10 mL) was added to the reaction mixture and extracted with ethyl acetate (10 mL × 3). The crude product was purified by column chromatography (petroleum ether/ethyl acetate = 10:1) to afford the title compound as a colorless oil in 83% yield (79 mg).

R<sub>f</sub> (petroleum ether/ethyl acetate = 3:1): 0.2; **<sup>1</sup>H NMR** (400 MHz, CDCl<sub>3</sub>) (rotameric mixture) δ (ppm): 7.76 – 7.38 (m, 2H), 6.05 – 5.82 (m, 1H), 3.76 – 3.29 (m, 2H), 2.51 – 1.88 (m, 4H), 1.58 – 1.26 (m, 9H). **<sup>13</sup>C NMR** (100 MHz, CDCl<sub>3</sub>) (rotameric mixture) δ (ppm): 154.2, 153.3, 139.9, 129.3, 128.0, 92.5, 92.3, 80.8, 80.5, 73.7, 73.2, 46.8, 46.4, 33.4, 31.8, 28.2, 28.1, 23.3, 22.1. **HRMS m/z (ESI)** calcd for C<sub>12</sub>H<sub>19</sub>BrN<sub>3</sub>O<sub>2</sub> ([M+H]<sup>+</sup>) 316.0655, found 316.0659.

### *Tert*-butyl 2-(5-phenyl-1*H*-pyrazol-1-yl)pyrrolidine-1-carboxylate (3p)

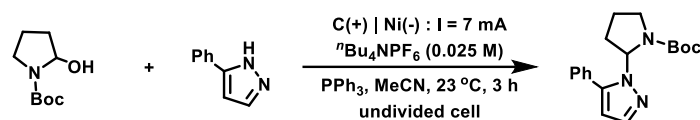

The starting *tert*-butyl 2-hydroxypyrrolidine-1-carboxylate (75 mg, 0.4 mmol) was reacted with 5-phenyl-1*H*-pyrazole (44 mg, 0.30 mmol) and PPh<sub>3</sub> (105 mg, 0.4 mmol) according to General Procedure. Water (10 mL) was added to the reaction mixture and extracted with ethyl acetate (10 mL × 3). The crude product was purified by column chromatography (petroleum ether/ethyl acetate = 50:1) to afford the title compound as a colorless oil in 70% yield (66 mg).

R<sub>f</sub> (petroleum ether/ethyl acetate = 10:1): 0.3; <sup>1</sup>H NMR (400 MHz, CDCl<sub>3</sub>) (rotameric mixture) δ (ppm): 7.89 – 7.77 (m, 2H), 7.68 – 7.43 (m, 1H), 7.43 – 7.34 (m, 2H), 7.33 – 7.26 (m, 1H), 6.51 (s, 1H), 6.11 – 5.93 (m, 1H), 3.81 – 3.39 (m, 2H), 2.63 – 1.94 (m, 4H), 1.55 – 1.32 (m, 9H). <sup>13</sup>C NMR (100 MHz, CDCl<sub>3</sub>) (rotameric mixture) δ (ppm): 174.3, 150.2, 131.8, 128.7, 128.0, 125.7, 82.7, 46.4, 32.9, 28.0, 17.3. HRMS *m/z* (ESI) calcd for C<sub>18</sub>H<sub>24</sub>N<sub>3</sub>O<sub>2</sub> ([M+H]<sup>+</sup>) 314.1863, found 314.1868.

### *Tert*-butyl 2-(3,5-diphenyl-1*H*-pyrazol-1-yl)pyrrolidine-1-carboxylate (3q)

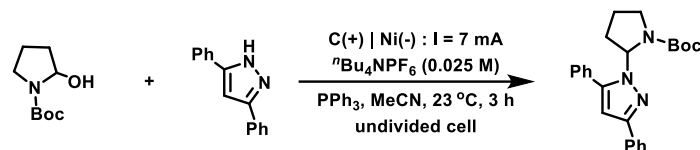

The starting *tert*-butyl 2-hydroxypyrrolidine-1-carboxylate (75 mg, 0.4 mmol) was reacted with 3,5-diphenyl-1*H*-pyrazole (66 mg, 0.30 mmol) and PPh<sub>3</sub> (105 mg, 0.4 mmol) according to General Procedure. Water (10 mL) was added to the reaction mixture and extracted with ethyl acetate (10 mL × 3). The crude product was purified by column chromatography (petroleum ether/ethyl acetate = 50:1) to afford the title compound as a white solid in 75% yield (88 mg).

R<sub>f</sub> (petroleum ether/ethyl acetate = 10:1): 0.3; <sup>1</sup>H NMR (400 MHz, CDCl<sub>3</sub>) (rotameric mixture) δ (ppm): 7.91 – 7.82 (m, 2H), 7.75 – 7.25 (m, 8H), 6.65 – 6.49 (m, 1H), 6.24 – 6.03 (m, 1H), 3.99 – 3.41 (m, 2H), 2.66 – 1.84 (m, 4H), 1.49 – 1.15 (m, 9H). <sup>13</sup>C NMR (100 MHz, CDCl<sub>3</sub>) (rotameric mixture) δ (ppm): 153.9, 153.5, 150.3, 150.1, 144.6, 144.0, 133.8, 133.6, 130.8, 130.5, 129.3, 128.8, 128.6, 128.4, 128.3, 127.9, 127.4, 127.3, 125.5, 125.4, 103.2, 102.7, 80.0, 79.6, 70.4, 47.2, 47.0, 34.9, 33.6, 28.3, 28.1, 22.9, 22.0. HRMS *m/z* (ESI) calcd for C<sub>24</sub>H<sub>28</sub>N<sub>3</sub>O<sub>2</sub> ([M+H]<sup>+</sup>) 390.2176, found 392.2180.

### Ethyl 1-(1-(*tert*-butoxycarbonyl)pyrrolidin-2-yl)-5-(trifluoromethyl)-1*H*-pyrazole-4-carboxylate (3r)

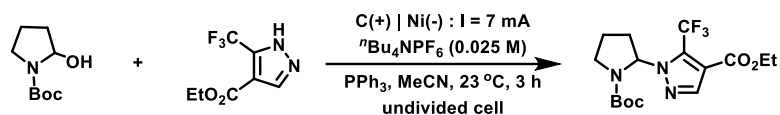

The starting *tert*-butyl 2-hydroxypyrrolidine-1-carboxylate (75 mg, 0.4 mmol) was reacted with ethyl 5-(trifluoromethyl)-1*H*-pyrazole-4-carboxylate (63 mg, 0.30 mmol) and PPh<sub>3</sub> (105 mg, 0.4 mmol) according to General Procedure. Water (10 mL) was added to the reaction mixture and extracted with ethyl acetate (10 mL × 3). The crude product was purified by column chromatography (petroleum ether/ethyl acetate = 10:1) to afford the title compound as a white solid in 95% yield (108 mg).

Rf (petroleum ether/ethyl acetate = 3:1): 0.3; <sup>1</sup>H NMR (400 MHz, CDCl<sub>3</sub>) (rotameric mixture) δ (ppm): 8.20 – 8.01 (m, 1H), 6.11 – 5.90 (m, 1H), 4.37 – 4.25 (m, 2H), 3.77 – 3.38 (m, 2H), 2.51 – 1.94 (m, 4H), 1.53 – 1.28 (m, 12H). <sup>13</sup>C NMR (100 MHz, CDCl<sub>3</sub>) (rotameric mixture) δ (ppm): 160.9 , 160.8 , 154.2 , 153.0 , 141.6 (q, *J* = 38.4 Hz), 135.1 , 133.9 , 120.3 (q, *J* = 269.2 Hz), 112.3 , 81.4 , 81.0 , 74.6 , 74.2 , 60.7 , 46.9 , 46.5 , 33.4 , 32.0 , 28.3 , 28.1 23.1 , 21.9 , 14.0. HRMS *m/z* (ESI) calcd for C<sub>16</sub>H<sub>23</sub>F<sub>3</sub>N<sub>3</sub>O<sub>4</sub> ([M+H]<sup>+</sup>) 378.1635, found 378.1637.

#### *Tert*-butyl 2-(3-chloro-1*H*-indazol-1-yl)pyrrolidine-1-carboxylate (3s)

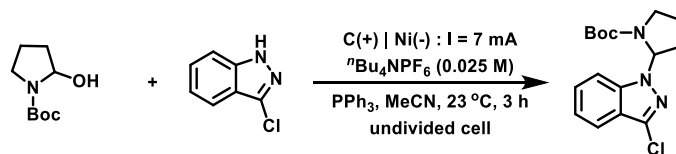

The starting *tert*-butyl 2-hydroxypyrrolidine-1-carboxylate (75 mg, 0.4 mmol) was reacted with 3-chloro-1*H*-indazole (46 mg, 0.30 mmol) and PPh<sub>3</sub> (105 mg, 0.4 mmol) according to General Procedure. Water (10 mL) was added to the reaction mixture and extracted with ethyl acetate (10 mL × 3). The crude product was purified by column chromatography (petroleum ether/ethyl acetate = 10:1) to afford the title compound as a colorless oil in 70% yield (83 mg).

Rf (petroleum ether/ethyl acetate = 3:1): 0.4; <sup>1</sup>H NMR (400 MHz, CDCl<sub>3</sub>) (rotameric mixture) δ (ppm): 7.80 – 7.37 (m, 3H), 7.24 – 7.15 (m, 1H), 6.48 – 6.19 (m, 1H), 3.95 – 3.42 (m, 2H), 2.74 – 1.92 (m, 4H), 1.48 – 1.07 (m, 9H). <sup>13</sup>C NMR (100 MHz, CDCl<sub>3</sub>) (rotameric mixture) δ (ppm): 154.3, 153.5, 140.9, 140.2, 133.5, 127.4, 127.2, 121.2, 120.7, 119.6, 119.2, 110.5, 109.8, 80.4, 80.1, 70.6, 70.0, 46.8, 46.6, 34.0, 32.6, 28.3, 28.1, 23.7, 22.6. HRMS *m/z* (ESI) calcd for C<sub>16</sub>H<sub>21</sub>ClN<sub>3</sub>O<sub>2</sub> ([M+H]<sup>+</sup>) 322.1317, found 322.1323.

#### *Tert*-butyl 2-(4,5-dibromo-2*H*-1,2,3-triazol-2-yl)pyrrolidine-1-carboxylate (3t)

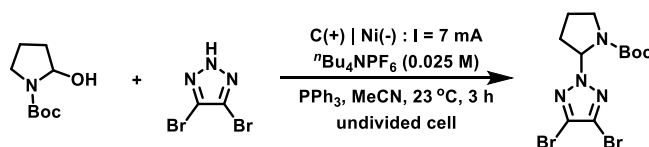

The starting *tert*-butyl 2-hydroxypyrrolidine-1-carboxylate (75 mg, 0.4 mmol) was reacted with 4,5-dibromo-2*H*-1,2,3-triazole (68 mg, 0.30 mmol) and PPh<sub>3</sub> (105 mg, 0.4 mmol) according to General Procedure. Water (10 mL) was added to the reaction mixture and extracted with ethyl acetate (10 mL × 3). The crude product was purified by column chromatography (petroleum ether/ethyl acetate = 10:1) to afford the title compound as a colorless oil in 92% yield (109 mg).

Rf (petroleum ether/ethyl acetate = 3:1): 0.2; <sup>1</sup>H NMR (400 MHz, CDCl<sub>3</sub>) (rotameric mixture) δ (ppm): 6.37 – 6.07 (m, 1H), 3.87 – 3.35 (m, 2H), 2.43 – 1.89 (m, 4H), 1.53 – 1.21 (m, 9H). <sup>13</sup>C NMR (100 MHz, CDCl<sub>3</sub>) (rotameric mixture, resonances for minor rotamer are marked with m, and resonances for major rotamer are marked with M.) δ (ppm): 153.8<sup>m</sup>, 153.1<sup>M</sup>, 124.4<sup>m</sup>, 124.0<sup>M</sup>, 81.1<sup>M</sup>, 81.0<sup>m</sup>, 77.7<sup>m</sup>, 77.6<sup>M</sup>, 46.8<sup>m</sup>, 46.3<sup>M</sup>, 33.4<sup>M</sup>, 32.8<sup>m</sup>, 28.1<sup>m</sup>, 28.0<sup>M</sup>, 22.5<sup>m</sup>, 21.7<sup>M</sup>. HRMS m/z (ESI) calcd for C<sub>11</sub>H<sub>17</sub>Br<sub>2</sub>N<sub>4</sub>O<sub>2</sub> ([M+H]<sup>+</sup>) 396.9692, found 396.9696.

#### *Tert*-butyl 2-(4-nitro-2*H*-1,2,3-triazol-2-yl)pyrrolidine-1-carboxylate (3u)

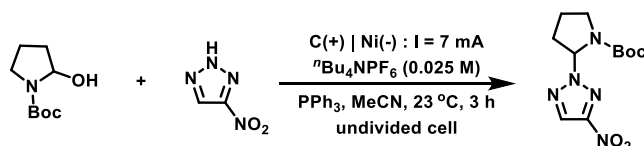

The starting *tert*-butyl 2-hydroxypyrrolidine-1-carboxylate (75 mg, 0.4 mmol) was reacted with 4-nitro-2*H*-1,2,3-triazole (34 mg, 0.30 mmol) and PPh<sub>3</sub> (105 mg, 0.4 mmol) according to General Procedure. Water (10 mL) was added to the reaction mixture and extracted with ethyl acetate (10 mL × 3). The crude product was purified by column chromatography (petroleum ether/ethyl acetate = 10:1) to afford the title compound as a colorless oil in 83% yield (70 mg).

Rf (petroleum ether/ethyl acetate = 5:1): 0.4; <sup>1</sup>H NMR (400 MHz, CDCl<sub>3</sub>) (rotameric mixture) δ (ppm): 8.17 (s, 1H), 6.50 – 6.25 (m, 1H), 3.93 – 3.45 (m, 2H), 2.56 – 1.99 (m, 4H), 1.50 – 1.25 (m, 9H). <sup>13</sup>C NMR (100 MHz, CDCl<sub>3</sub>) (rotameric mixture) δ (ppm): 153.6, 153.1, 153.0, 152.6, 130.3, 130.2, 81.1, 78.4, 46.9, 46.4, 33.6, 32.8, 28.1, 28.0, 22.5, 21.7. HRMS m/z (ESI) calcd for C<sub>11</sub>H<sub>18</sub>N<sub>5</sub>O<sub>4</sub> ([M+H]<sup>+</sup>) 284.1353, found 284.1359.

#### *Tert*-butyl 2-(1*H*-benzo[*d*][1,2,3]triazol-1-yl)pyrrolidine-1-carboxylate (3v)

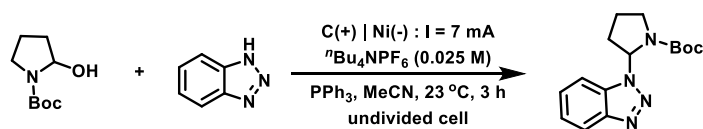

The starting *tert*-butyl 2-hydroxypyrrolidine-1-carboxylate (75 mg, 0.4 mmol) was reacted with 1*H*-benzo[*d*][1,2,3]triazole (36 mg, 0.30 mmol) and PPh<sub>3</sub> (105 mg, 0.4 mmol) according to General Procedure. Water (10 mL) was added to the reaction mixture and extracted with ethyl acetate (10 mL × 3). The crude product was purified by column chromatography (petroleum ether/ethyl acetate = 10:1) to afford the title compound as a white solid in 85% yield (74 mg).

R<sub>f</sub> (petroleum ether/ethyl acetate = 3:1): 0.3; <sup>1</sup>H NMR (400 MHz, CDCl<sub>3</sub>) (rotameric mixture) δ (ppm): 8.15 – 7.96 (m, 1H), 7.88 – 7.43 (m, 2H), 7.43 – 7.30 (m, 1H), 6.73 – 6.52 (m, 1H), 4.07 – 3.49 (m, 2H), 2.80 – 2.04 (m, 4H), 1.56 – 1.04 (m, 9H). <sup>13</sup>C NMR (100 MHz, CDCl<sub>3</sub>) (rotameric mixture, resonances for minor rotamer are marked with m, and resonances for major rotamer are marked with M.) δ (ppm): 154.0<sup>m</sup>, 153.0<sup>M</sup>, 145.5<sup>(m+M)</sup>, 132.7<sup>m</sup>, 131.7<sup>M</sup>, 127.1<sup>(m+M)</sup>, 123.6<sup>(m+M)</sup>, 119.8<sup>M</sup>, 119.4<sup>m</sup>, 110.3<sup>m</sup>, 109.6<sup>M</sup>, 80.7<sup>M</sup>, 80.4<sup>m</sup>, 71.2<sup>M</sup>, 70.2<sup>m</sup>, 46.7<sup>m</sup>, 46.6<sup>M</sup>, 34.3<sup>M</sup>, 32.8<sup>m</sup>, 28.1<sup>m</sup>, 27.8<sup>M</sup>, 23.5<sup>m</sup>, 22.5<sup>M</sup>. HRMS *m/z* (ESI) calcd for C<sub>15</sub>H<sub>21</sub>N<sub>4</sub>O<sub>2</sub> ([M+H]<sup>+</sup>) 289.1659, found 289.1667.

#### *Tert*-butyl 2-(5-phenyl-2*H*-tetrazol-2-yl)pyrrolidine-1-carboxylate (3w)

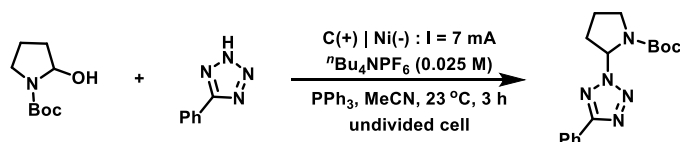

The starting *tert*-butyl 2-hydroxypyrrolidine-1-carboxylate (75 mg, 0.4 mmol) was reacted with 5-phenyl-2*H*-tetrazole (44 mg, 0.30 mmol) and PPh<sub>3</sub> (105 mg, 0.4 mmol) according to General Procedure. Water (10 mL) was added to the reaction mixture and extracted with ethyl acetate (10 mL × 3). The crude product was purified by column chromatography (petroleum ether/ethyl acetate = 10:1) to afford the title compound as a white solid in 73% yield (69 mg).

R<sub>f</sub> (petroleum ether/ethyl acetate = 3:1): 0.5; <sup>1</sup>H NMR (400 MHz, CDCl<sub>3</sub>) (rotameric mixture) δ (ppm): 8.18 – 8.09 (m, 2H), 7.55 – 7.38 (m, 3H), 6.70 – 6.49 (m, 1H), 3.95 – 3.41 (m, 2H), 2.54 – 1.99 (m, 4H), 1.49 – 1.24 (m, 9H). <sup>13</sup>C NMR (100 MHz, CDCl<sub>3</sub>) (rotameric mixture, resonances for minor rotamer are marked with m, and resonances for major rotamer are marked with M.) δ (ppm): 164.7<sup>(m+M)</sup>, 153.5<sup>m</sup>, 152.8<sup>M</sup>, 130.1<sup>M</sup>, 130.0<sup>m</sup>, 128.7<sup>(m+M)</sup>, 127.5<sup>m</sup>, 127.3<sup>M</sup>, 126.7<sup>(m+M)</sup>, 81.1<sup>M</sup>, 80.9<sup>m</sup>, 75.6<sup>m</sup>, 75.3<sup>M</sup>, 46.7<sup>m</sup>, 46.3<sup>M</sup>, 33.5<sup>M</sup>, 32.8<sup>m</sup>, 28.1<sup>m</sup>, 28.0<sup>M</sup>, 22.6<sup>m</sup>, 21.9<sup>M</sup>. HRMS *m/z* (ESI) calcd for C<sub>16</sub>H<sub>22</sub>N<sub>5</sub>O<sub>2</sub> ([M+H]<sup>+</sup>) 316.1768, found 316.1772.

#### *Tert*-butyl 2-(1-oxoisindolin-2-yl)pyrrolidine-1-carboxylate (3x)

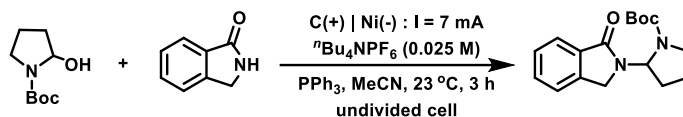

The starting *tert*-butyl 2-hydroxypyrrolidine-1-carboxylate (75 mg, 0.4 mmol) was reacted with isoindolin-1-one (40 mg, 0.30 mmol) and PPh<sub>3</sub> (105 mg, 0.4 mmol) according to General Procedure. Water (10 mL) was added to the reaction mixture and extracted with ethyl acetate (10 mL × 3). The crude product was purified by column chromatography (petroleum ether/ethyl acetate = 10:1) to afford the title compound as a colorless oil in 58% yield (53 mg).

R<sub>f</sub> (petroleum ether/ethyl acetate = 3:1): 0.3; <sup>1</sup>H NMR (400 MHz, CDCl<sub>3</sub>) δ (ppm): 7.89 – 7.81 (m, 1H), 7.61 – 7.51 (m, 1H), 7.50 – 7.41 (m, 2H), 6.13 (s, 1H), 4.31 (s, 2H), 3.67 – 3.45 (m, 2H), 2.37 – 1.93 (m, 4H), 1.56 – 1.15 (m, 9H). <sup>13</sup>C NMR (100 MHz, CDCl<sub>3</sub>) δ (ppm): 167.9, 154.1, 140.1, 132.4, 131.4, 128.0, 123.6, 122.7, 80.2, 65.0, 46.5, 45.5, 32.4, 28.1, 23.0. HRMS *m/z* (ESI) calcd for C<sub>17</sub>H<sub>23</sub>N<sub>2</sub>O<sub>3</sub> ([M+H]<sup>+</sup>) 303.1703, found 303.1708.

#### *Tert*-butyl 2,5-dioxo-[1,2'-bipyrrolidine]-1'-carboxylate (3y)

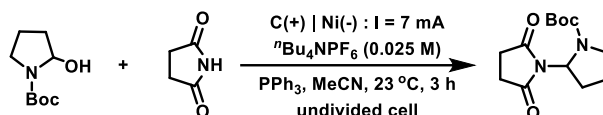

The starting *tert*-butyl 2-hydroxypyrrolidine-1-carboxylate (75 mg, 0.4 mmol) was reacted with pyrrolidine-2,5-dione (30 mg, 0.30 mmol) and PPh<sub>3</sub> (105 mg, 0.4 mmol) according to General Procedure. Water (10 mL) was added to the reaction mixture and extracted with ethyl acetate (10 mL × 3). The crude product was purified by column chromatography (petroleum ether/ethyl acetate = 10:1) to afford the title compound as a colorless oil in 65% yield (52 mg).

R<sub>f</sub> (petroleum ether/ethyl acetate = 3:1): 0.2; <sup>1</sup>H NMR (400 MHz, CDCl<sub>3</sub>) (rotameric mixture) δ (ppm): 5.87 – 5.72 (m, 1H), 3.64 – 3.38 (m, 2H), 2.68 – 2.55 (m, 4H), 2.32 – 1.76 (m, 4H), 1.41 – 1.31 (m, 9H). <sup>13</sup>C NMR (100 MHz, CDCl<sub>3</sub>) (rotameric mixture) δ (ppm): 176.5, 175.9, 153.4, 152.9, 80.0, 79.8, 64.6, 64.2, 47.2, 46.9, 31.2, 30.5, 28.4, 28.2, 27.9, 23.9, 23.5. HRMS *m/z* (ESI) calcd for C<sub>13</sub>H<sub>21</sub>N<sub>2</sub>O<sub>4</sub> ([M+H]<sup>+</sup>) 269.1496, found 269.1500.

#### *Tert*-butyl 2-(1,3-dioxoisindolin-2-yl)pyrrolidine-1-carboxylate (3z)

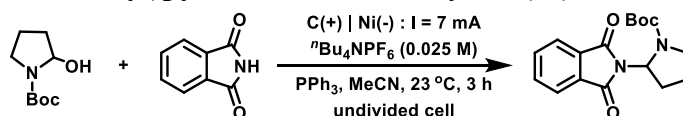

The starting *tert*-butyl 2-hydroxypyrrolidine-1-carboxylate (75 mg, 0.4 mmol) was reacted with isoindoline-1,3-dione (44 mg, 0.30 mmol) and PPh<sub>3</sub> (105 mg, 0.4 mmol) according to General Procedure.

Water (10 mL) was added to the reaction mixture and extracted with ethyl acetate (10 mL  $\times$  3). The crude product was purified by column chromatography (petroleum ether/ethyl acetate = 5:1) to afford the title compound as a white solid in 65% yield (62 mg).

Rf (petroleum ether/ethyl acetate = 1:1): 0.4; **<sup>1</sup>H NMR** (400 MHz, CDCl<sub>3</sub>) (rotameric mixture)  $\delta$  (ppm): 7.91 – 7.78 (m, 2H), 7.78 – 7.66 (m, 2H), 6.12 – 5.90 (m, 1H), 3.79 – 3.44 (m, 2H), 2.46 – 1.85 (m, 4H), 1.40 – 1.21 (m, 9H). **<sup>13</sup>C NMR** (100 MHz, CDCl<sub>3</sub>) (rotameric mixture)  $\delta$  (ppm): 167.6, 167.3, 153.6, 153.2, 134.1, 133.8, 131.9, 131.8, 123.2, 123.1, 80.1, 79.8, 63.9, 63.6, 47.2, 46.8, 32.0, 31.3, 28.2, 23.9, 23.4. **HRMS m/z (ESI)** calcd for C<sub>17</sub>H<sub>21</sub>N<sub>2</sub>O<sub>4</sub> ([M+H]<sup>+</sup>) 317.1496, found 317.1505.

### ***Tert*-butyl 2-(phenylsulfonamido)pyrrolidine-1-carboxylate (3aa)**

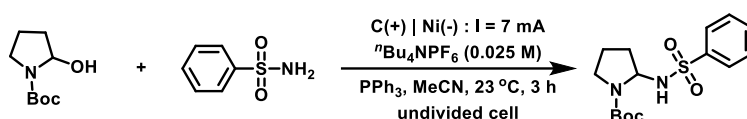

The starting *tert*-butyl 2-hydroxypyrrolidine-1-carboxylate (75 mg, 0.4 mmol) was reacted with benzenesulfonamide (47 mg, 0.30 mmol) and PPh<sub>3</sub> (105 mg, 0.4 mmol) according to General Procedure. Water (10 mL) was added to the reaction mixture and extracted with ethyl acetate (10 mL  $\times$  3). The crude product was purified by column chromatography (petroleum ether/ethyl acetate = 3:1) to afford the title compound as a white solid in 36% yield (35 mg).

Rf (petroleum ether/ethyl acetate = 1:1): 0.3; **<sup>1</sup>H NMR** (400 MHz, CDCl<sub>3</sub>) (rotameric mixture)  $\delta$  (ppm): 7.99 – 7.83 (m, 2H), 7.64 – 7.45 (m, 3H), 5.62 – 4.89 (m, 2H), 3.43 – 3.12 (m, 2H), 2.39 – 1.78 (m, 4H), 1.42 – 1.25 (m, 9H). **<sup>13</sup>C NMR** (100 MHz, CDCl<sub>3</sub>) (rotameric mixture)  $\delta$  (ppm): 153.9, 153.3, 141.0, 140.5, 132.4, 128.9, 126.9, 126.6, 80.6, 80.1, 68.0, 45.9, 45.5, 32.9, 31.5, 28.1, 22.5, 21.4. **HRMS m/z (ESI)** calcd for C<sub>15</sub>H<sub>23</sub>N<sub>2</sub>O<sub>4</sub>S ([M+H]<sup>+</sup>) 327.1373, found 327.1380.

### ***Tert*-butyl 2-((*N*,4-dimethylphenyl)sulfonamido)pyrrolidine-1-carboxylate (3ab)**

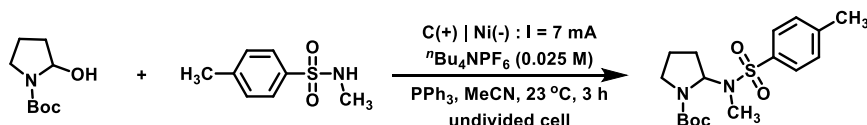

The starting *tert*-butyl 2-hydroxypyrrolidine-1-carboxylate (75 mg, 0.4 mmol) was reacted with *N*,4-dimethylbenzenesulfonamide (56 mg, 0.30 mmol) and PPh<sub>3</sub> (105 mg, 0.4 mmol) according to General Procedure. Water (10 mL) was added to the reaction mixture and extracted with ethyl acetate (10 mL  $\times$  3).

The crude product was purified by column chromatography (petroleum ether/ethyl acetate = 3:1) to afford the title compound as a white solid in 85% yield (90 mg).

Rf (petroleum ether/ethyl acetate = 1:1): 0.3; **<sup>1</sup>H NMR** (400 MHz, CDCl<sub>3</sub>) (rotameric mixture) δ (ppm): 7.83 – 7.60 (m, 2H), 7.38 – 7.23 (m, 2H), 5.86 – 5.17 (m, 1H), 3.56 – 3.18 (m, 2H), 2.67 – 2.54 (m, 3H), 2.47 – 2.37 (m, 3H), 2.14 – 1.75 (m, 4H), 1.53 – 1.41 (m, 9H). **<sup>13</sup>C NMR** (100 MHz, CDCl<sub>3</sub>) (rotameric mixture) δ (ppm): 154.0, 153.9, 143.1, 142.8, 136.5, 135.7, 129.4, 127.0, 81.4, 79.8, 70.9, 45.7, 33.3, 32.6, 29.0, 28.3, 28.2, 28.1, 27.8, 22.5, 21.3. **HRMS m/z (ESI)** calcd for C<sub>17</sub>H<sub>27</sub>N<sub>2</sub>O<sub>4</sub>S ([M+H]<sup>+</sup>) 355.1686, found 355.1693.

### ***Tert*-butyl 2-(2-(phenylsulfonyl)hydrazinyl)pyrrolidine-1-carboxylate (3ac)**

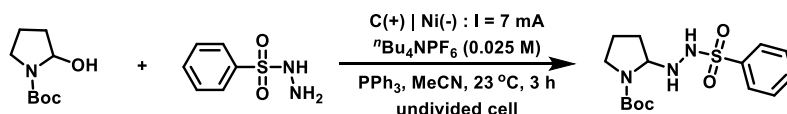

The starting *tert*-butyl 2-hydroxypyrrolidine-1-carboxylate (75 mg, 0.4 mmol) was reacted with benzenesulfonylhydrazide (52 mg, 0.30 mmol) and PPh<sub>3</sub> (105 mg, 0.4 mmol) according to General Procedure. Water (10 mL) was added to the reaction mixture and extracted with ethyl acetate (10 mL × 3). The crude product was purified by column chromatography (petroleum ether/ethyl acetate = 5:1) to afford the title compound as a white solid in 35% yield (36 mg).

Rf (petroleum ether/ethyl acetate = 1:1): 0.4; **<sup>1</sup>H NMR** (400 MHz, CDCl<sub>3</sub>) δ (ppm): 7.98 – 7.89 (m, 2H), 7.63 – 7.49 (m, 3H), 4.50 – 4.36 (m, 1H), 3.37 – 3.11 (m, 2H), 1.93 – 1.62 (m, 4H), 1.50 – 1.42 (m, 9H). **<sup>13</sup>C NMR** (100 MHz, CDCl<sub>3</sub>) δ (ppm): 156.0, 138.2, 132.8, 128.7, 128.1, 80.3, 73.5, 46.7, 29.8, 28.3, 23.1. **HRMS m/z (ESI)** calcd for C<sub>15</sub>H<sub>24</sub>N<sub>3</sub>O<sub>4</sub>S ([M+H]<sup>+</sup>) 342.1482, found 342.1490.

### ***Tert*-butyl 2-((*tert*-butoxycarbonyl)amino)pyrrolidine-1-carboxylate (3ad)**

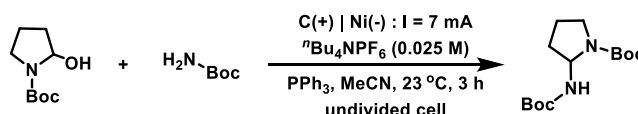

The starting *tert*-butyl 2-hydroxypyrrolidine-1-carboxylate (75 mg, 0.4 mmol) was reacted with *tert*-butyl carbamate (35 mg, 0.30 mmol) and PPh<sub>3</sub> (105 mg, 0.4 mmol) according to General Procedure. Water (10 mL) was added to the reaction mixture and extracted with ethyl acetate (10 mL × 3). The crude product was purified by column chromatography (petroleum ether/ethyl acetate = 10:1) to afford the title compound as a colorless oil in 49% yield (42 mg).

Rf (petroleum ether/ethyl acetate = 3:1): 0.3; **<sup>1</sup>H NMR** (400 MHz, CDCl<sub>3</sub>) δ (ppm): 5.40 (br s, 1H), 4.78 (br s, 1H), 3.55 – 3.14 (m, 2H), 2.14 – 1.76 (m, 4H), 1.46 (s, 9H), 1.44 (s, 9H). **<sup>13</sup>C NMR** (100 MHz, CDCl<sub>3</sub>) δ

(ppm): 154.2, 154.1, 79.9, 79.3, 65.6, 45.8, 34.2, 28.4, 28.4, 22.5. **HRMS m/z (ESI)** calcd for C<sub>14</sub>H<sub>27</sub>N<sub>2</sub>O<sub>4</sub> ([M+H]<sup>+</sup>) 287.1965, found 287.1972.

**1-((3a*S*,4*S*,6*R*,6a*S*)-6-((*R*)-2,2-dimethyl-1,3-dioxolan-4-yl)-2,2-dimethyltetrahydrofuro[3,4-*d*][1,3]dioxol-4-yl)-2*H*-benzo[*d*][1,2,3]triazole (3ae)**

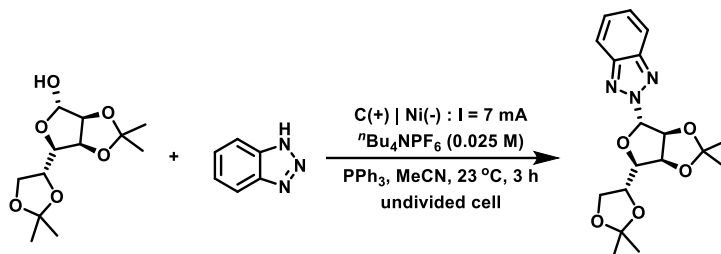

The starting (3a*S*,4*S*,6*R*,6a*S*)-6-((*R*)-2,2-dimethyl-1,3-dioxolan-4-yl)-2,2-dimethyltetrahydrofuro[3,4-*d*][1,3]dioxol-4-ol (104 mg, 0.4 mmol) was reacted with 1*H*-benzo[*d*][1,2,3]triazole (36 mg, 0.30 mmol) and PPh<sub>3</sub> (105 mg, 0.4 mmol) according to General Procedure. Water (10 mL) was added to the reaction mixture and extracted with ethyl acetate (10 mL × 3). The crude product was purified by column chromatography (petroleum ether/ethyl acetate = 5:1) to afford the title compound as a white solid in 75% yield (81 mg). (α:β = 5:1)

R<sub>f</sub> (petroleum ether/ethyl acetate = 3:1): 0.3; **<sup>1</sup>H NMR** (400 MHz, CDCl<sub>3</sub>) δ (ppm): 8.03 – 7.81 (m, 2H), 7.48 – 7.39 (m, 2H), 5.46 (s, 1H), 4.87 – 4.82 (m, 1H), 4.67 (d, *J* = 6.0 Hz, 1H), 4.49 – 4.43 (m, 1H), 4.29 – 4.24 (m, 1H), 4.14 – 4.07 (m, 2H), 1.46 (s, 6H), 1.39 (s, 3H), 1.31 (s, 3H). **<sup>13</sup>C NMR** (100 MHz, CDCl<sub>3</sub>) δ (ppm): 138.7, 125.9, 114.8, 112.5, 109.0, 101.0, 85.4, 79.9, 79.5, 73.2, 66.4, 26.6, 25.6, 25.0, 24.2. **HRMS m/z (ESI)** calcd for C<sub>15</sub>H<sub>21</sub>N<sub>4</sub>O<sub>2</sub> ([M+H]<sup>+</sup>) 362.1710, found 362.1712.

**1-((3a*S*,4*S*,6*R*,6a*S*)-6-((*R*)-2,2-dimethyl-1,3-dioxolan-4-yl)-2,2-dimethyltetrahydrofuro[3,4-*d*][1,3]dioxol-4-yl)-1*H*-indazole (3af)**

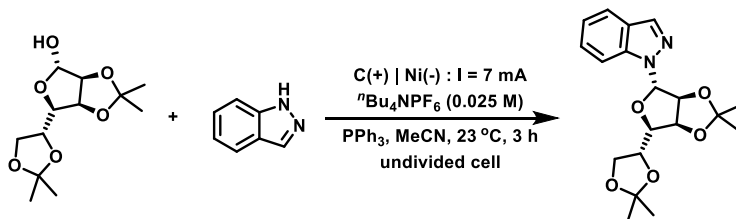

The starting (3a*S*,4*S*,6*R*,6a*S*)-6-((*R*)-2,2-dimethyl-1,3-dioxolan-4-yl)-2,2-dimethyltetrahydrofuro[3,4-*d*][1,3]dioxol-4-ol (105 mg, 0.4 mmol) was reacted with 1*H*-indazole (36 mg, 0.30 mmol) and PPh<sub>3</sub> (105 mg, 0.4 mmol) according to General Procedure. Water (10 mL) was added to the reaction mixture and extracted with

ethyl acetate (10 mL  $\times$  3). The crude product was purified by column chromatography (petroleum ether/ethyl acetate = 5:1) to afford the title compound as a white solid in 82% yield (89 mg). ( $\alpha$ : $\beta$  = 10:1) Rf (petroleum ether/ethyl acetate = 3:1): 0.2; **<sup>1</sup>H NMR** (400 MHz, CDCl<sub>3</sub>)  $\delta$  (ppm): 8.09 (s, 1H), 7.79 – 7.75(m, 1H), 7.52 – 7.48 (m, 1H), 7.42 – 7.36 (m, 1H), 7.19 – 7.15 (m, 1H), 5.44 (s, 1H), 4.86 – 4.78 (m, 1H), 4.64 (d,  $J$  = 5.9 Hz, 1H), 4.47 – 4.41 (m, 1H), 4.31 – 4.24 (m, 1H), 4.15 – 4.04 (m, 2H), 1.47 (s, 6H), 1.40 (s, 3H), 1.32 (s, 3H). **<sup>13</sup>C NMR** (100 MHz, CDCl<sub>3</sub>)  $\delta$  (ppm): 139.9, 134.4, 126.8, 123.0, 120.9, 120.8, 112.5, 109.7, 108.9, 101.0, 85.4, 79.9, 79.5, 73.3, 66.3, 26.6, 25.7, 25.1, 24.3. **HRMS m/z (ESI)** calcd for C<sub>16</sub>H<sub>22</sub>N<sub>3</sub>O<sub>2</sub> ([M+H]<sup>+</sup>) 361.1758, found 361.1760.

**1-((3a*S*,4*S*,6*R*,6a*S*)-6-((*R*)-2,2-dimethyl-1,3-dioxolan-4-yl)-2,2-dimethyltetrahydrofuro[3,4-*d*][1,3]dioxol-4-yl)-3,5-diphenyl-1*H*-pyrazole (3ag)**

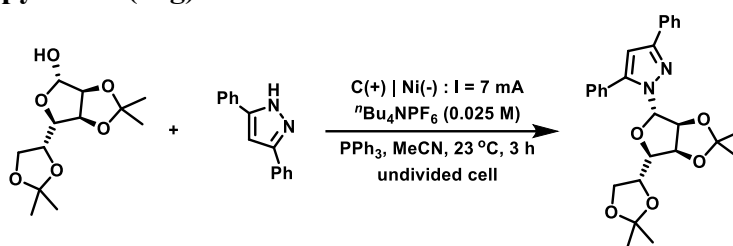

The starting (3a*S*,4*S*,6*R*,6a*S*)-6-((*R*)-2,2-dimethyl-1,3-dioxolan-4-yl)-2,2-dimethyltetrahydrofuro[3,4-*d*][1,3]dioxol-4-ol (105 mg, 0.4 mmol) was reacted with 3,5-diphenyl-1*H*-pyrazole (66 mg, 0.30 mmol) and PPh<sub>3</sub> (105 mg, 0.4 mmol) according to General Procedure. Water (10 mL) was added to the reaction mixture and extracted with ethyl acetate (10 mL  $\times$  3). The crude product was purified by column chromatography (petroleum ether/ethyl acetate = 5:1) to afford the title compound as a white solid in 90% yield (125 mg). ( $\alpha$ : $\beta$  = 5:1)

Rf (petroleum ether/ethyl acetate = 3:1): 0.2; **<sup>1</sup>H NMR** (400 MHz, CDCl<sub>3</sub>)  $\delta$  (ppm): 7.73 – 7.68 (m, 4H), 7.38 – 7.28 (m, 6H), 6.81 (s, 1H), 5.42 (s, 1H), 4.81 – 4.77 (m, 1H), 4.62 (d,  $J$  = 5.9 Hz, 1H), 4.44 – 4.38 (m, 1H), 4.25 – 4.21 (m, 1H), 4.10 – 4.00 (m, 2H), 1.46 (s, 3H), 1.41 (s, 3H), 1.36 (s, 3H), 1.30 (s, 3H). **<sup>13</sup>C NMR** (100 MHz, CDCl<sub>3</sub>)  $\delta$  (ppm): 148.7, 131.0, 128.8, 128.2, 125.6, 112.5, 109.0, 101.2, 100.2, 85.4, 80.1, 79.6, 73.2, 66.4, 26.7, 25.7, 25.1, 24.3. **HRMS m/z (ESI)** calcd for C<sub>24</sub>H<sub>28</sub>N<sub>3</sub>O<sub>2</sub> ([M+H]<sup>+</sup>) 463.2227, found 463.2226.

#### **4. Procedure for cyclic voltammetry (CV)**

Cyclic voltammetry was performed in a three-electrode cell under air at room temperature. A steady glassy carbon disk electrode (3 mm in diameter) was used as the working electrode; a platinum plate was used as

the counter electrode; the reference was an Ag/AgNO<sub>3</sub> electrode with (0.01 M) AgNO<sub>3</sub> in acetonitrile. 8 mL acetonitrile solvent containing (0.025 M) <sup>n</sup>Bu<sub>4</sub>NPF<sub>6</sub> was used as the blank. The spectrums were recorded with the scan rate of 50 mV s<sup>-1</sup>, from 0 V to 3.0 V (starting from 0 V). The CV of PPh<sub>3</sub>, Boc-pyrrolidin-2-ol, and 4-nitro-1*H*-pyrazole were conducted respectively.

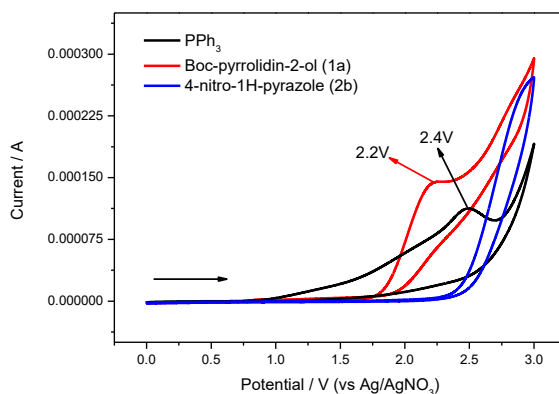

**Fig 1.** Cyclic voltammograms recorded in (0.025 M) <sup>n</sup>Bu<sub>4</sub>NPF<sub>6</sub>-MeCN solution: scan rate: 50 mV s<sup>-1</sup>; starting potential: 0 V; glass carbon (3 mm diameter, Working Electrode); platinum plate (Counter Electrode); Ag/AgNO<sub>3</sub> (0.01 M) AgNO<sub>3</sub> in MeCN (Reference Electrode); Concentrations: PPh<sub>3</sub> (0.2 mmol / 8 ml MeCN), Boc-pyrrolidin-2-ol (0.2 mmol / 8 ml MeCN) , 4-nitro-1*H*-pyrazole (0.15 mmol / 8 ml MeCN)

## 5. $^1\text{H}$ and $^{13}\text{C}$ NMR spectra

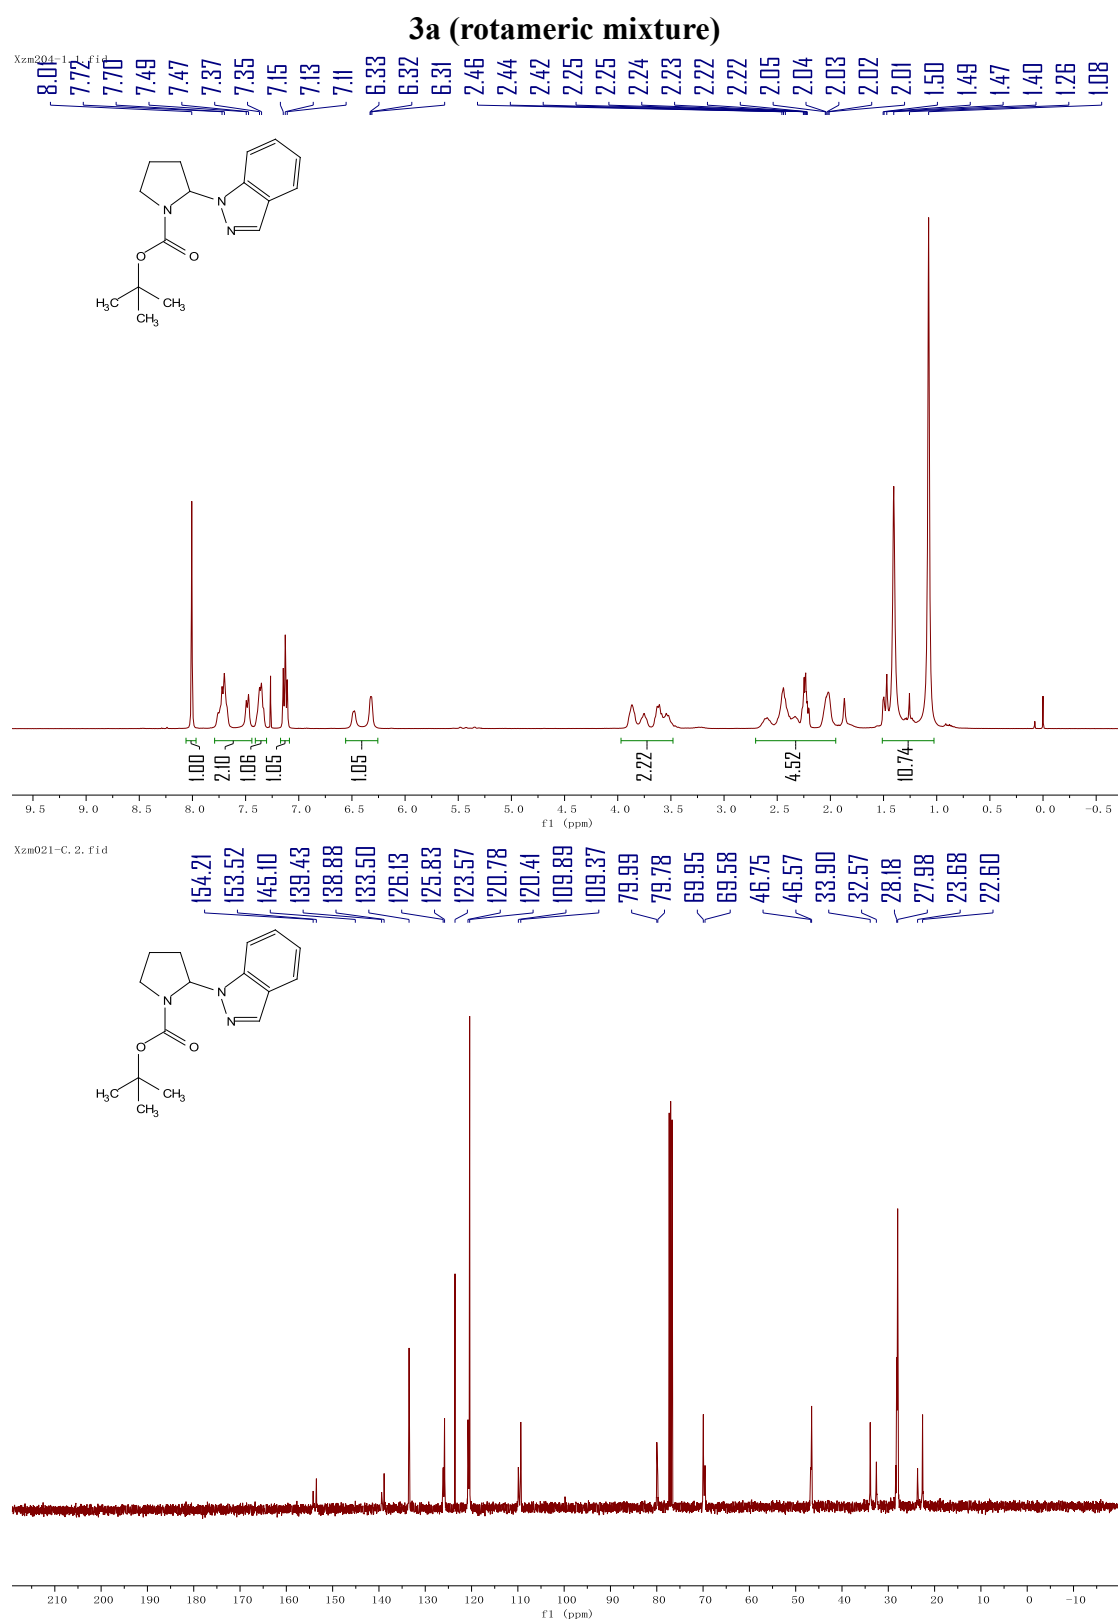

### 3b (rotameric mixture)

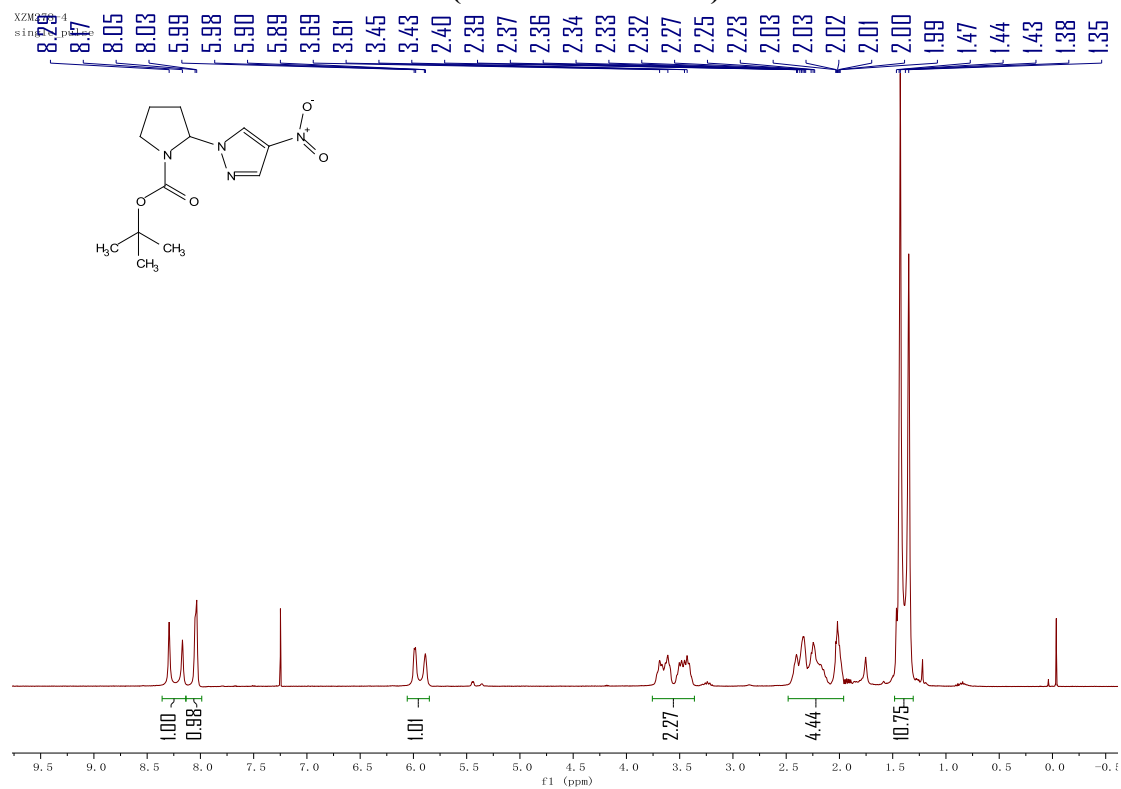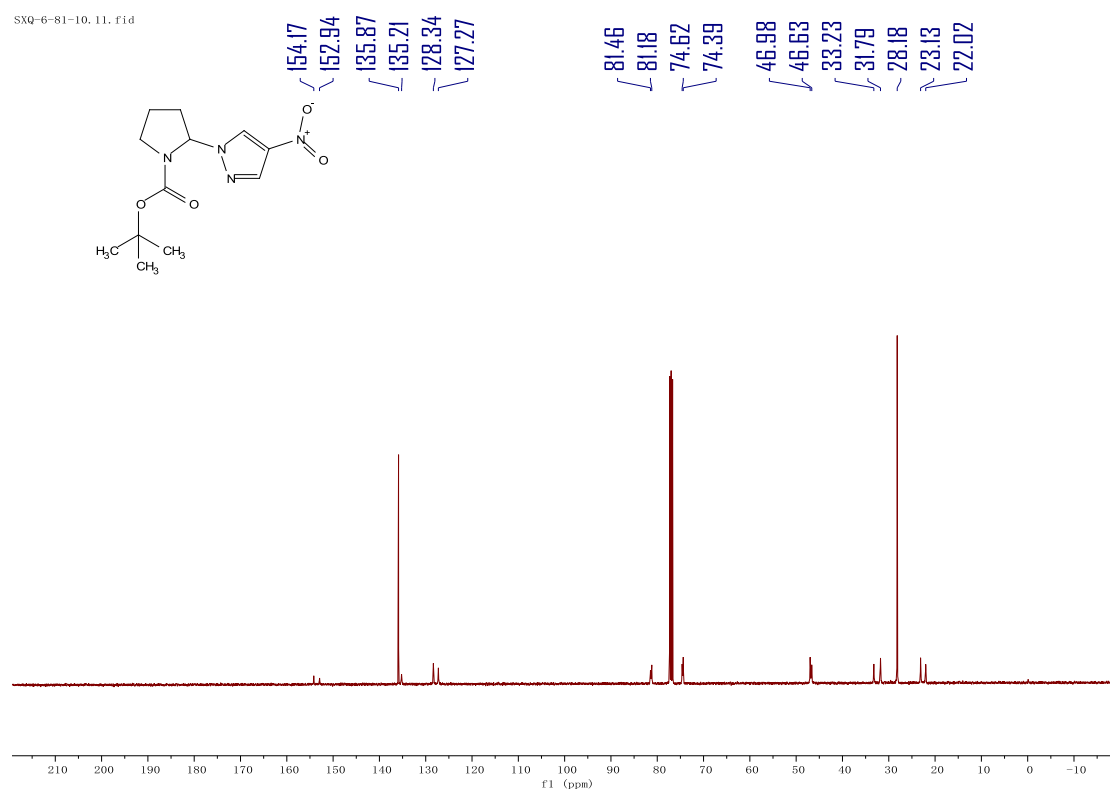

3c

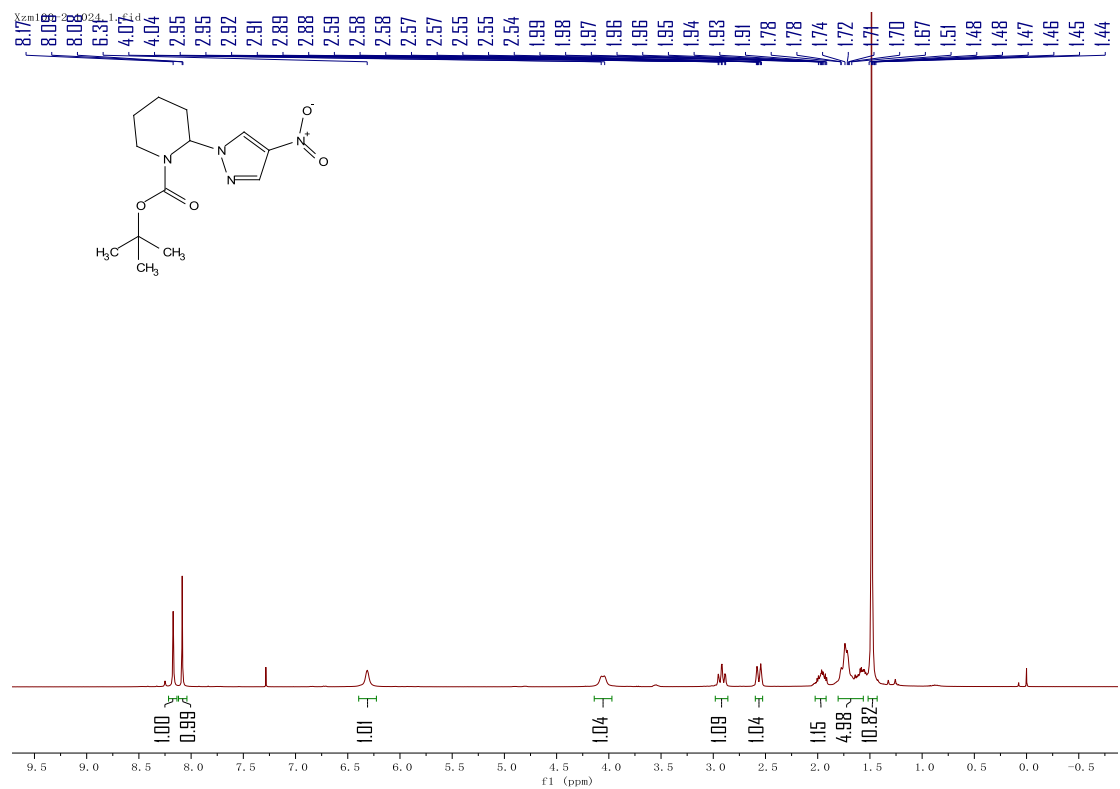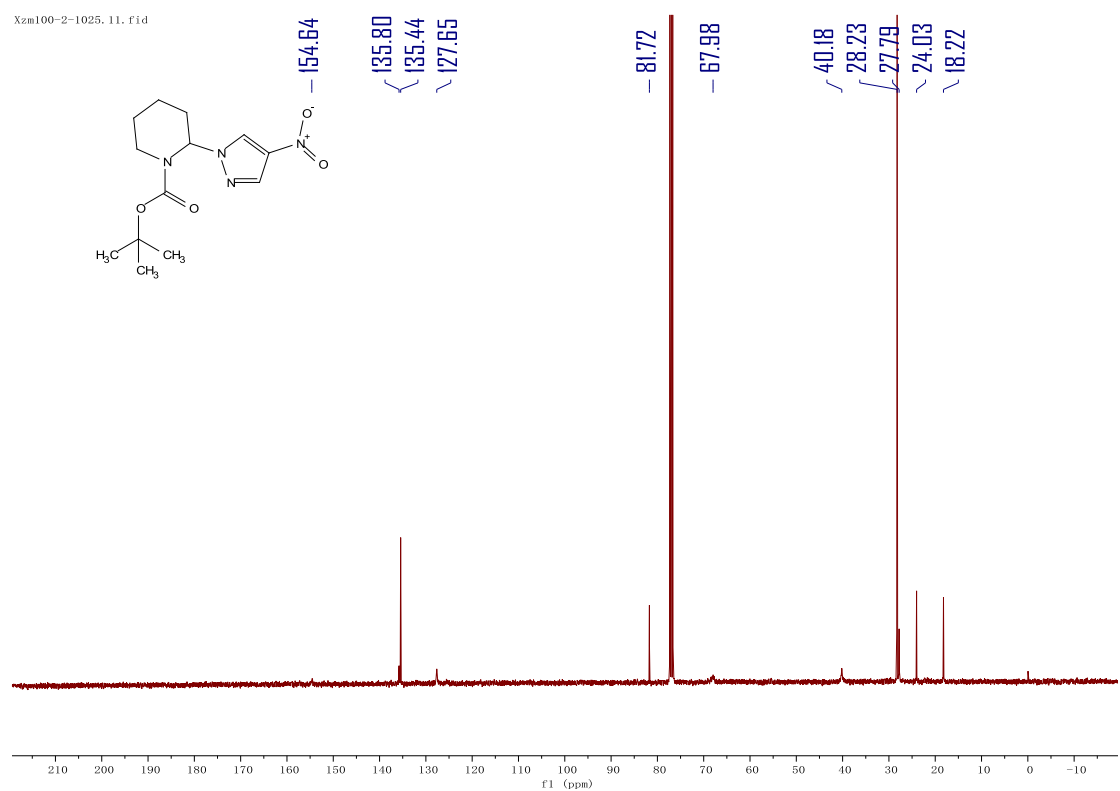

### 3d (rotameric mixture)

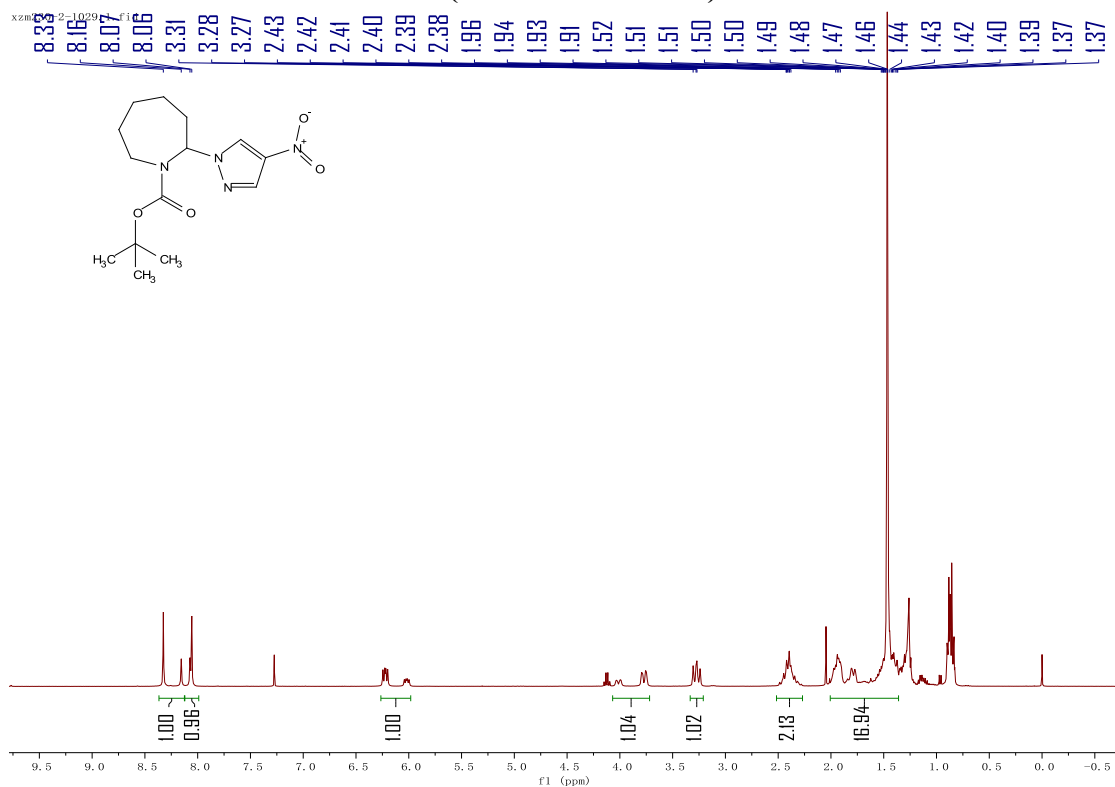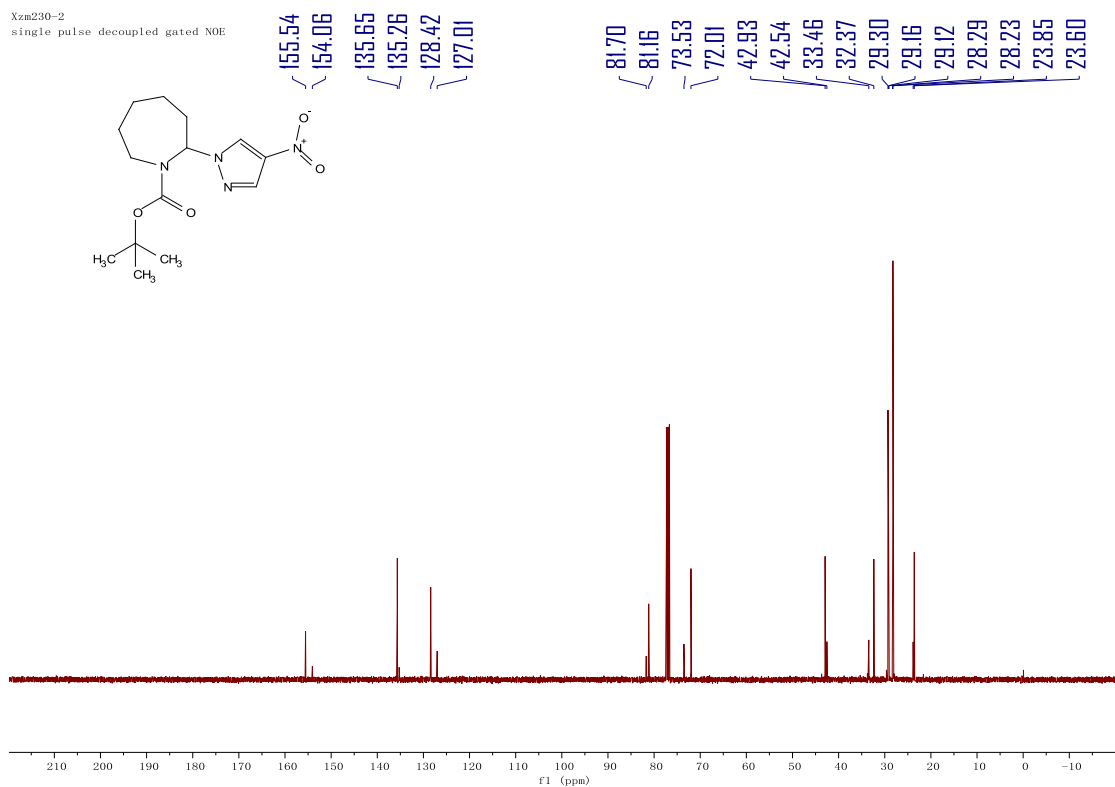

### 3e (rotameric mixture)

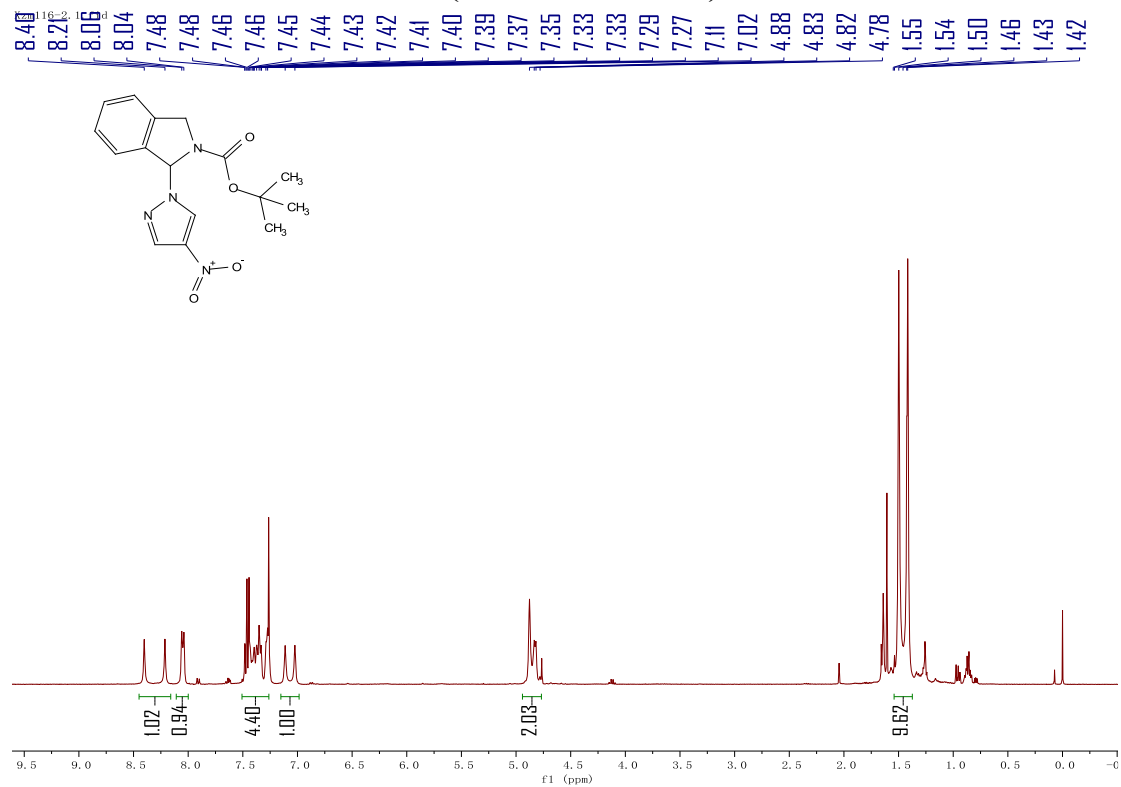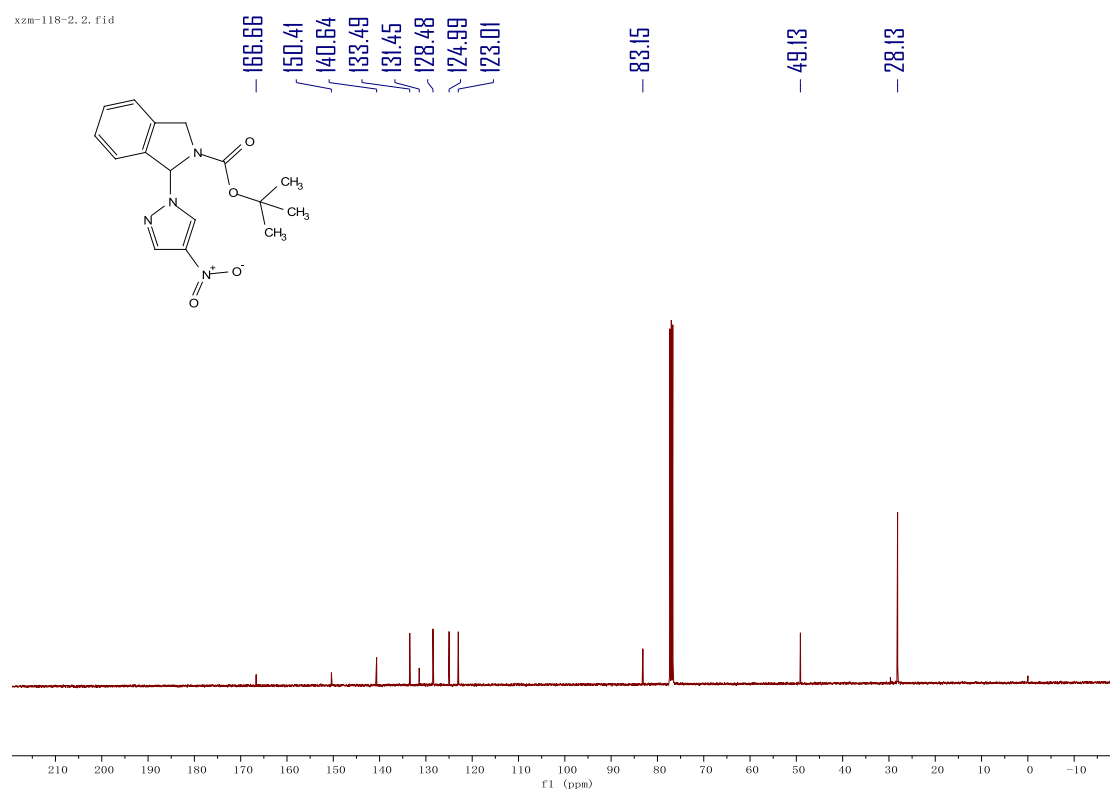

# 3f

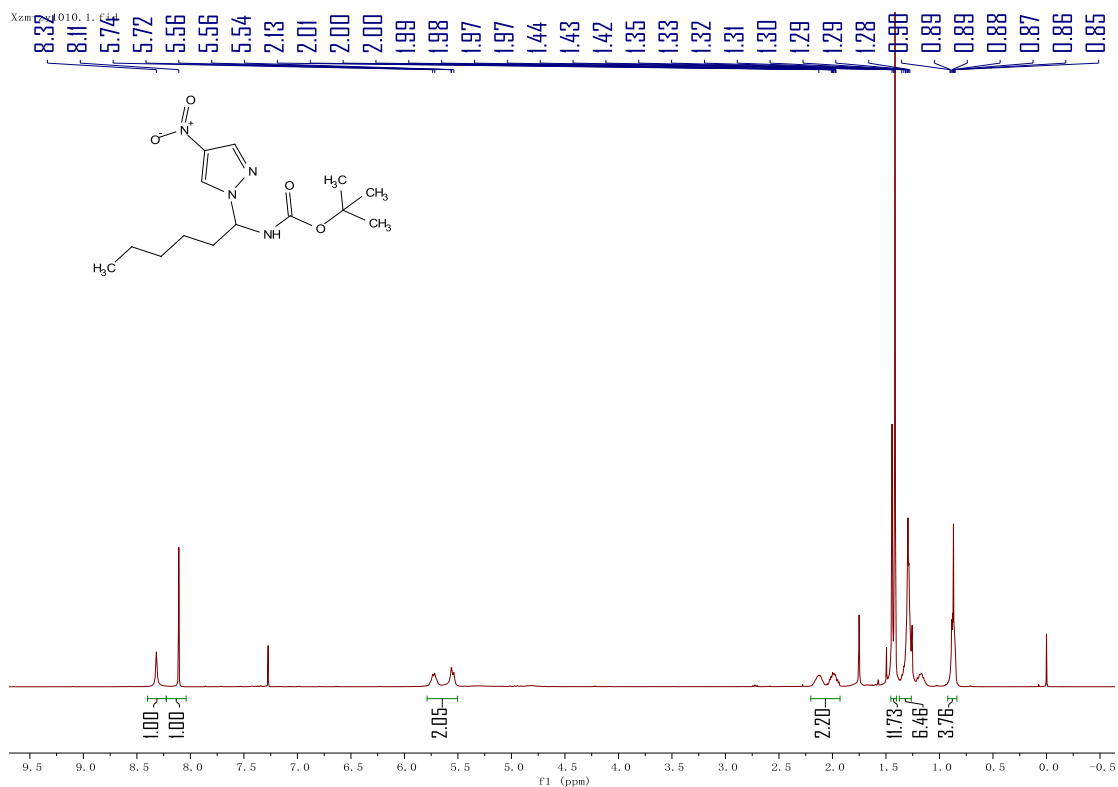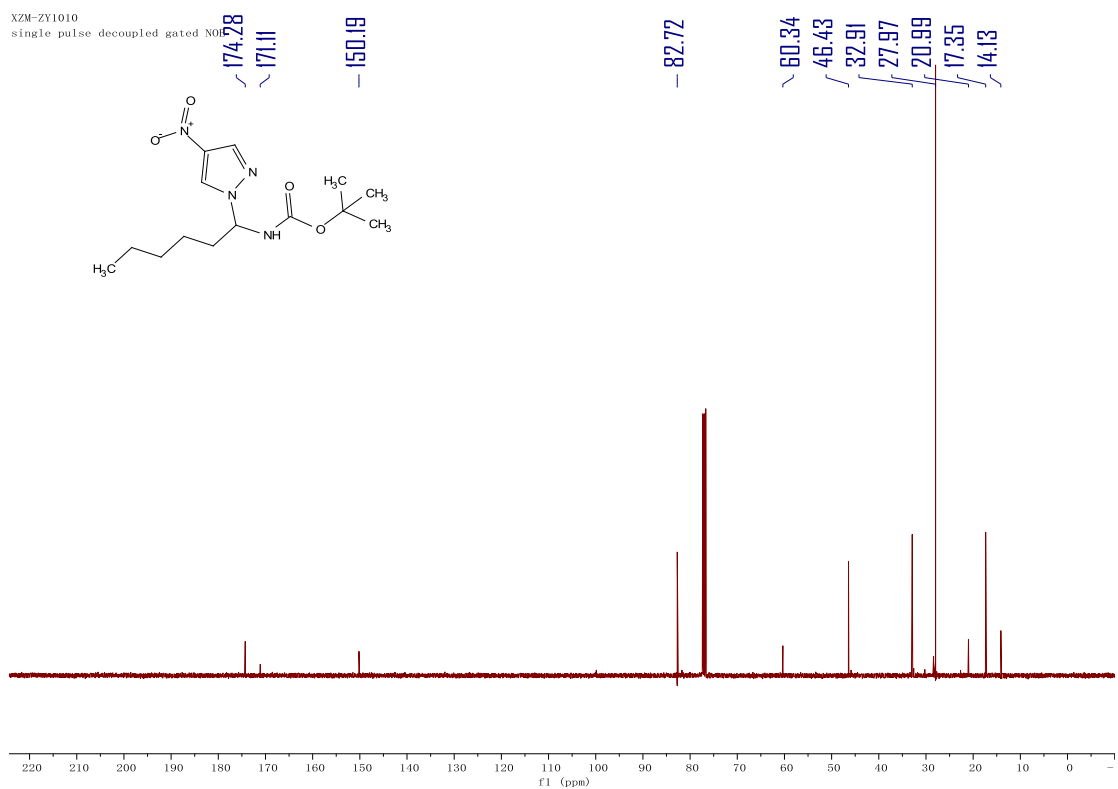

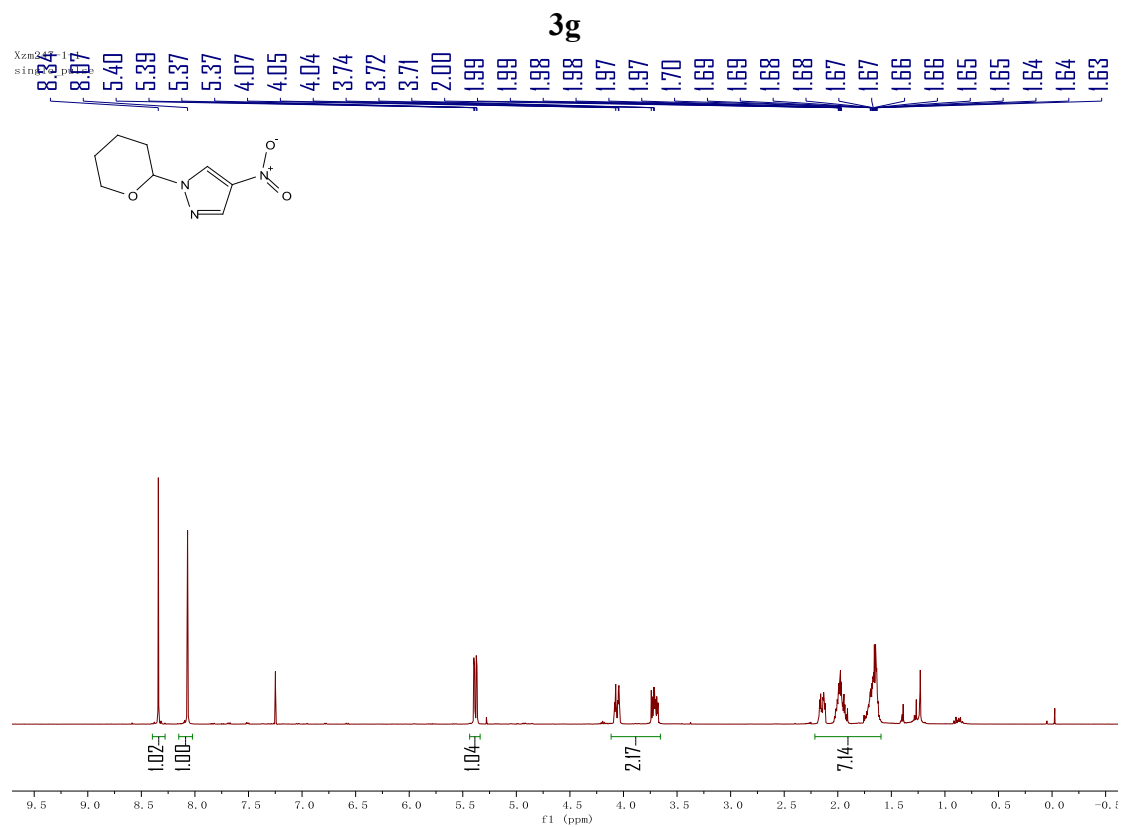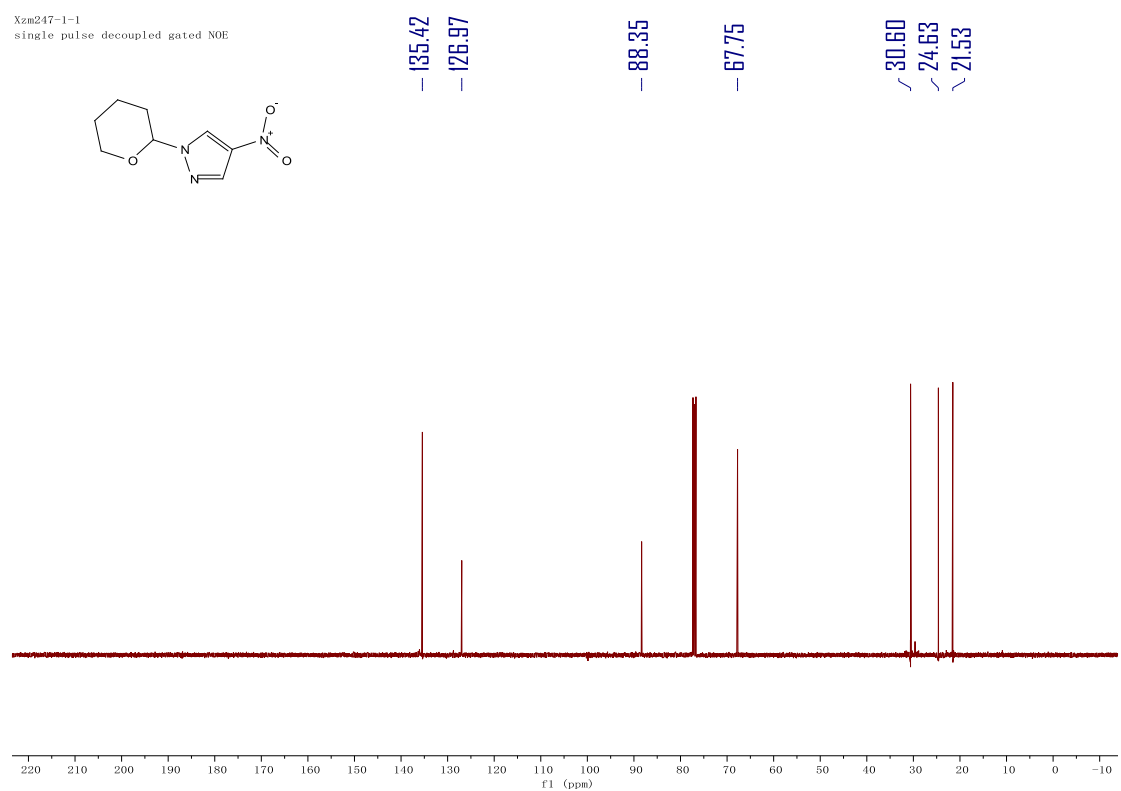

3h

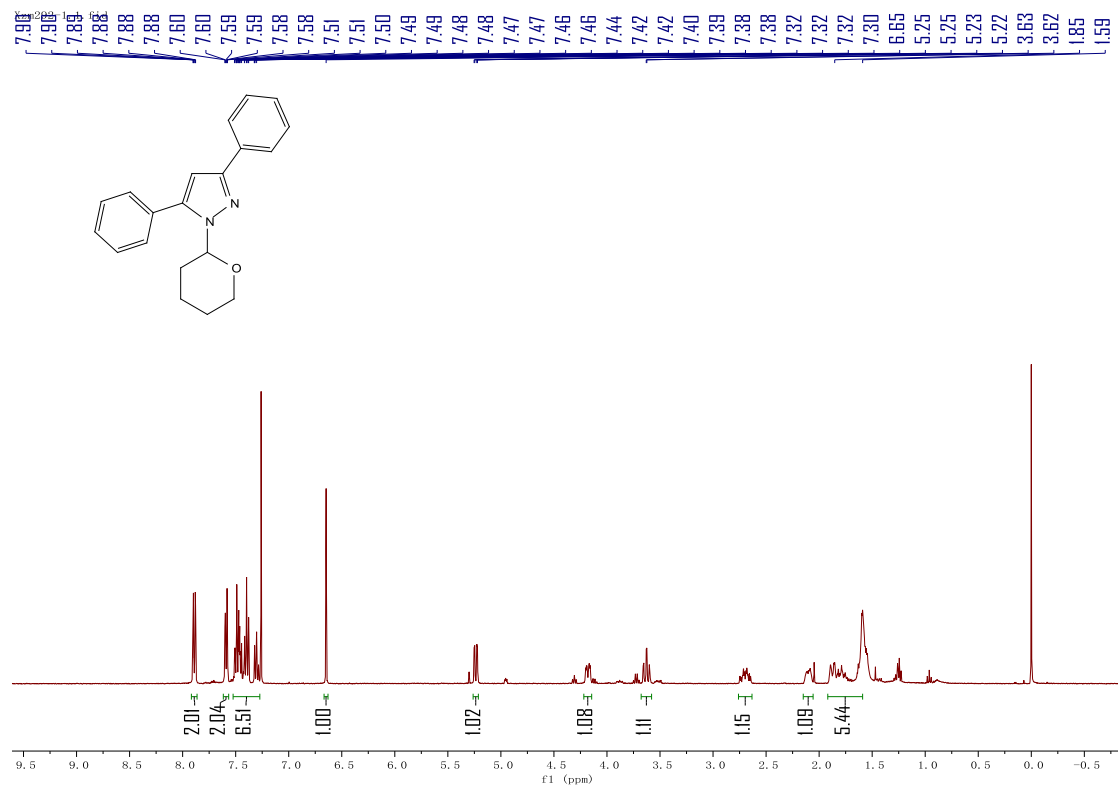

Xzm292-1  
single pulse decoupled

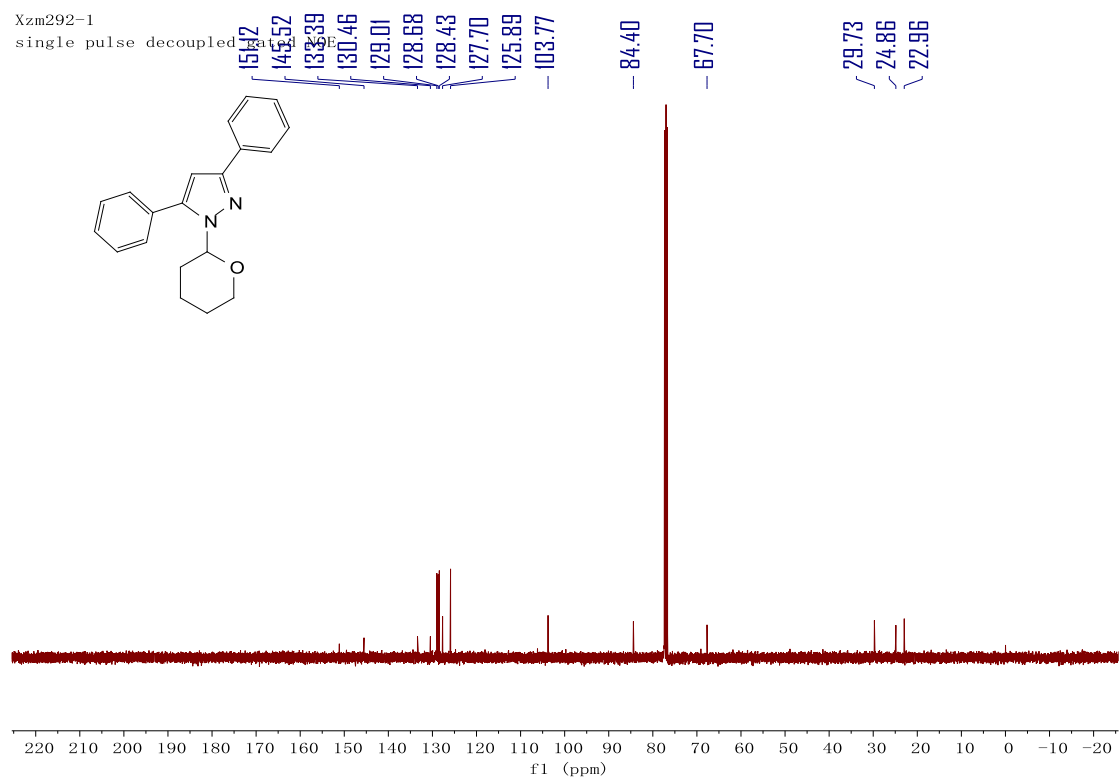

3i

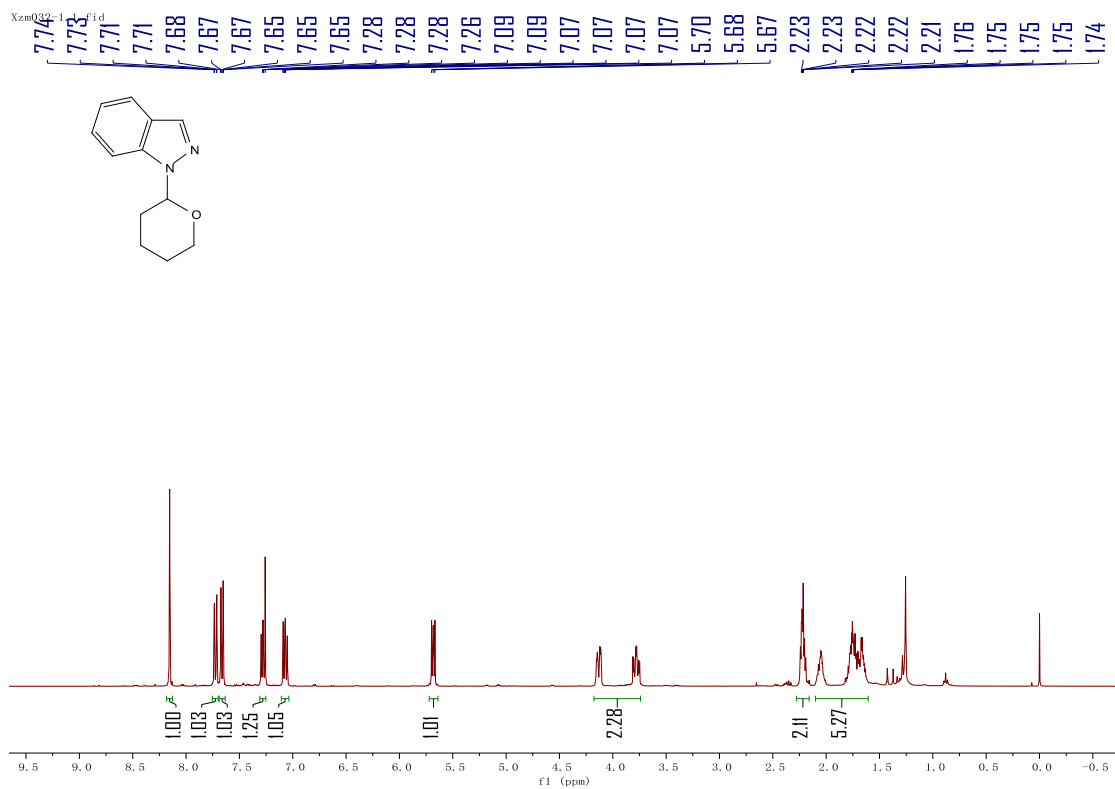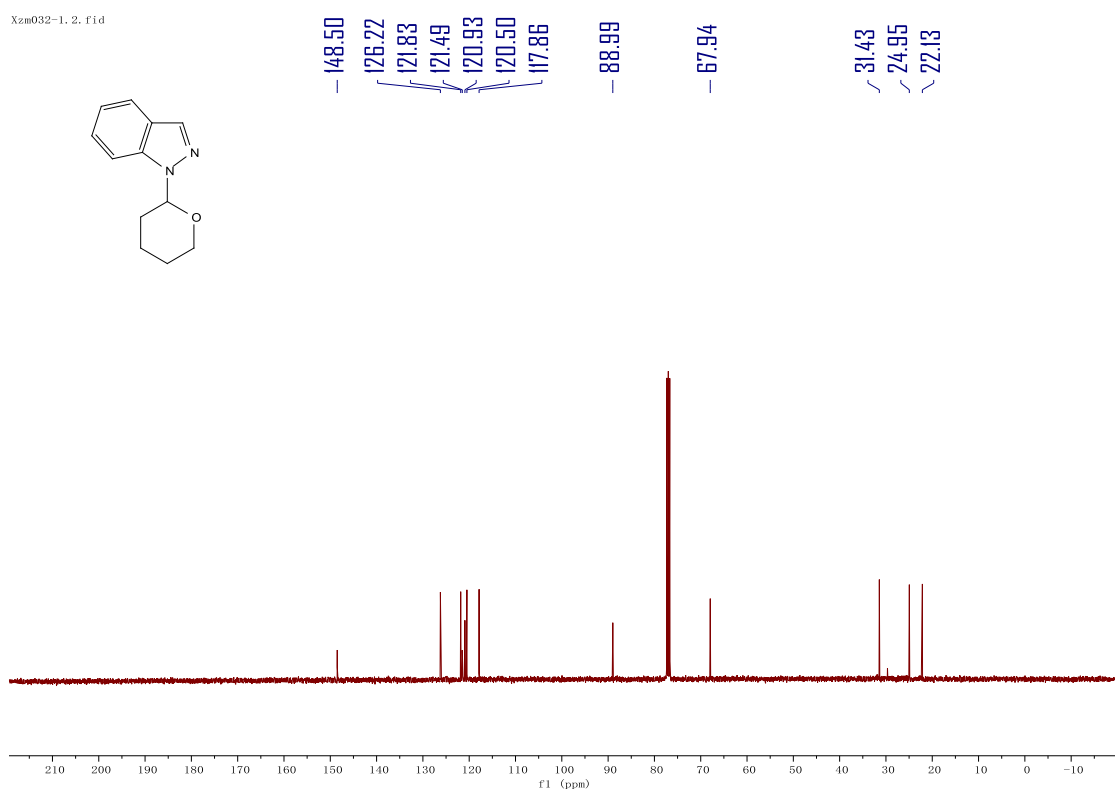

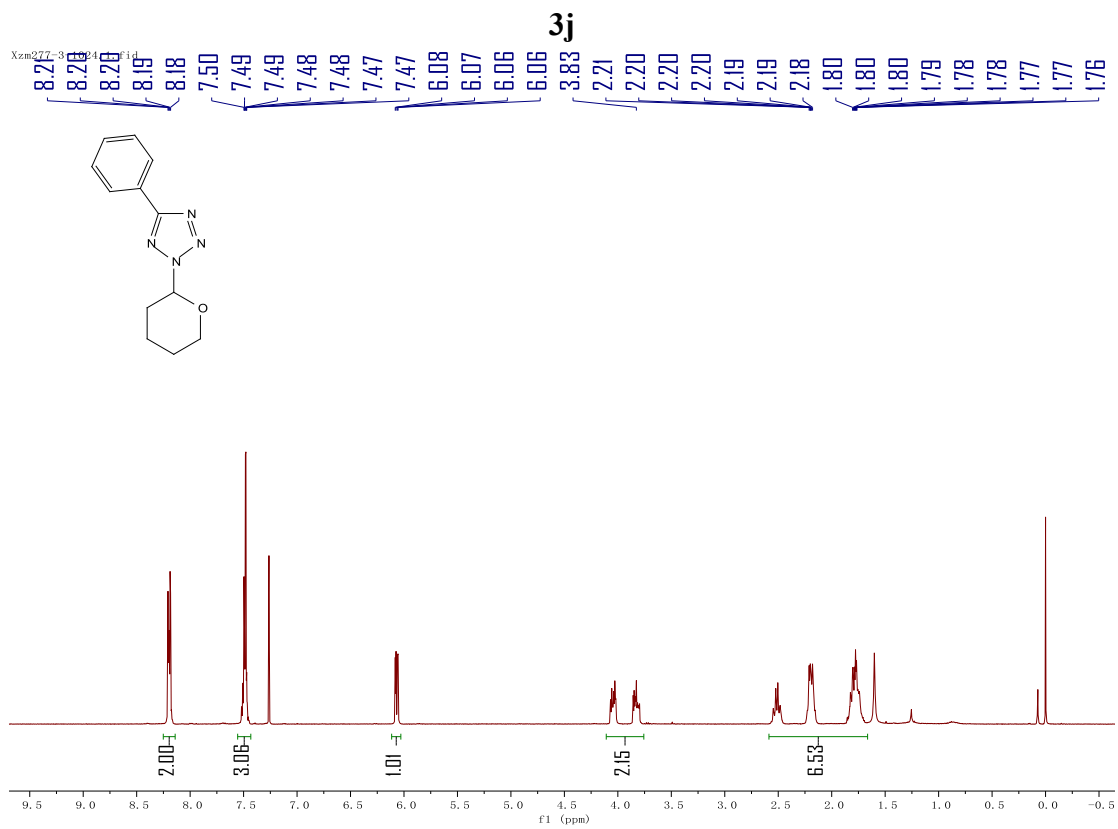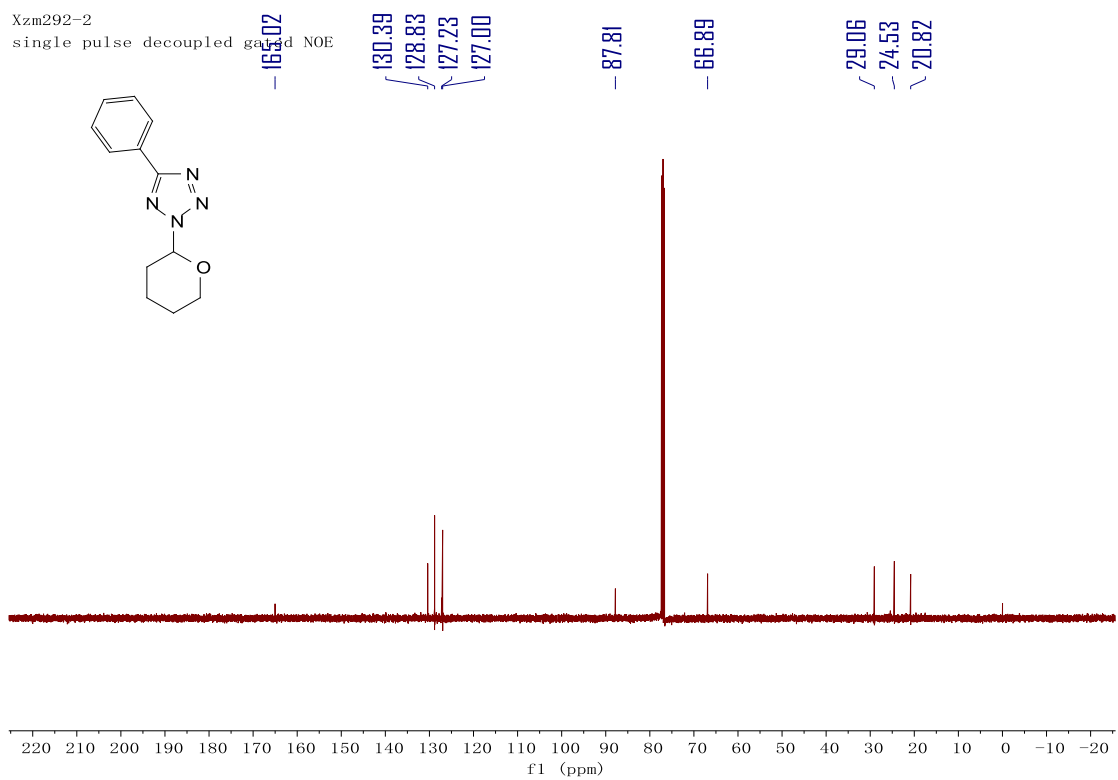

# 3k

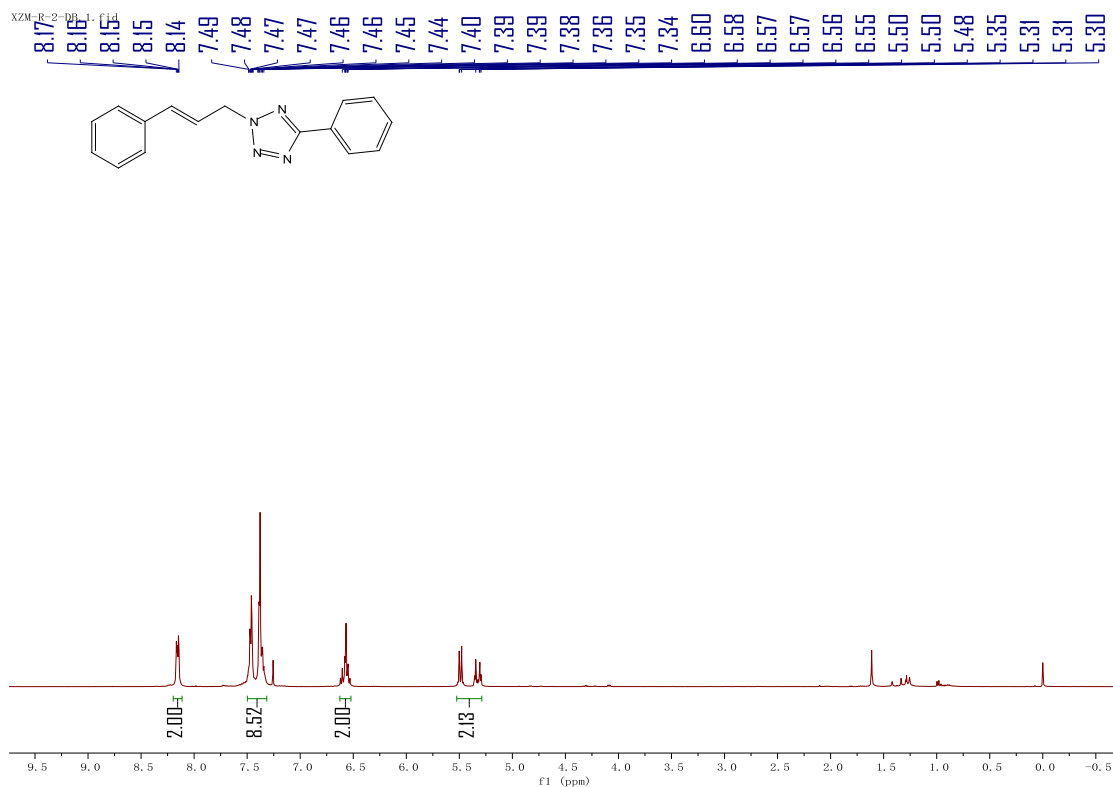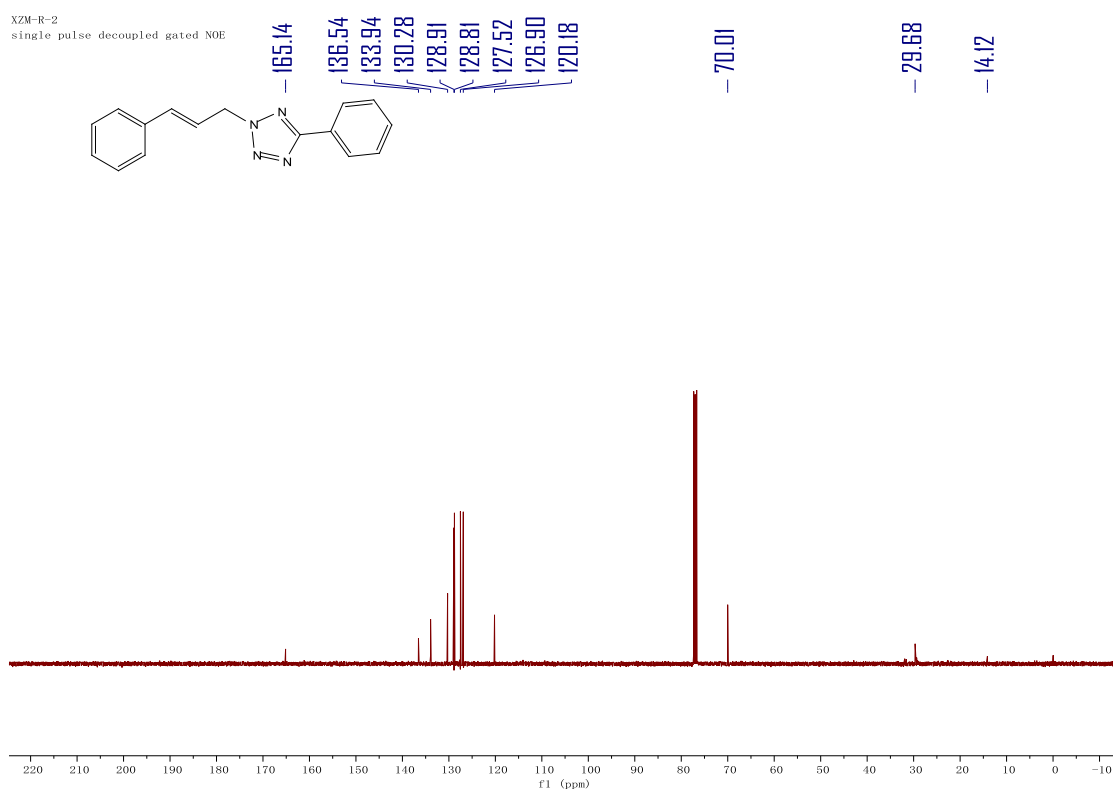

3l

WZH024-2-2  
single\_pulse

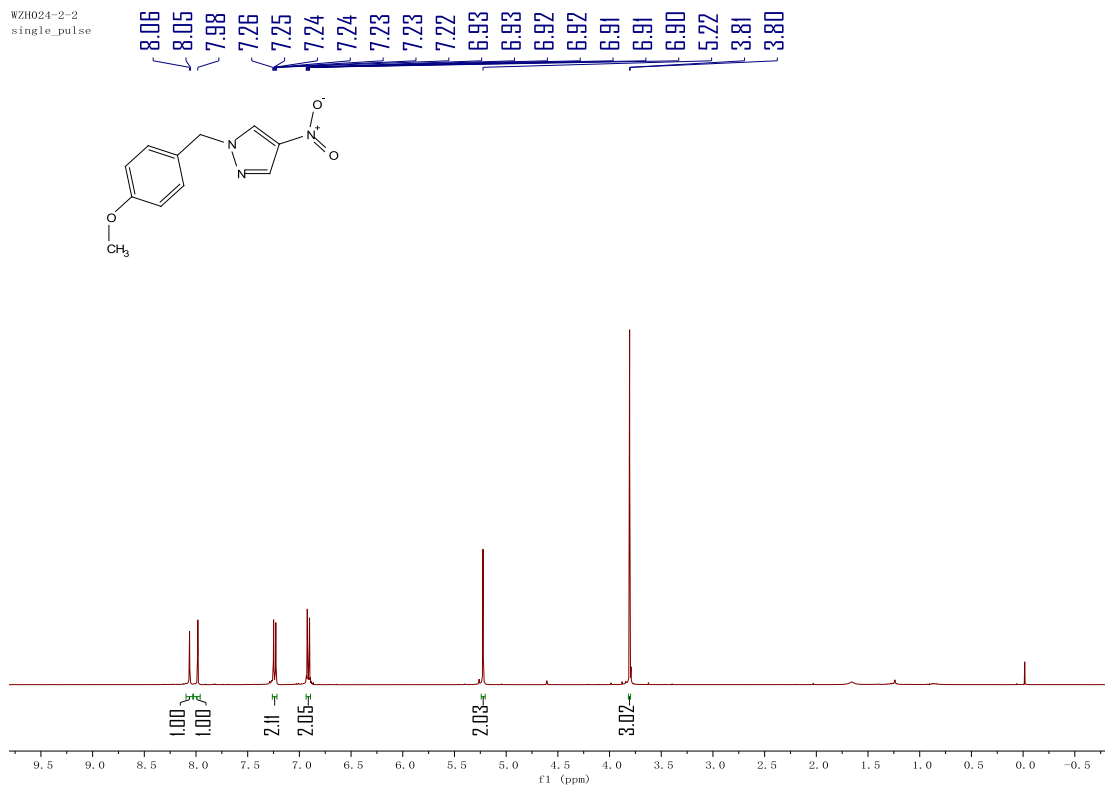

WZH024-2-2  
single pulse decoupled gated NOE

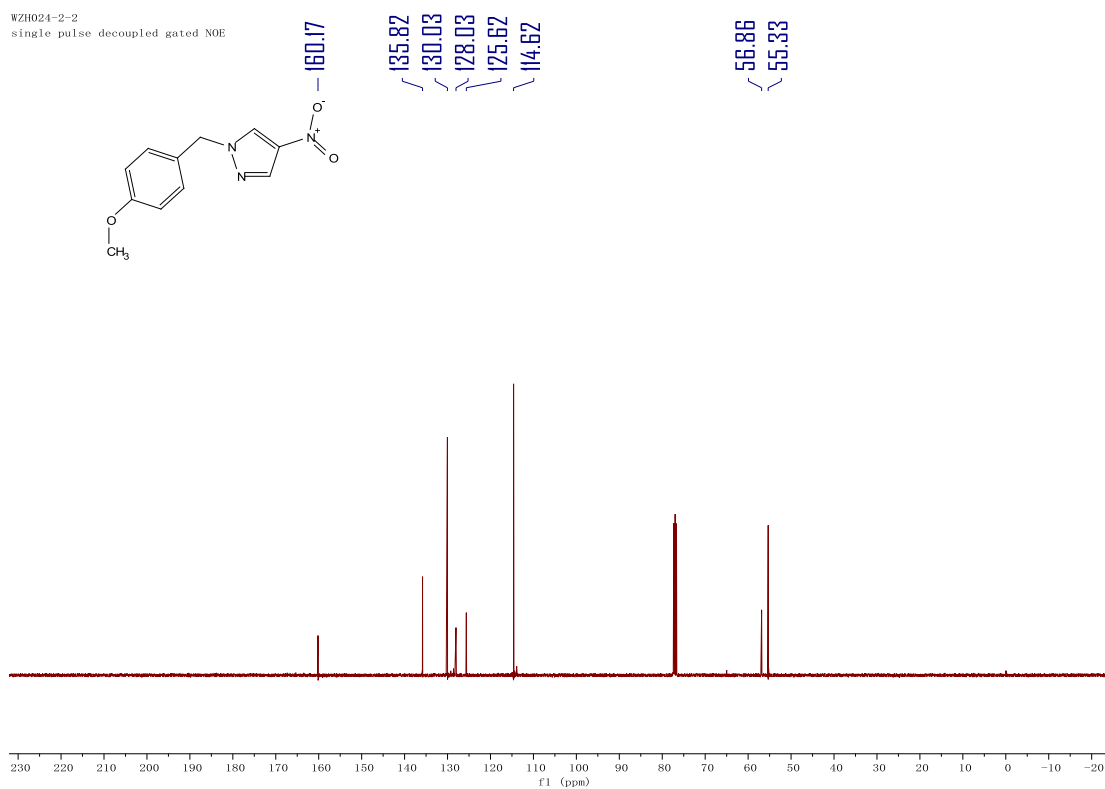

3m

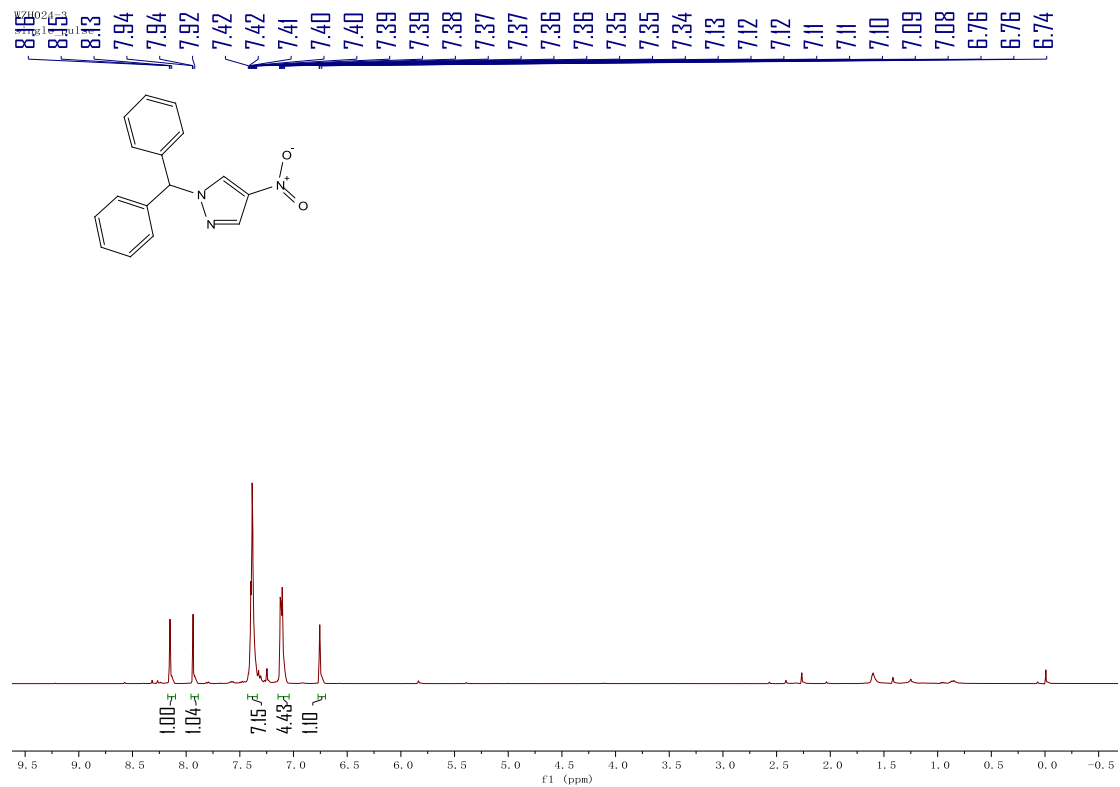

WZH024-3  
single pulse decoupled gated NOE

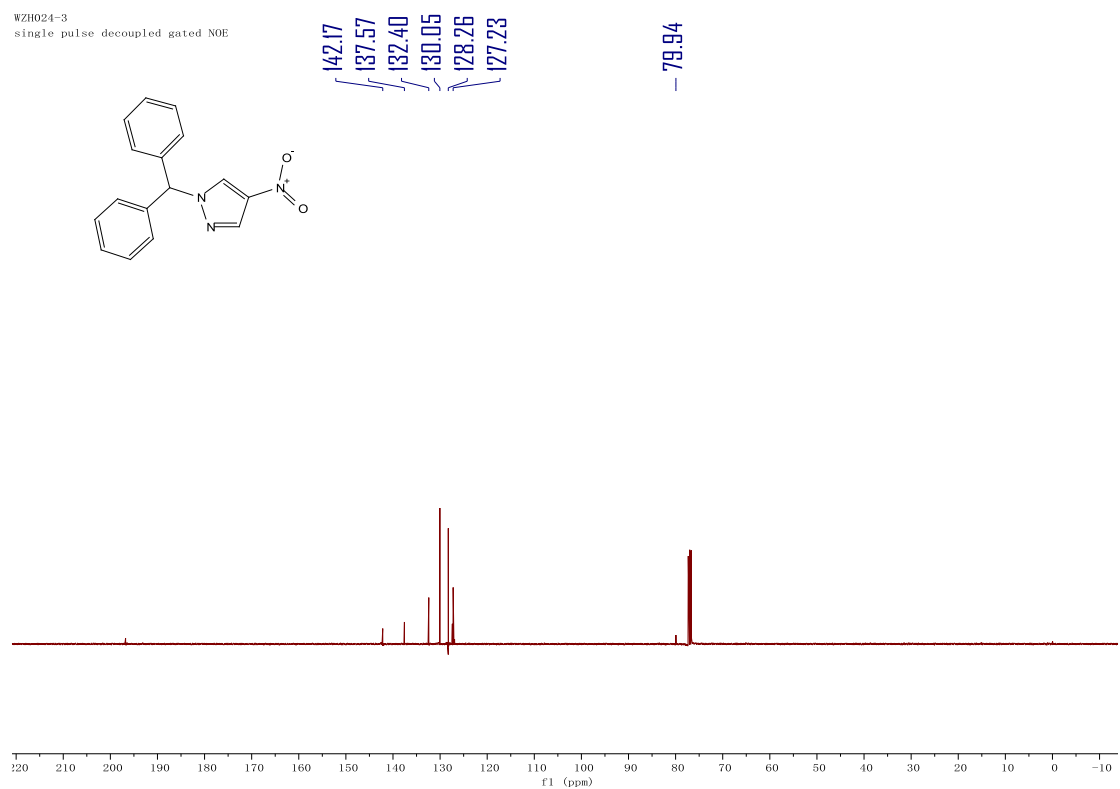

# 3n

Xzm101-2-1, 1, f1d

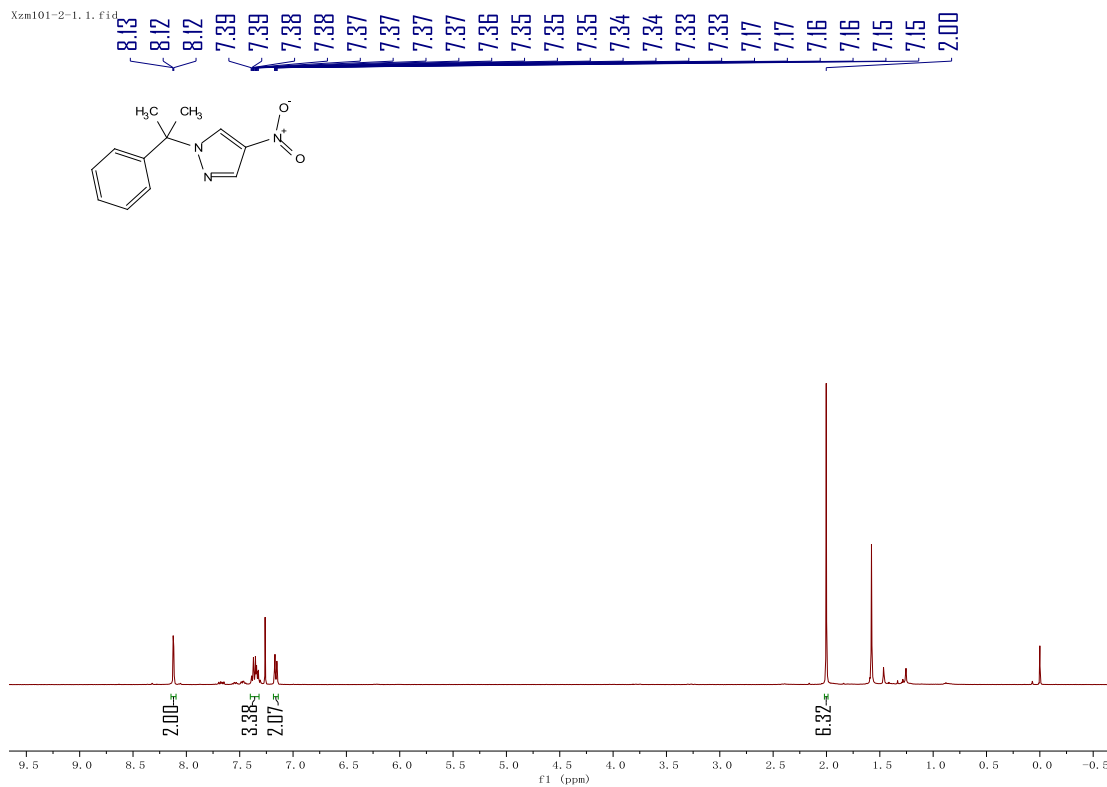

WZH-024-1, 1, f1d

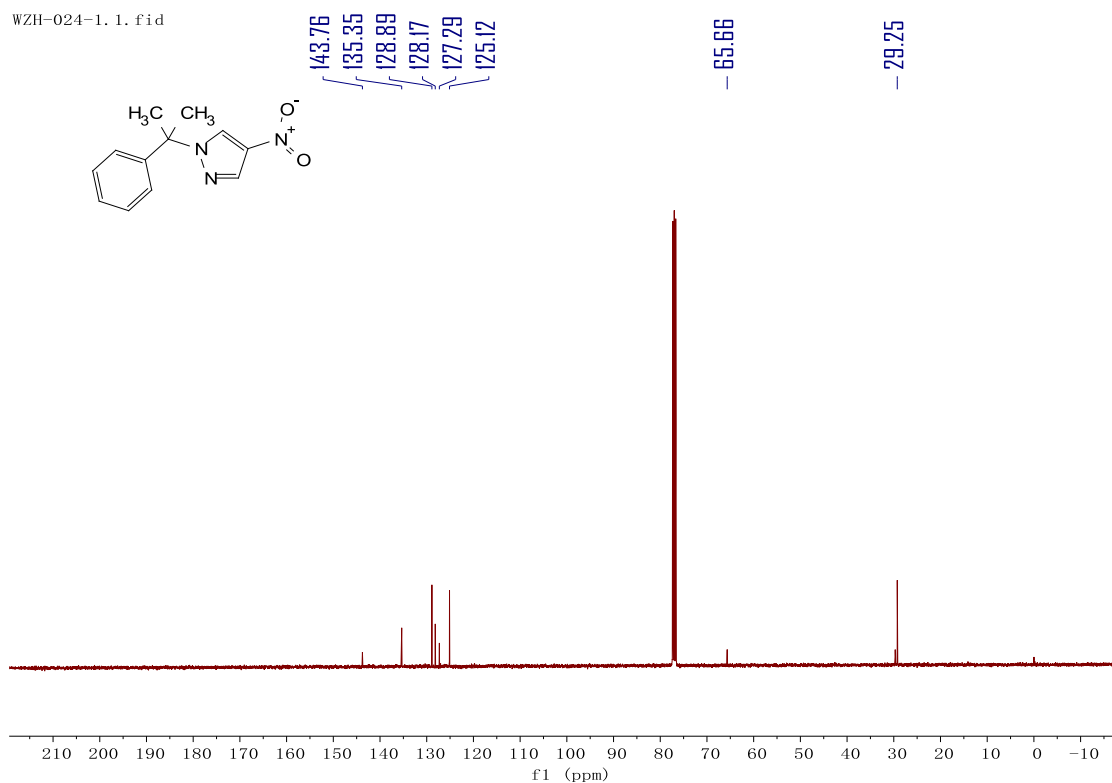

### 3o (rotameric mixture)

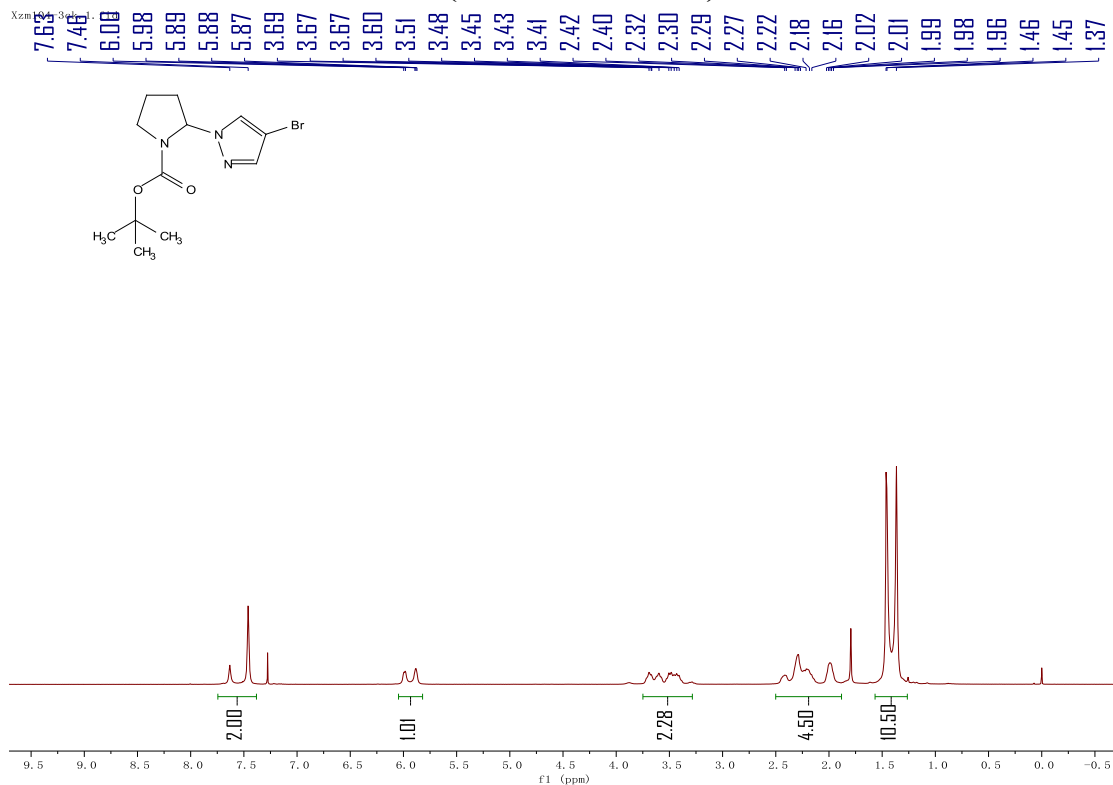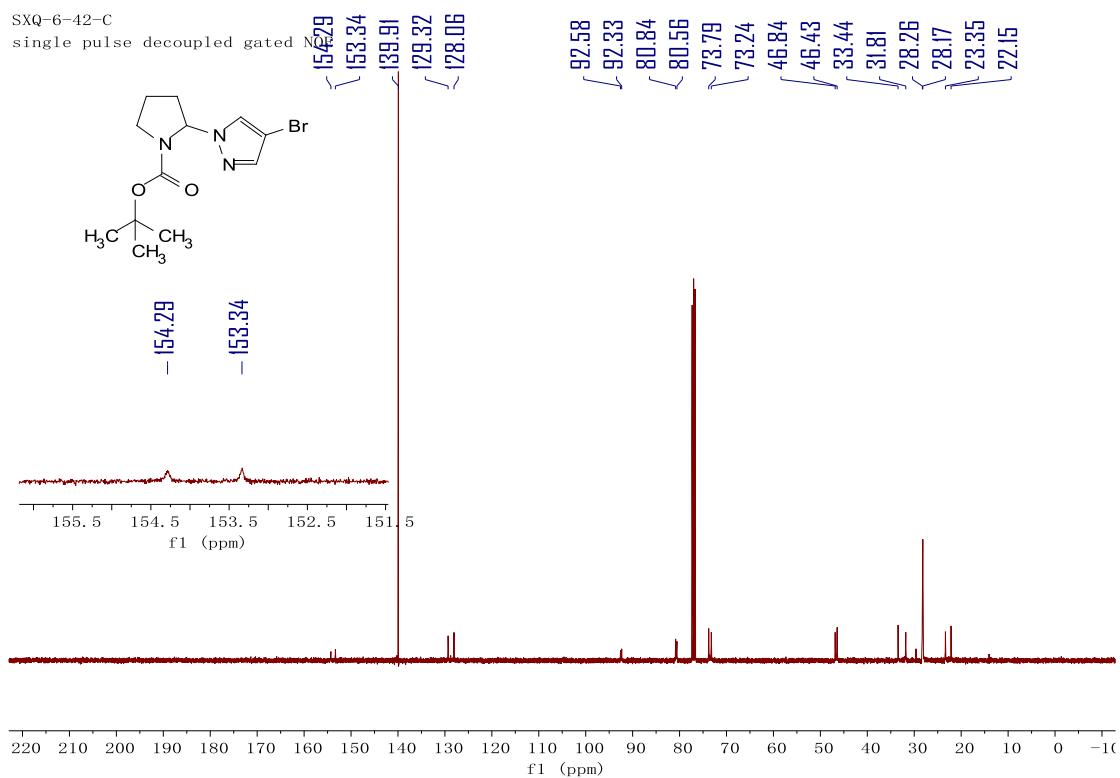

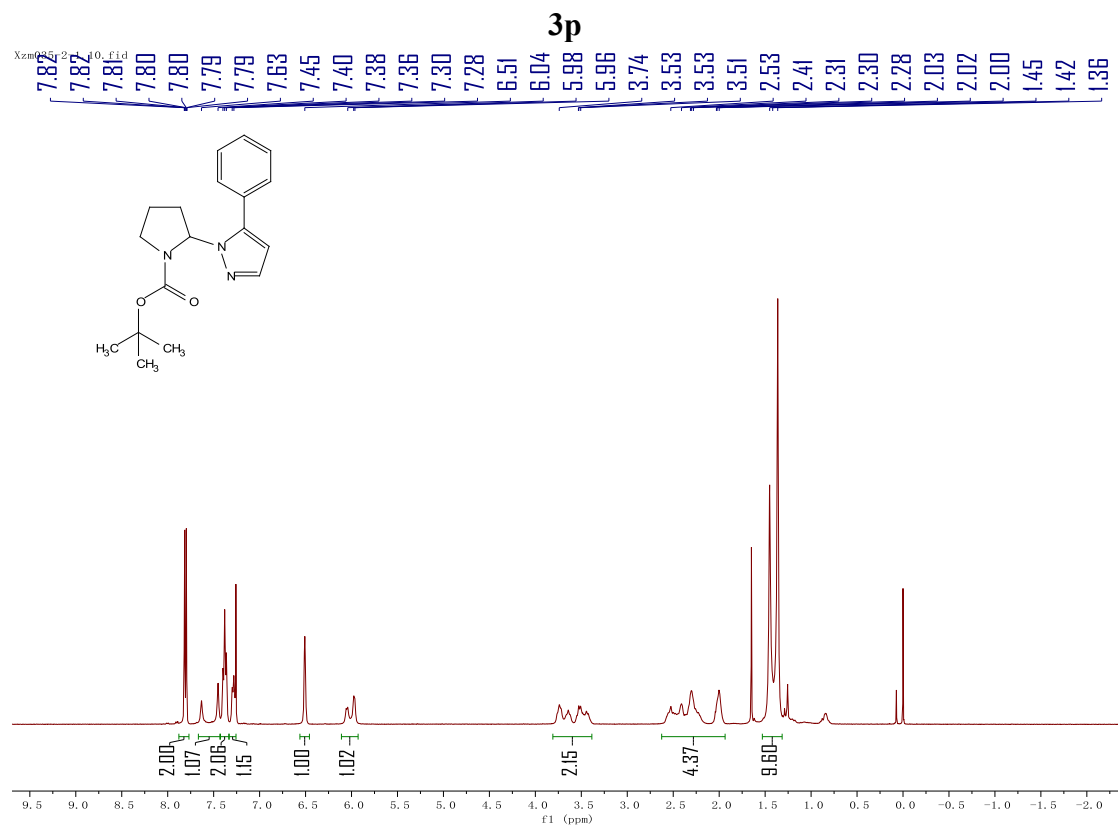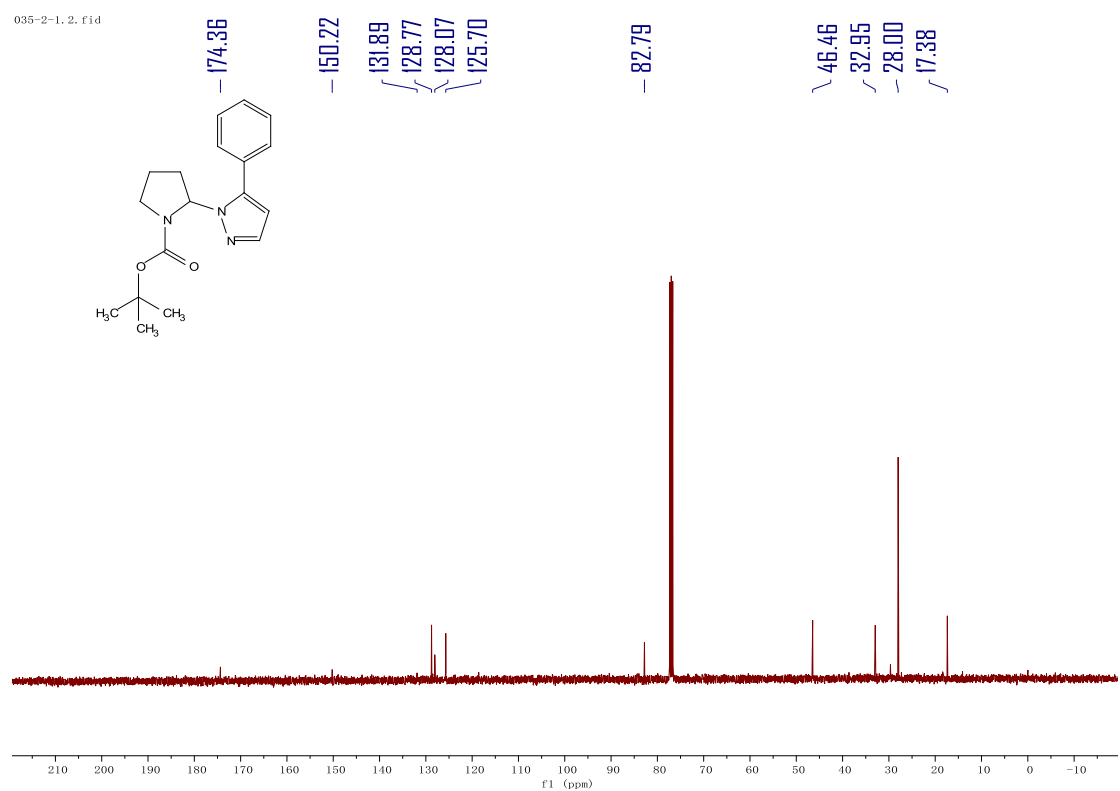

### 3q (rotameric mixture)

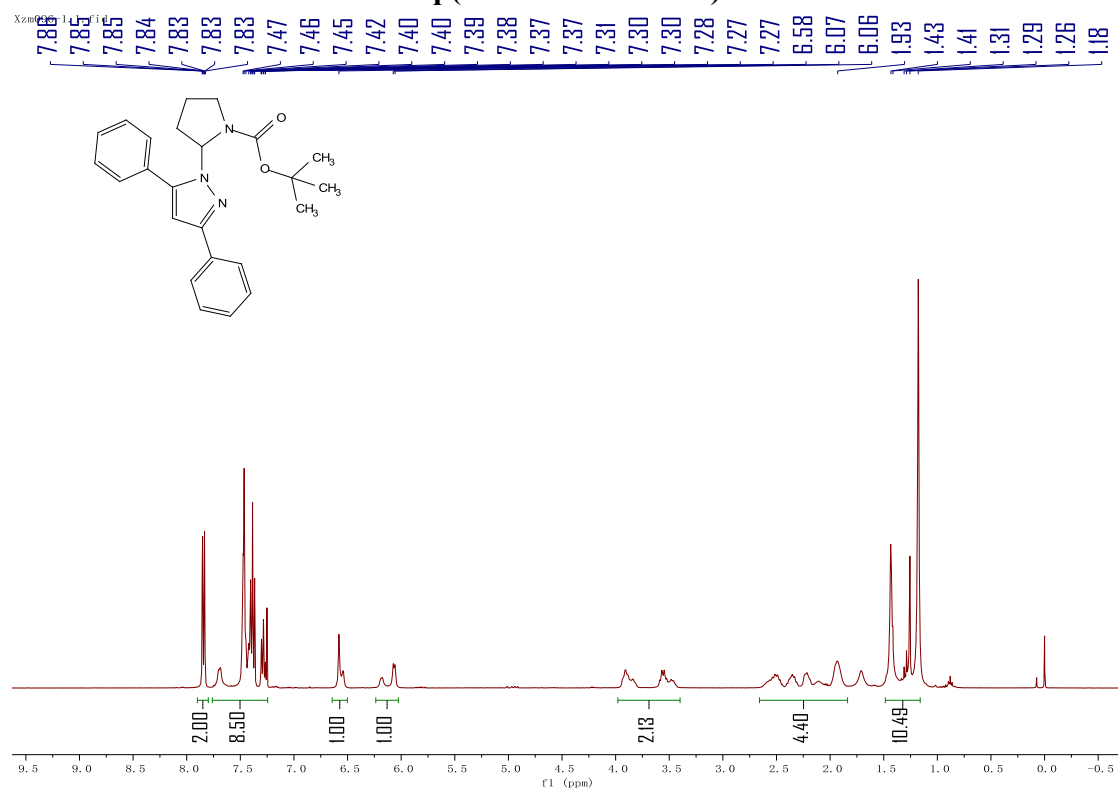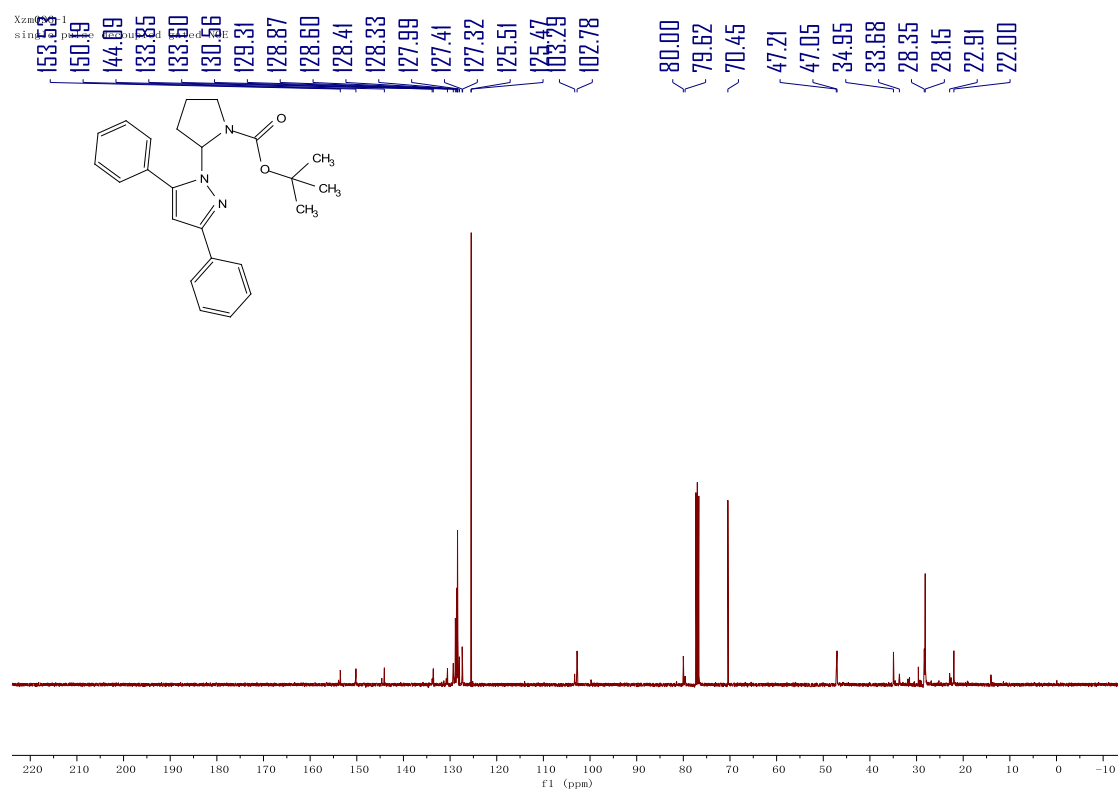

### 3r (rotameric mixture)

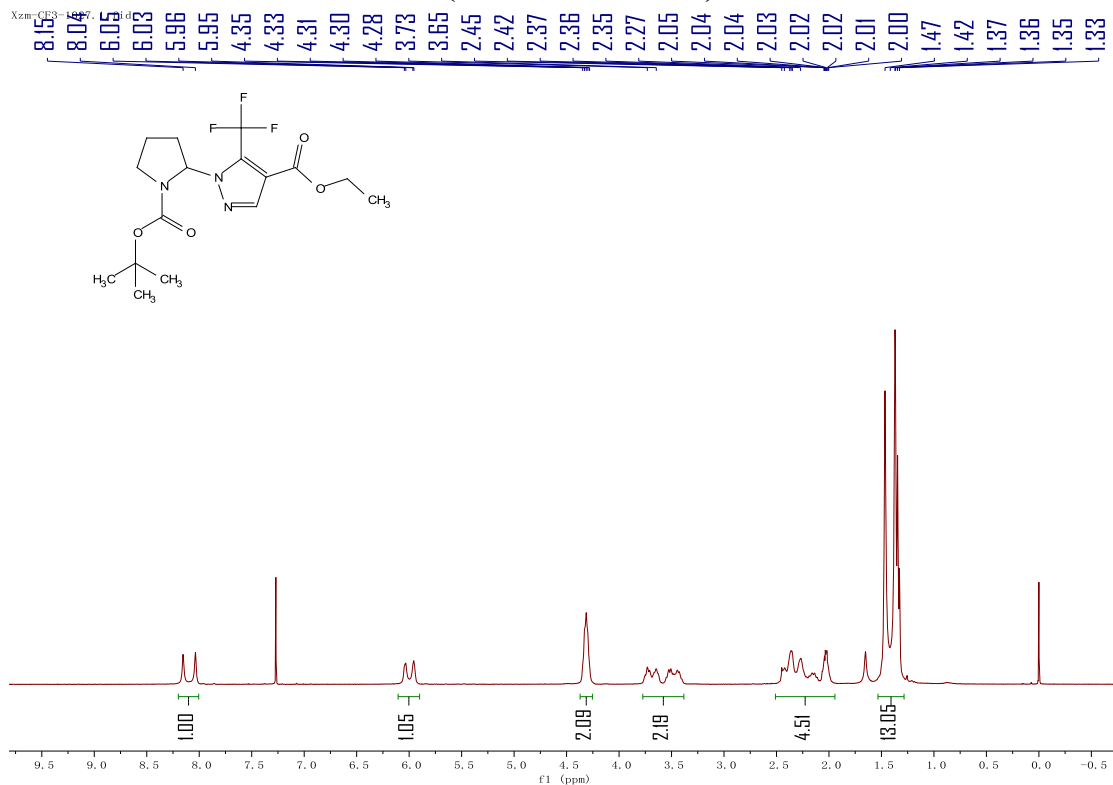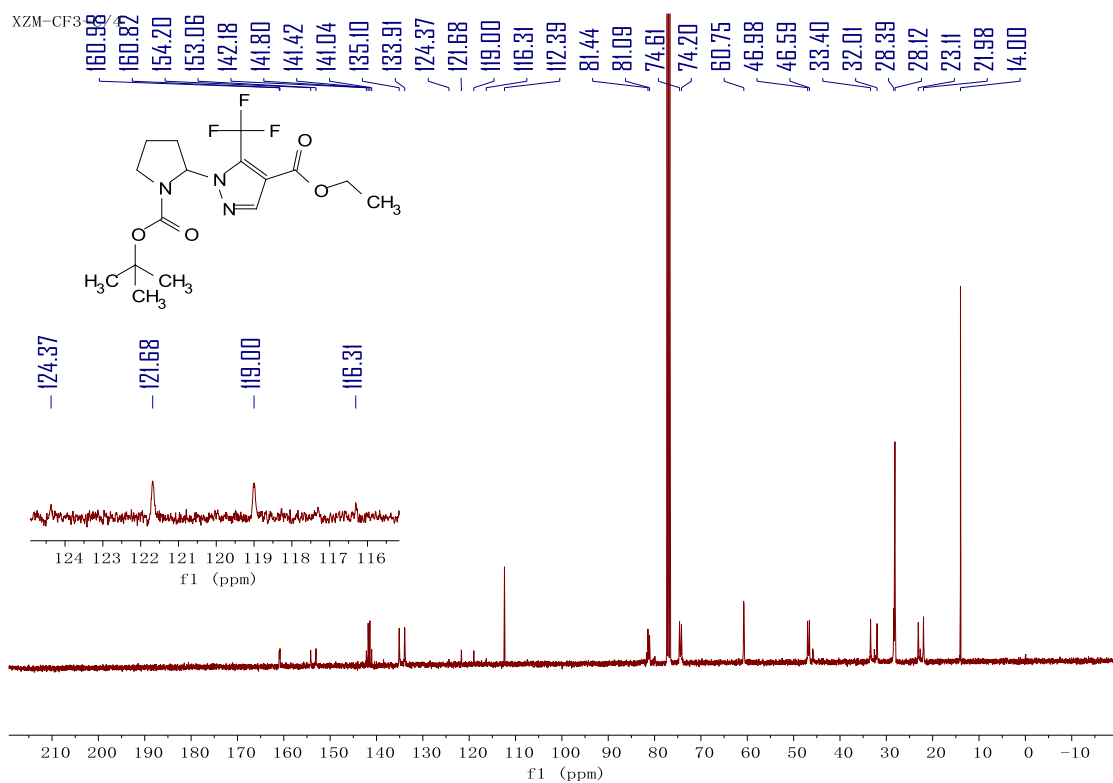

### 3s (rotameric mixture)

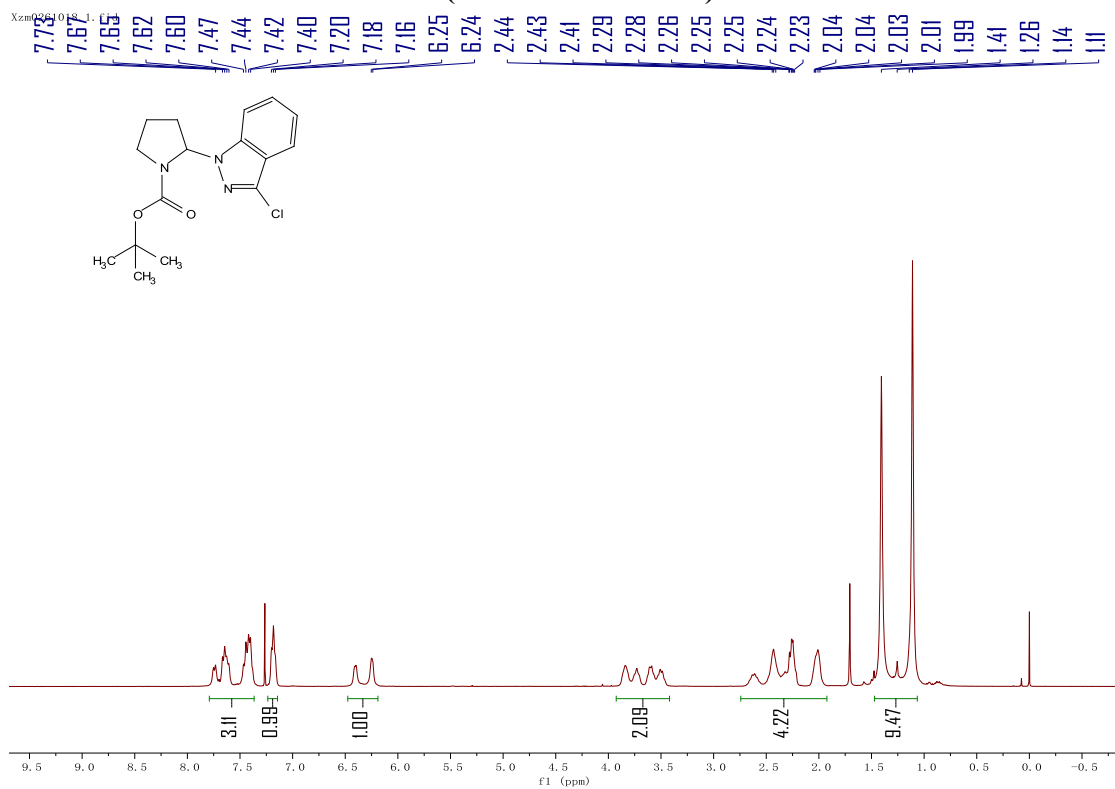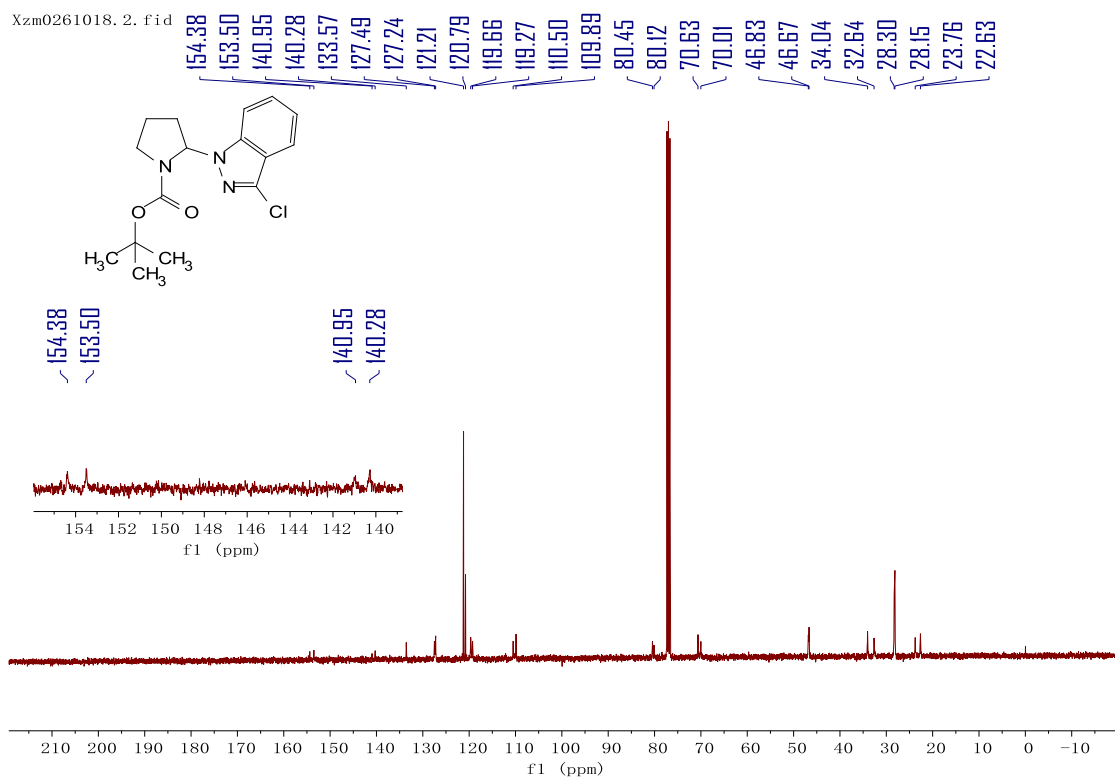

[illegible]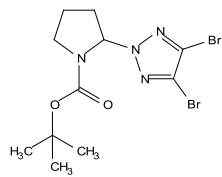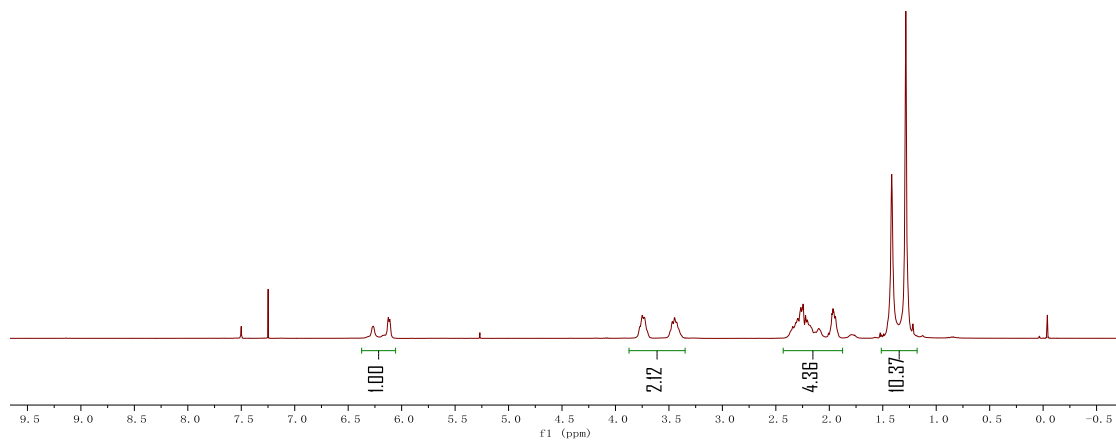

sxq-6-64-c  
 single pulse decoupled gated NOE

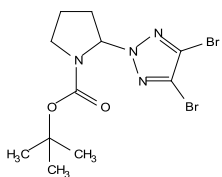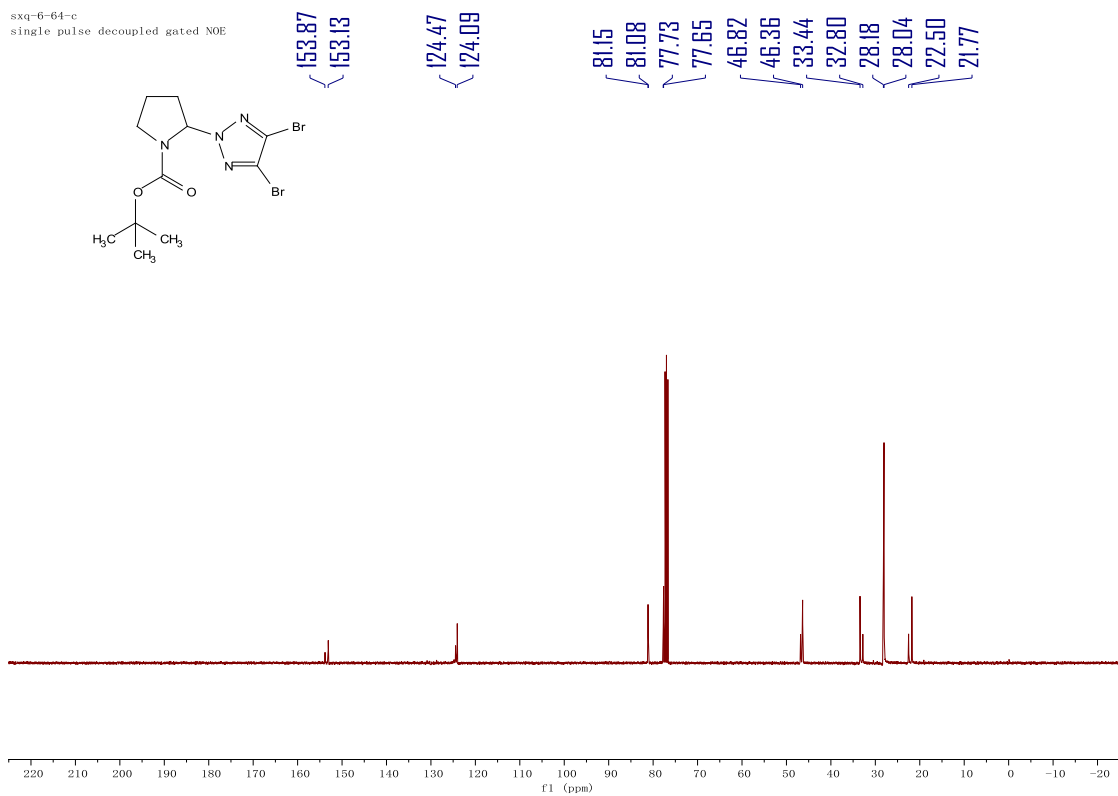

### 3u (rotameric mixture)

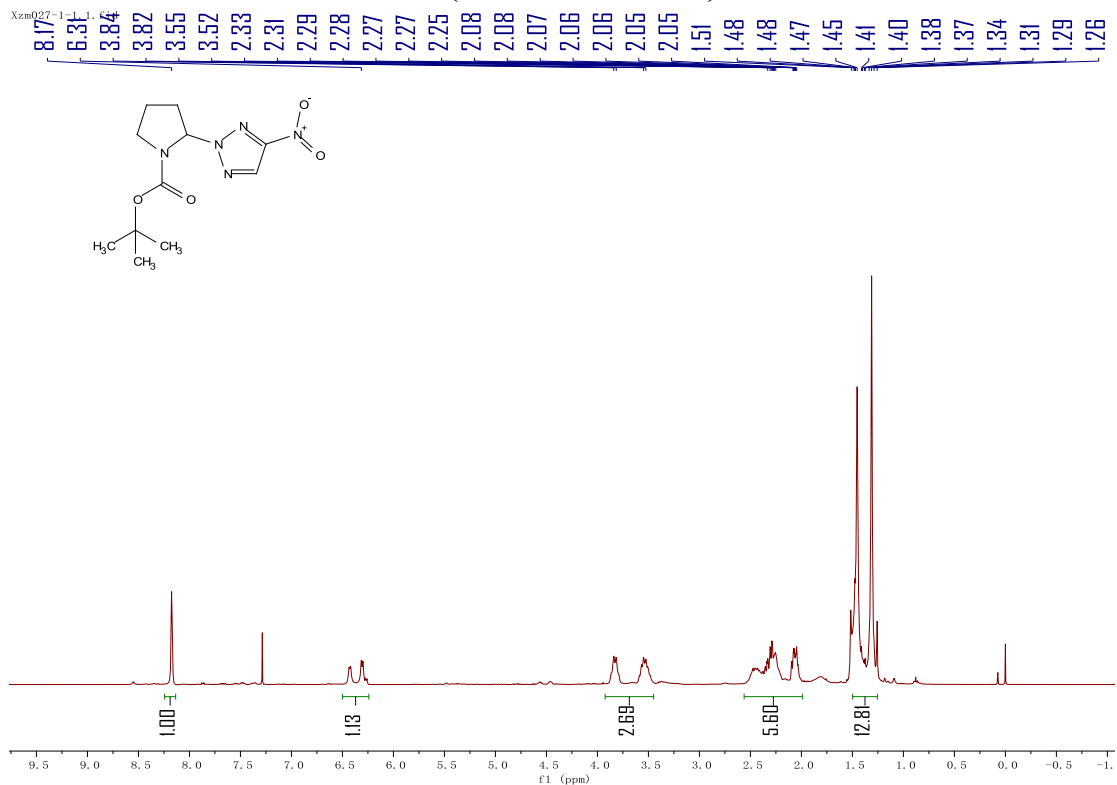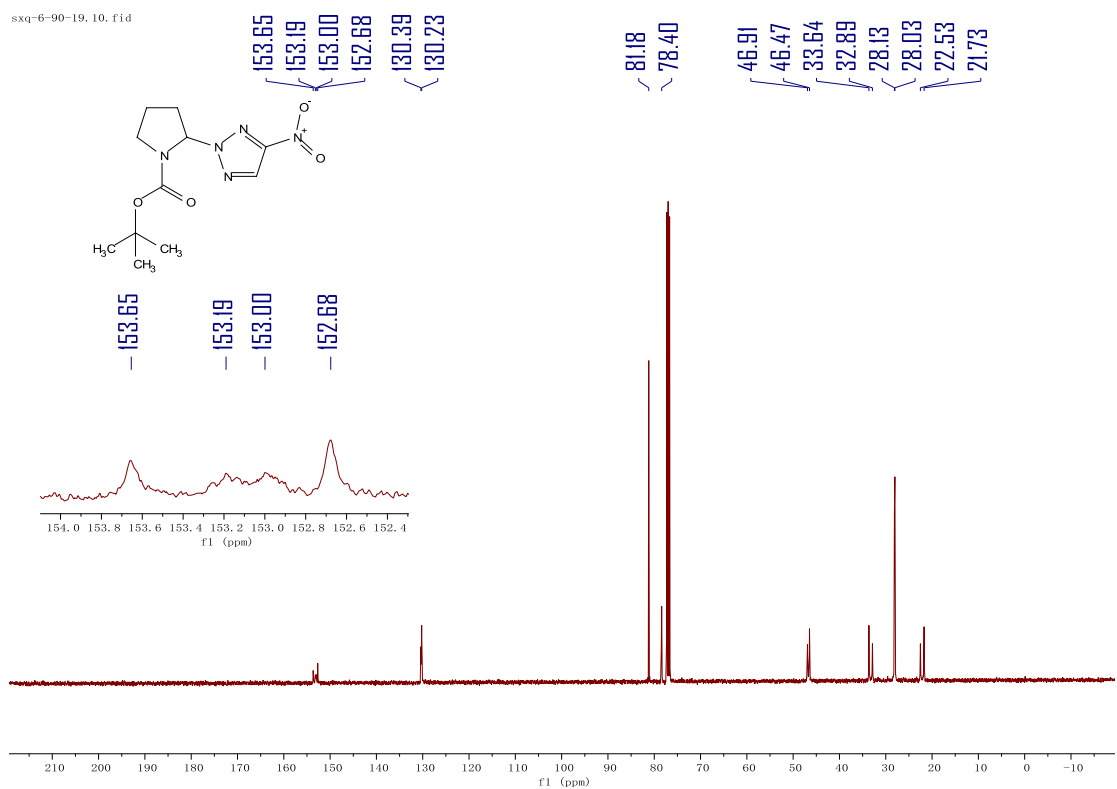

### 3v (rotameric mixture)

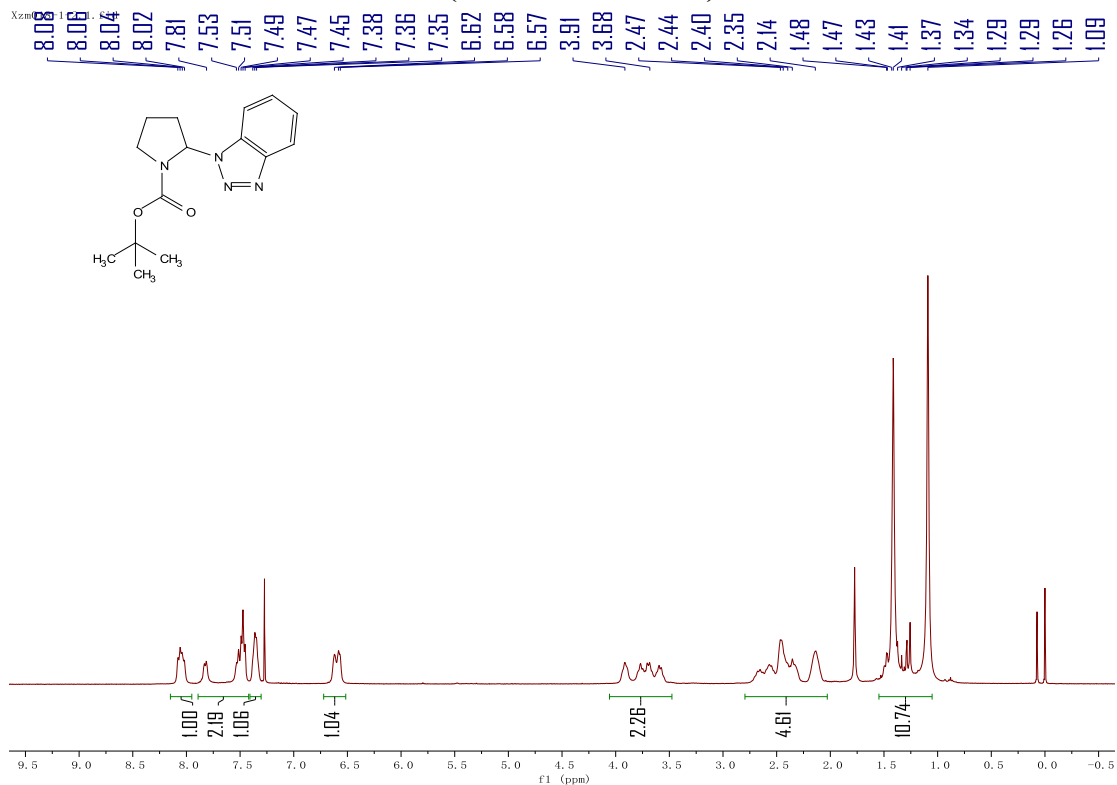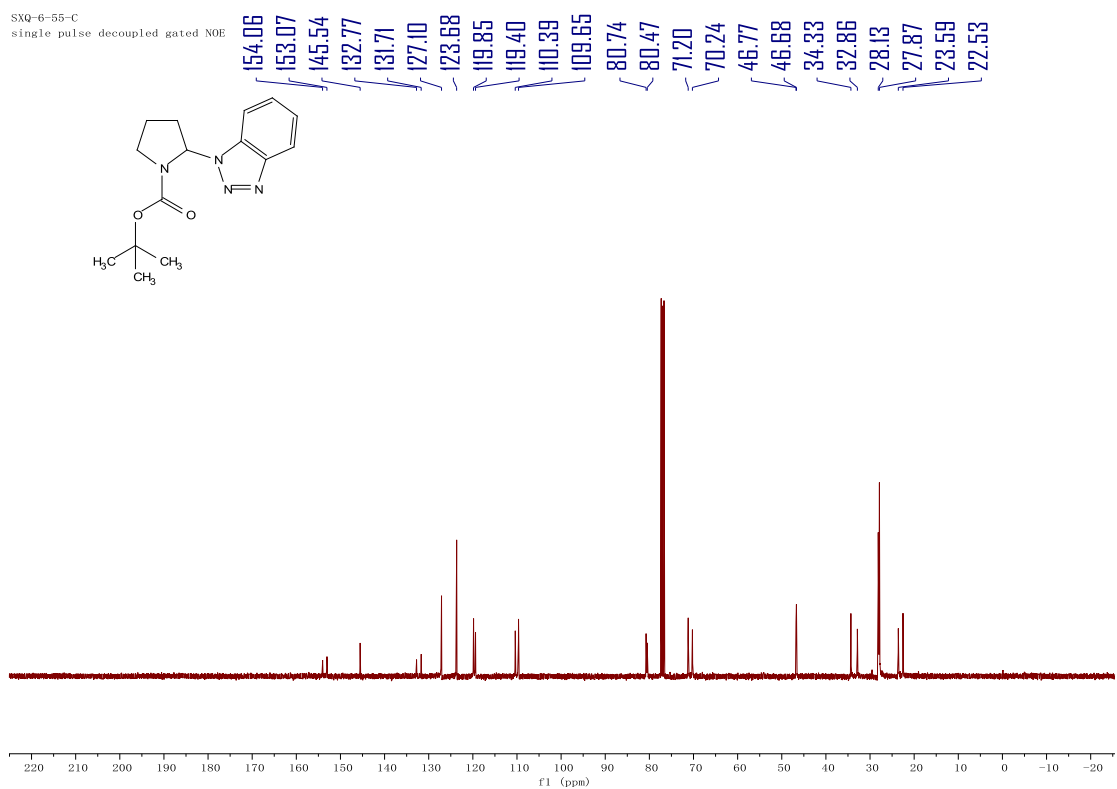

### 3w (rotameric mixture)

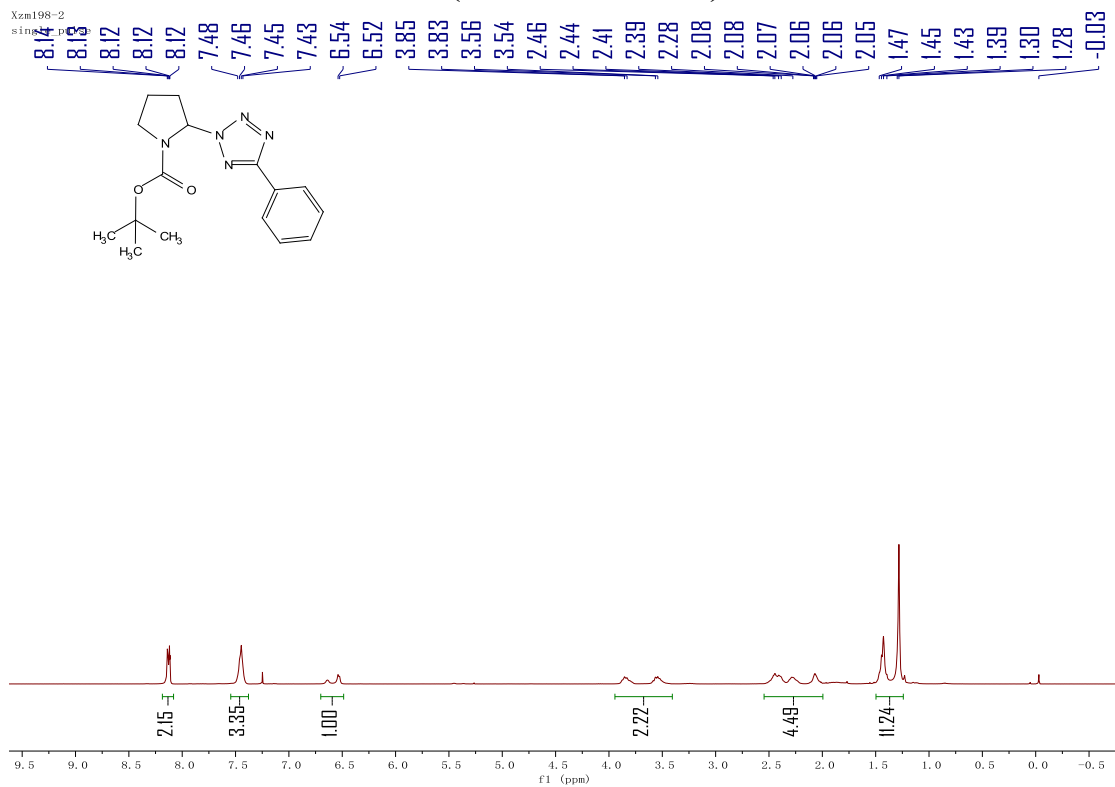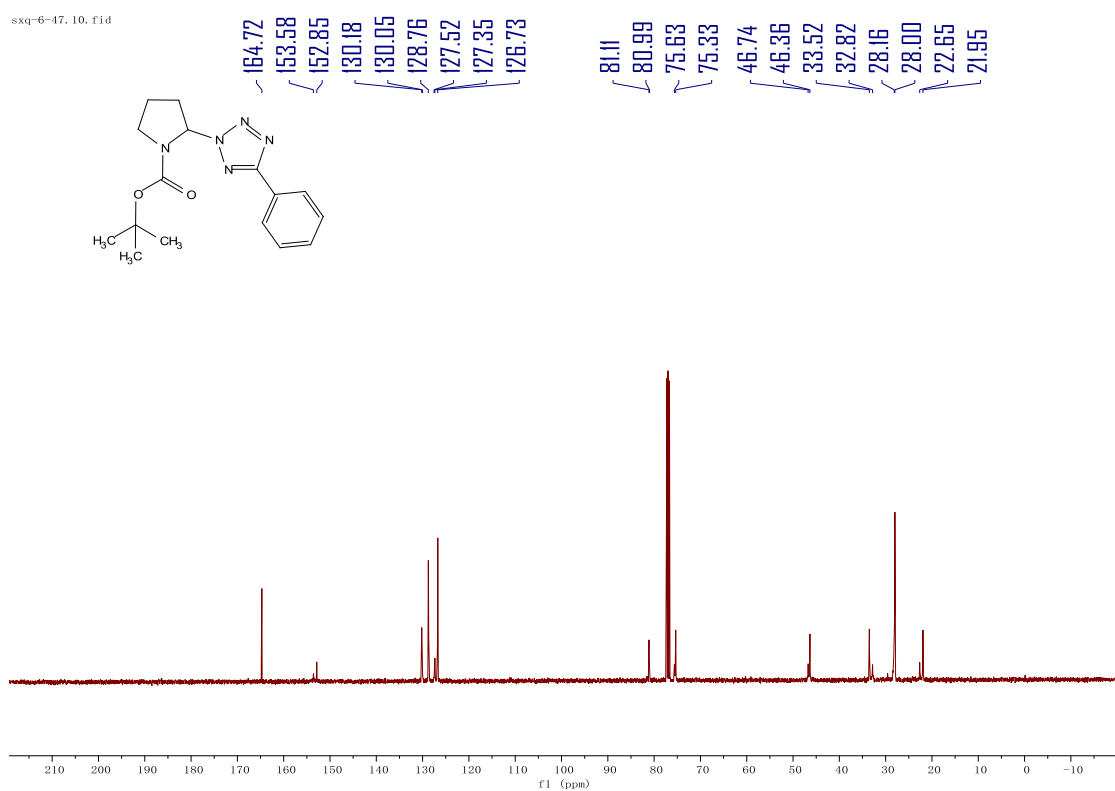

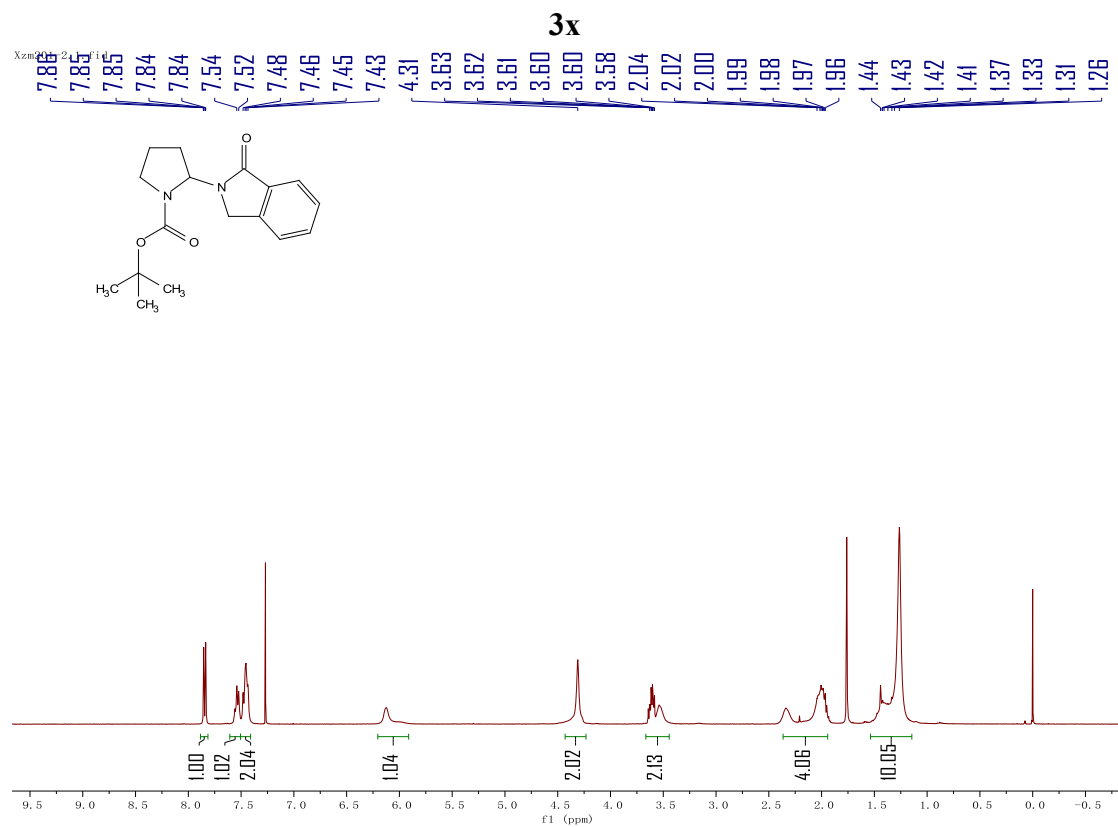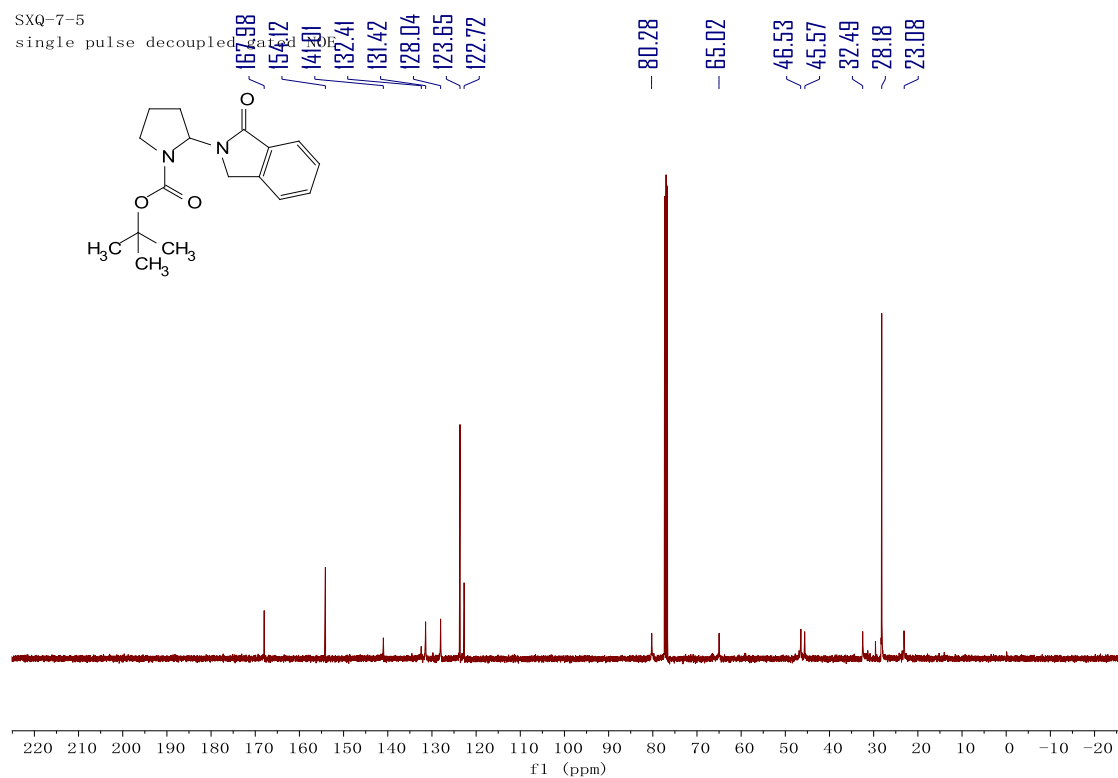

### 3y (rotameric mixture)

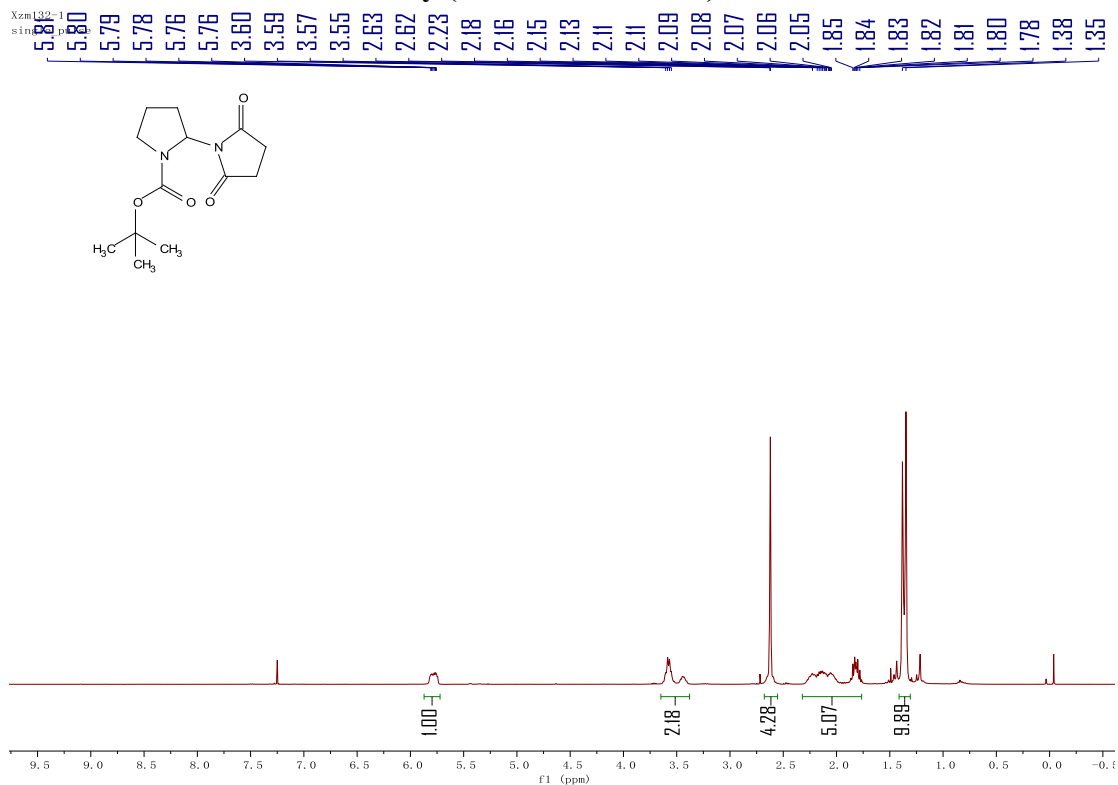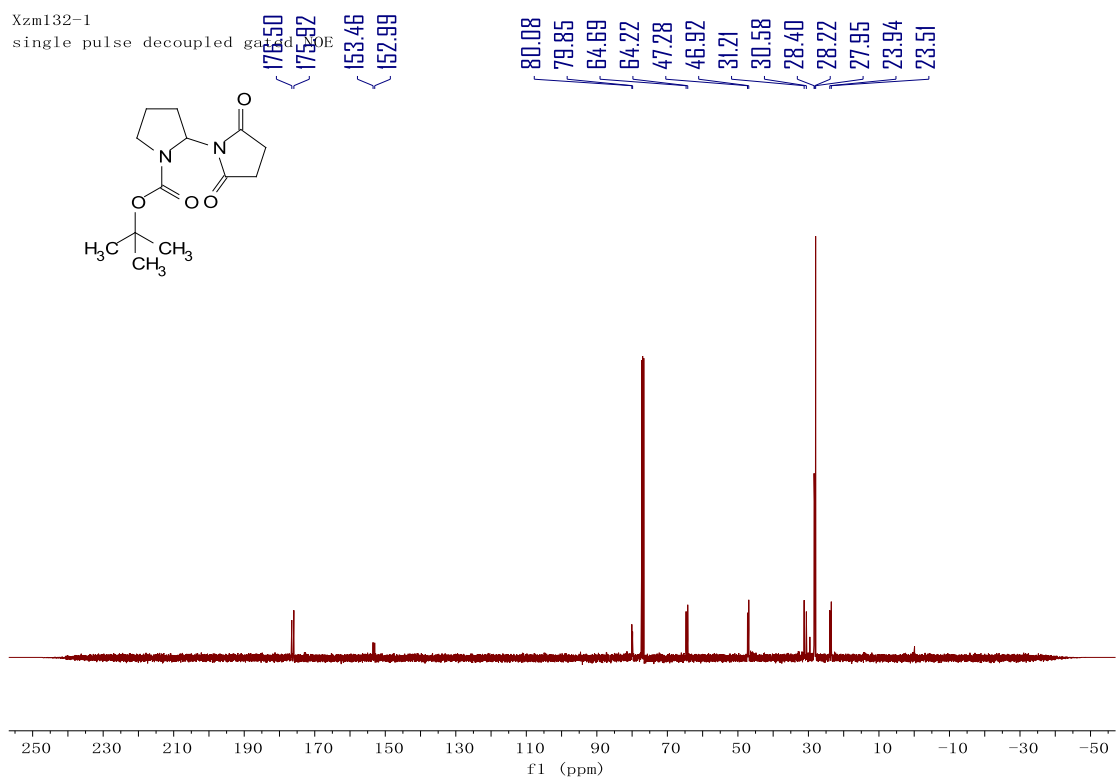

### 3z (rotameric mixture)

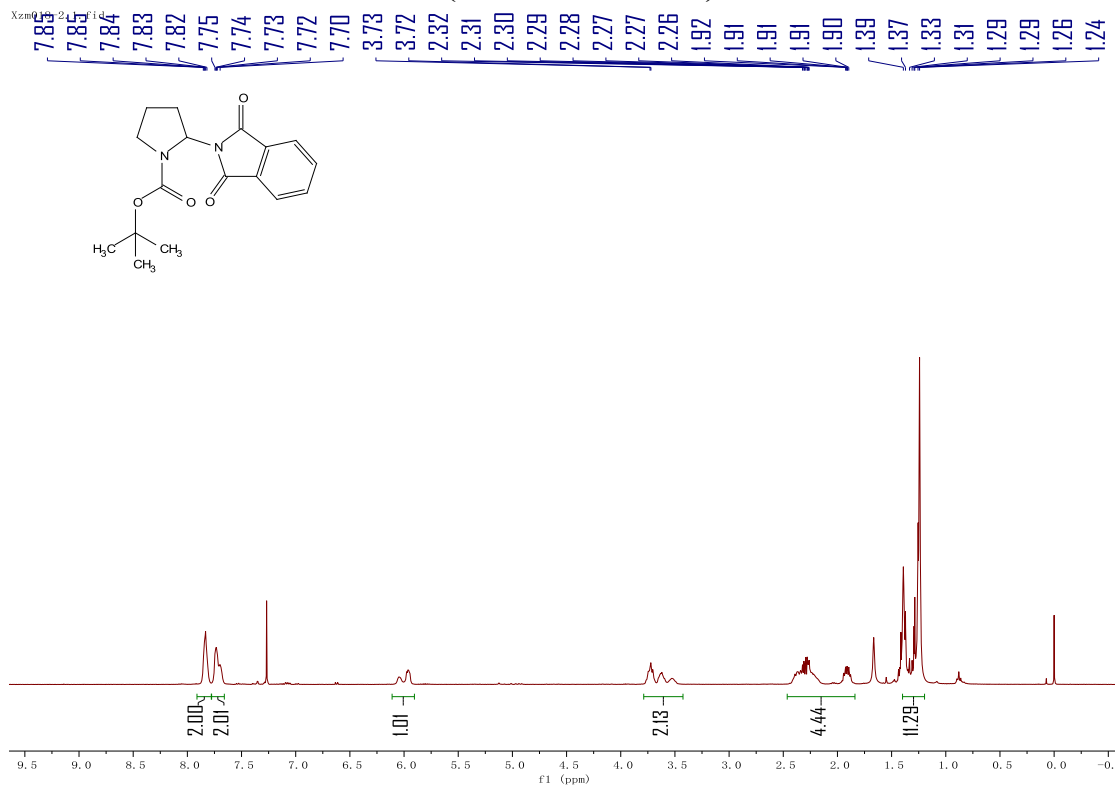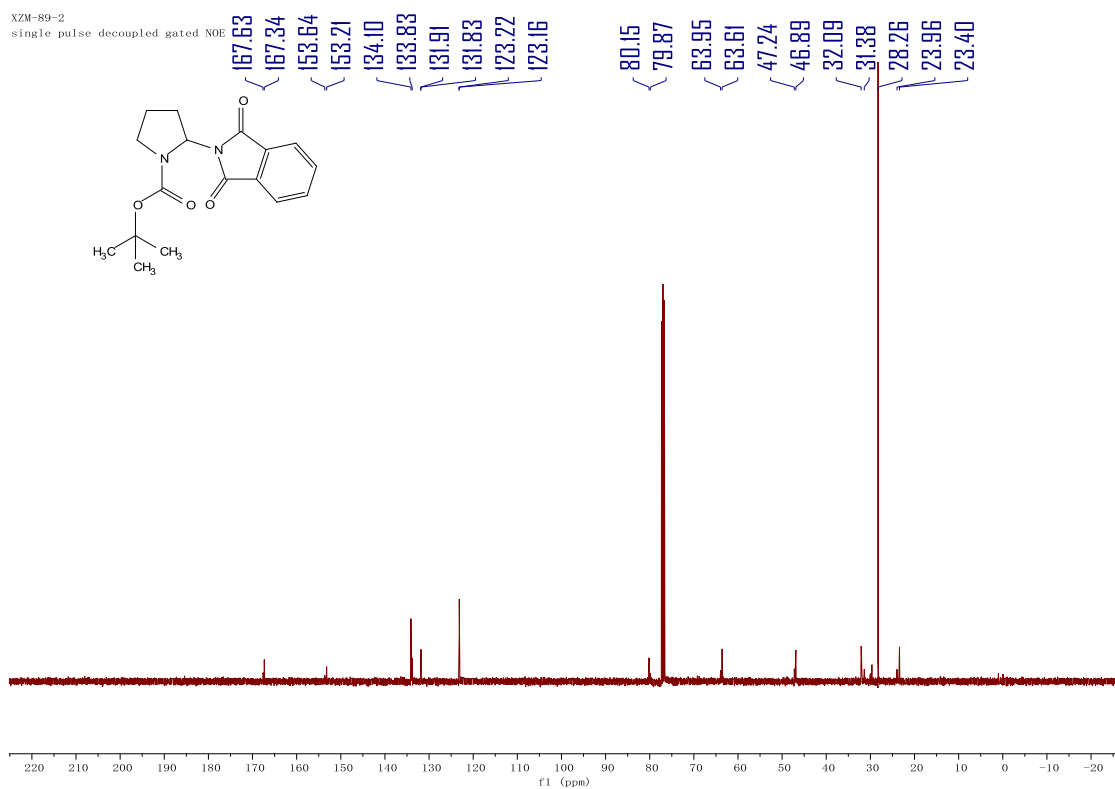

### 3aa (rotameric mixture)

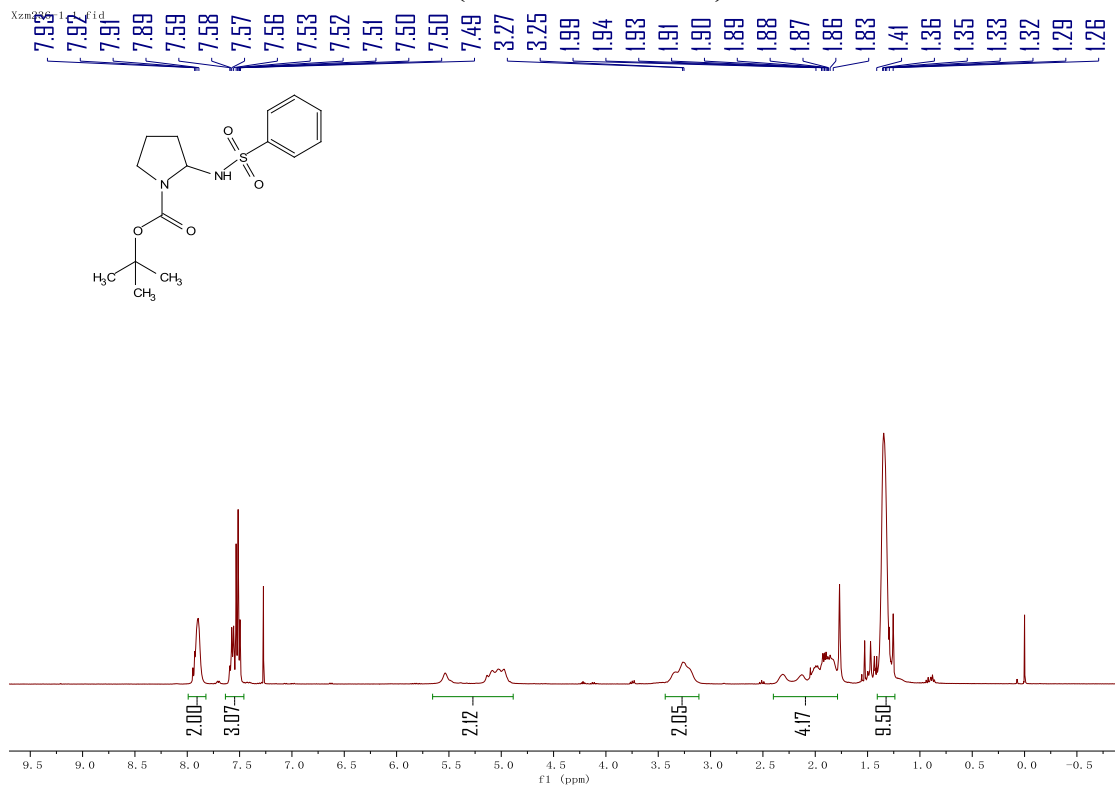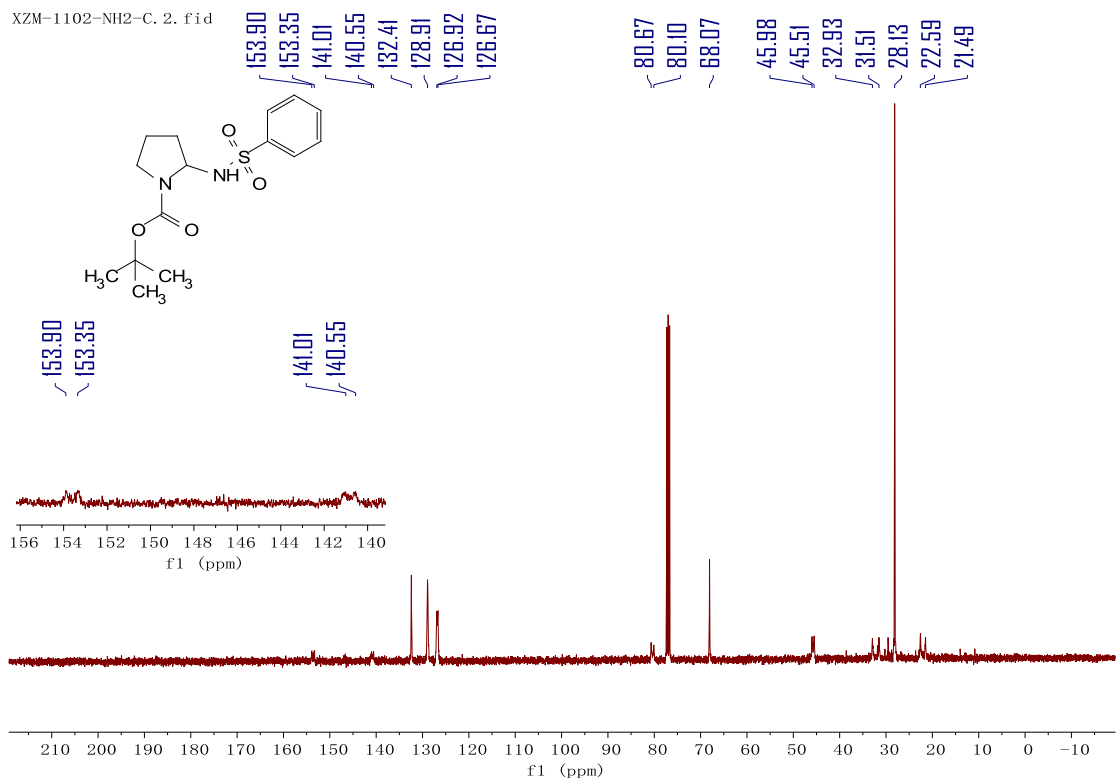

### 3ab (rotameric mixture)

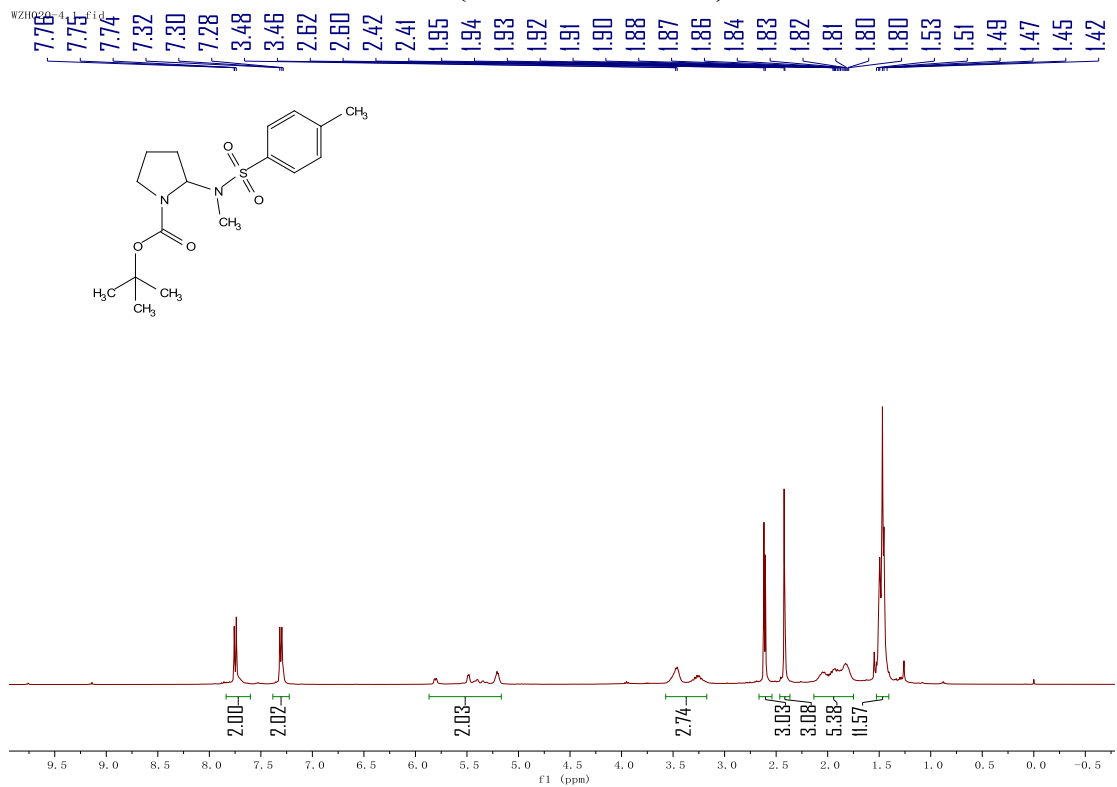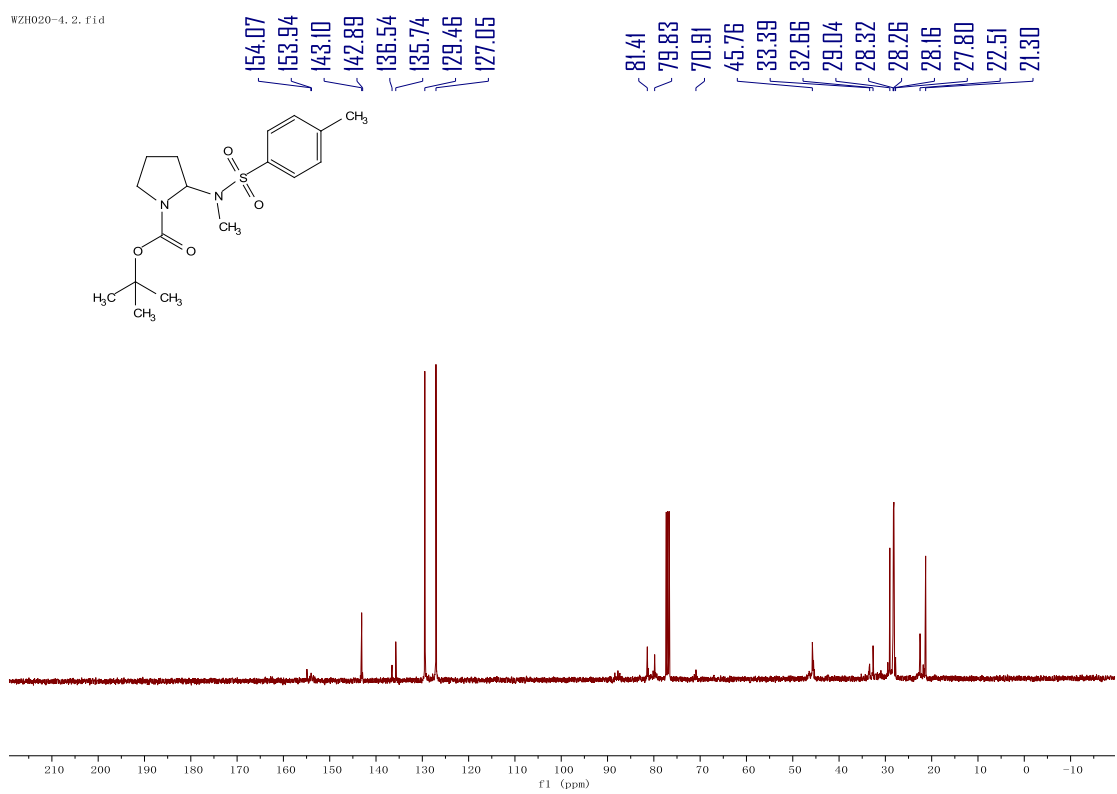

### 3ac (rotameric mixture)

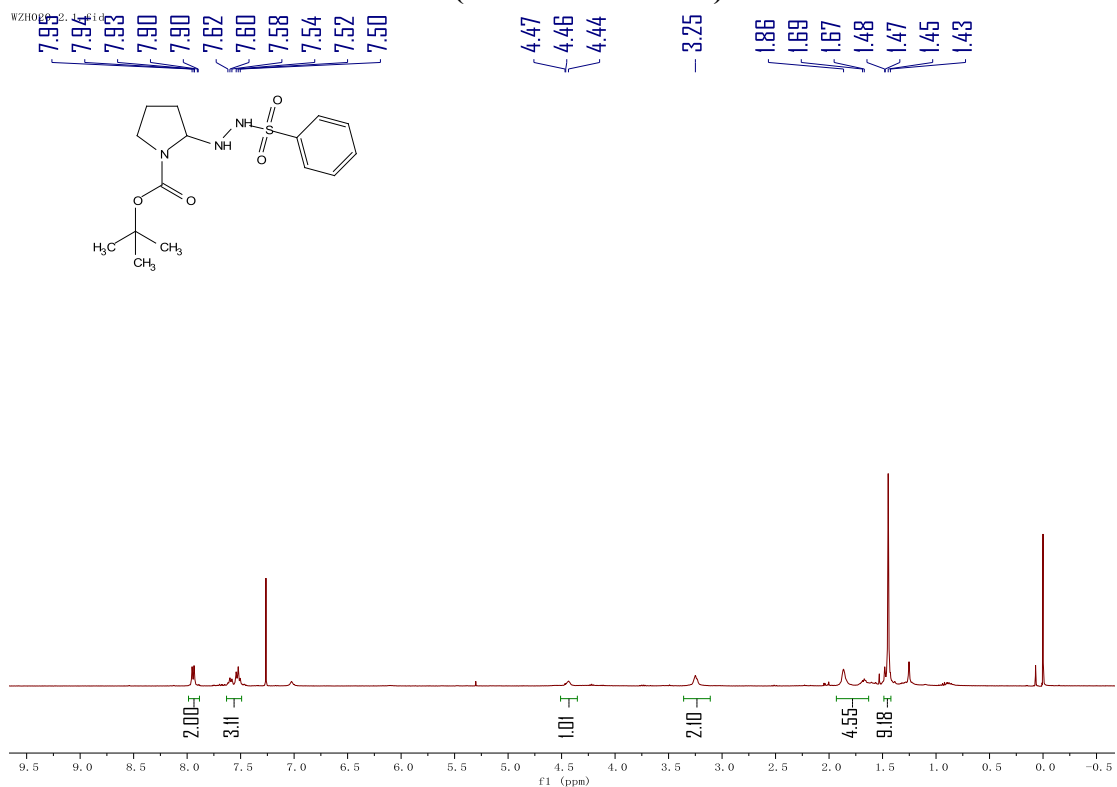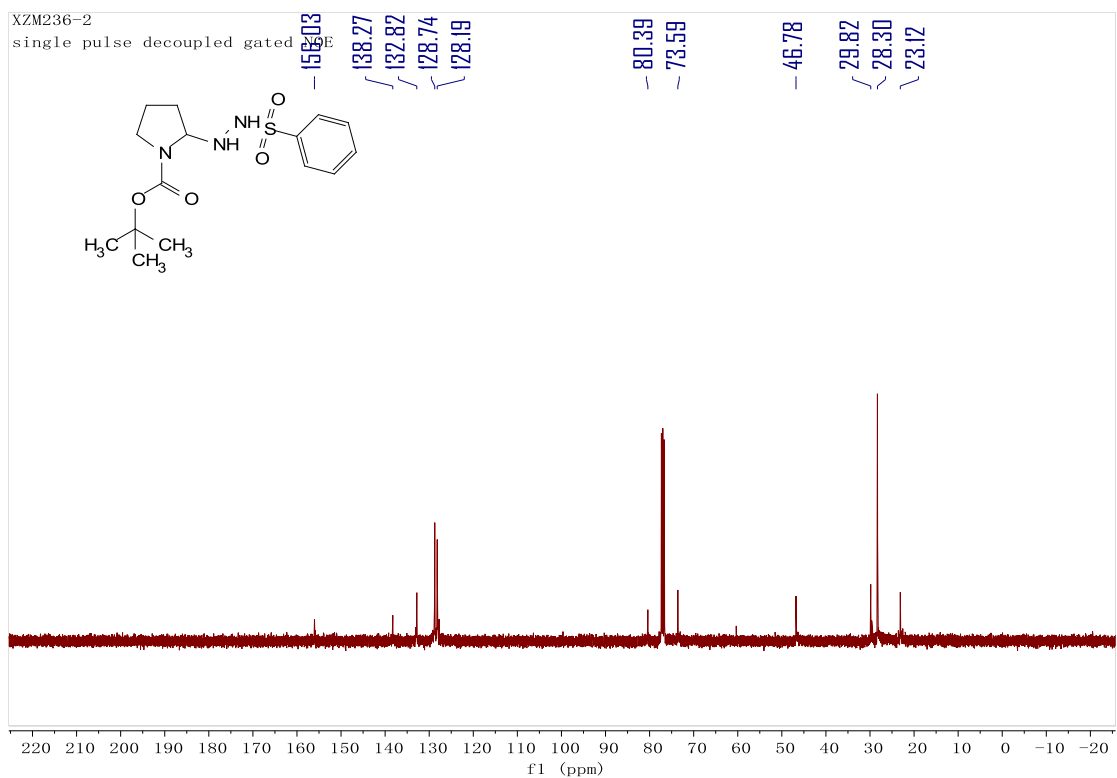

# 3ad (rotameric mixture)

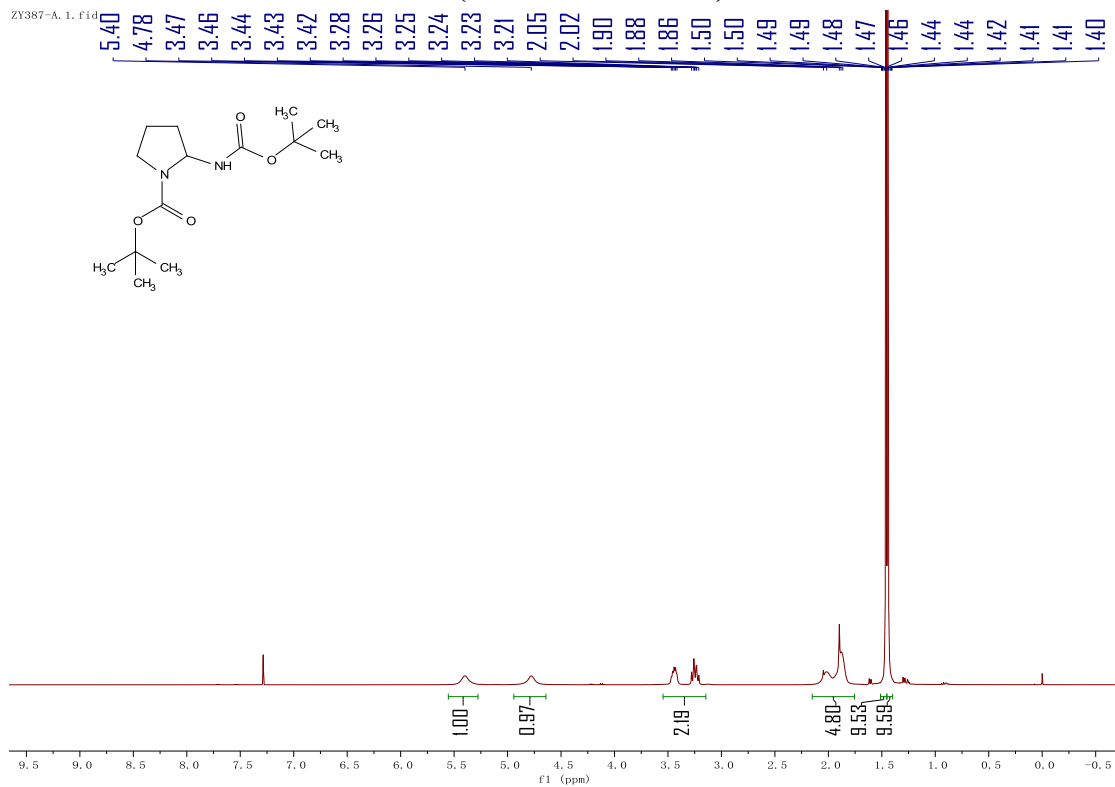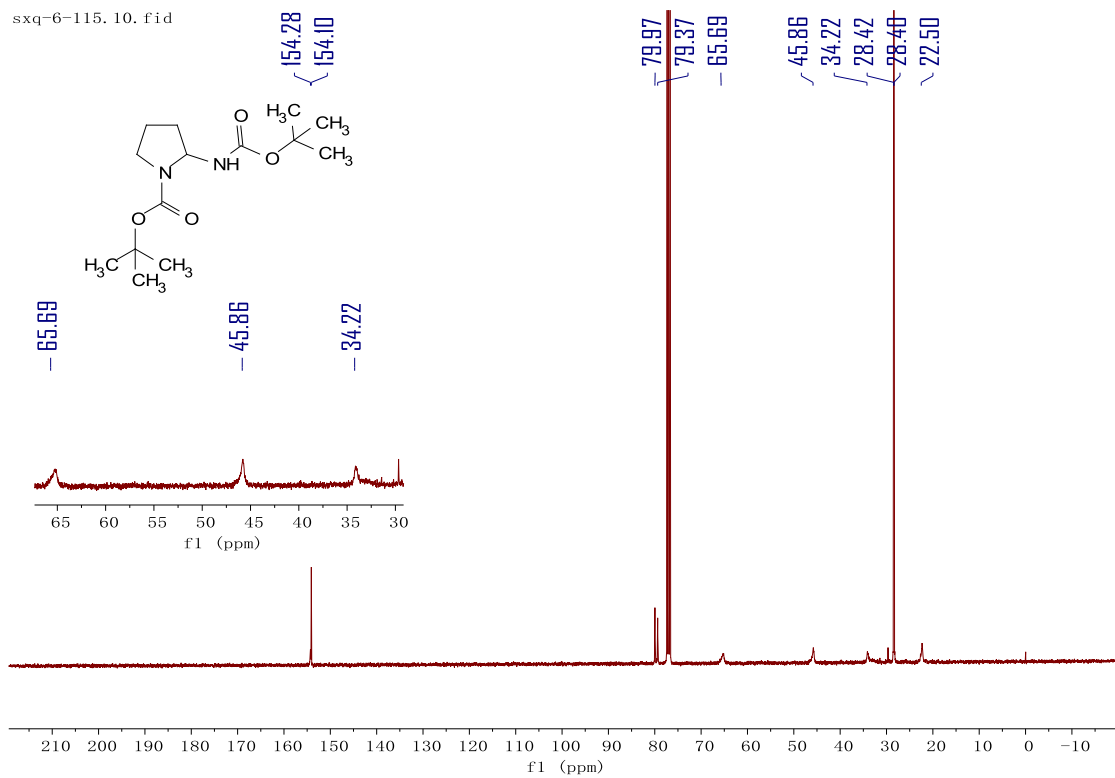

### 3ae (anomeric mixtures $\alpha:\beta = 5:1$ )

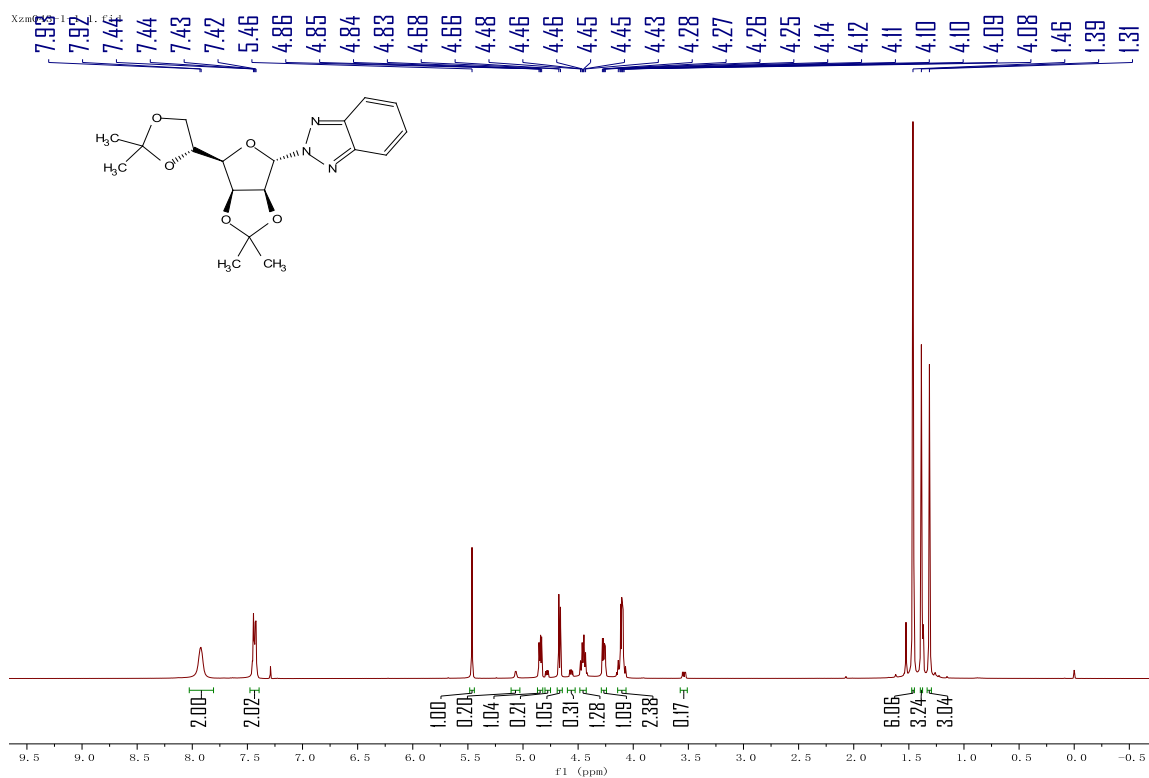

xzm-43-1-1, 2. f1d

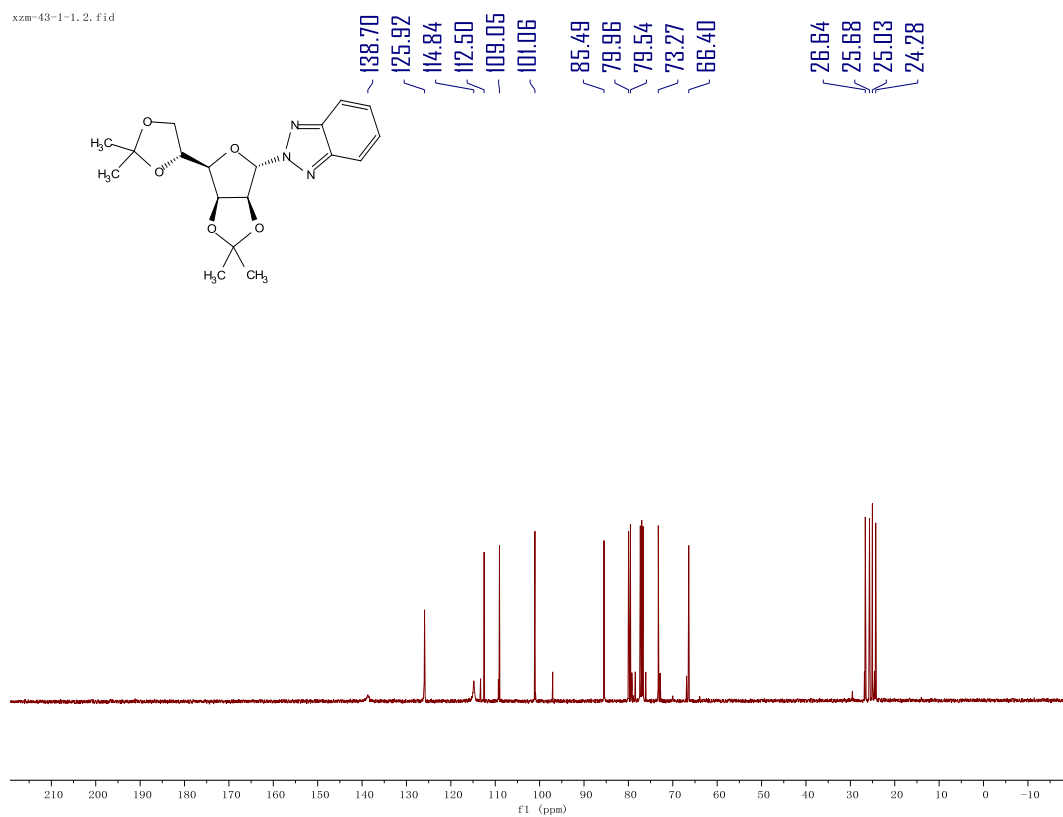

**3af** (anomeric mixtures  $\alpha:\beta = 10:1$ )

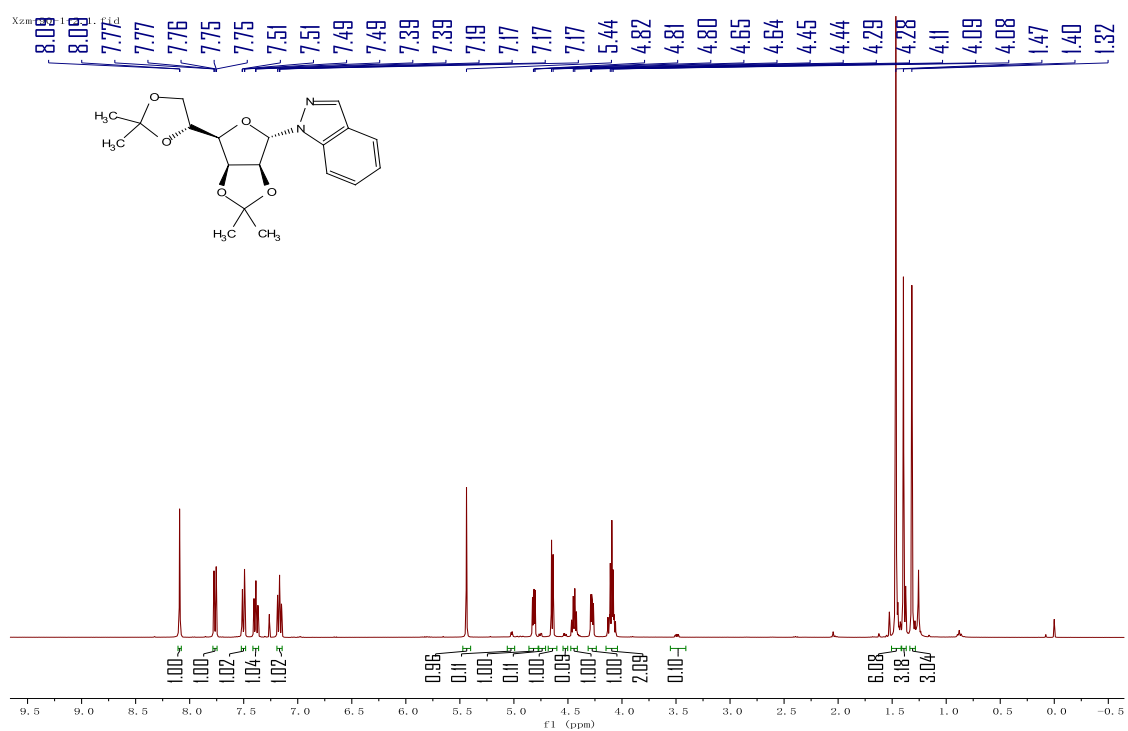

90-1-2  
single pulse decoupled gated NOE

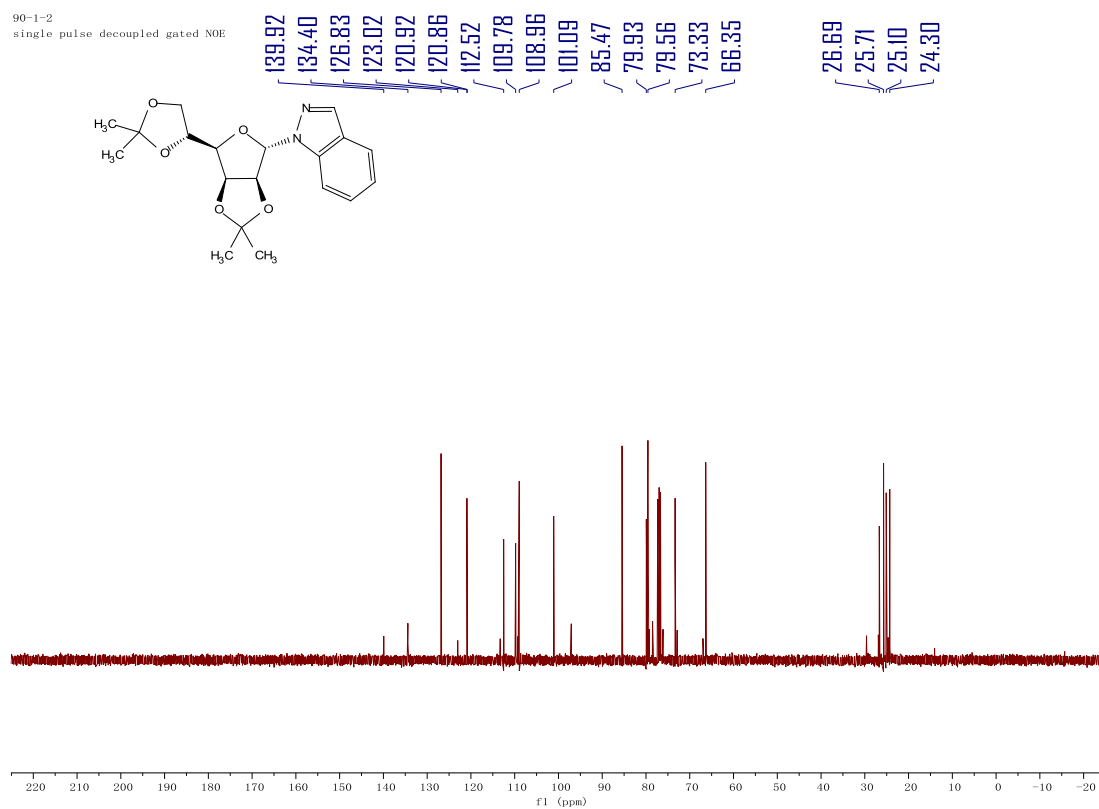

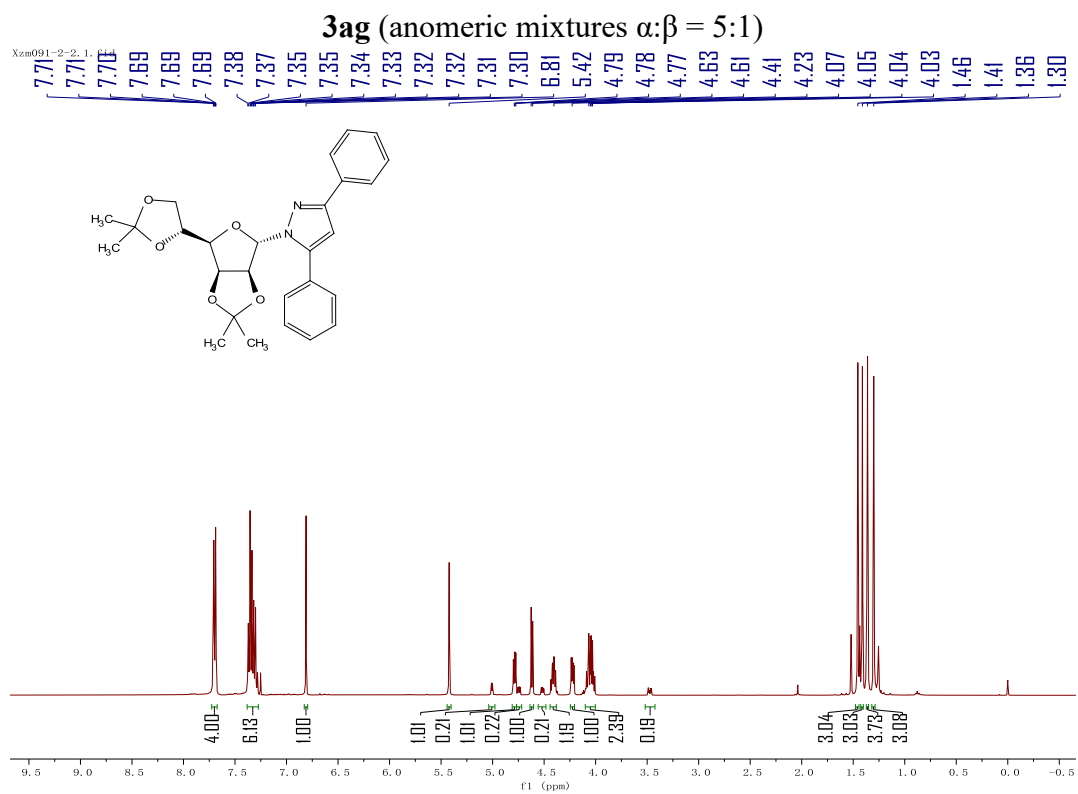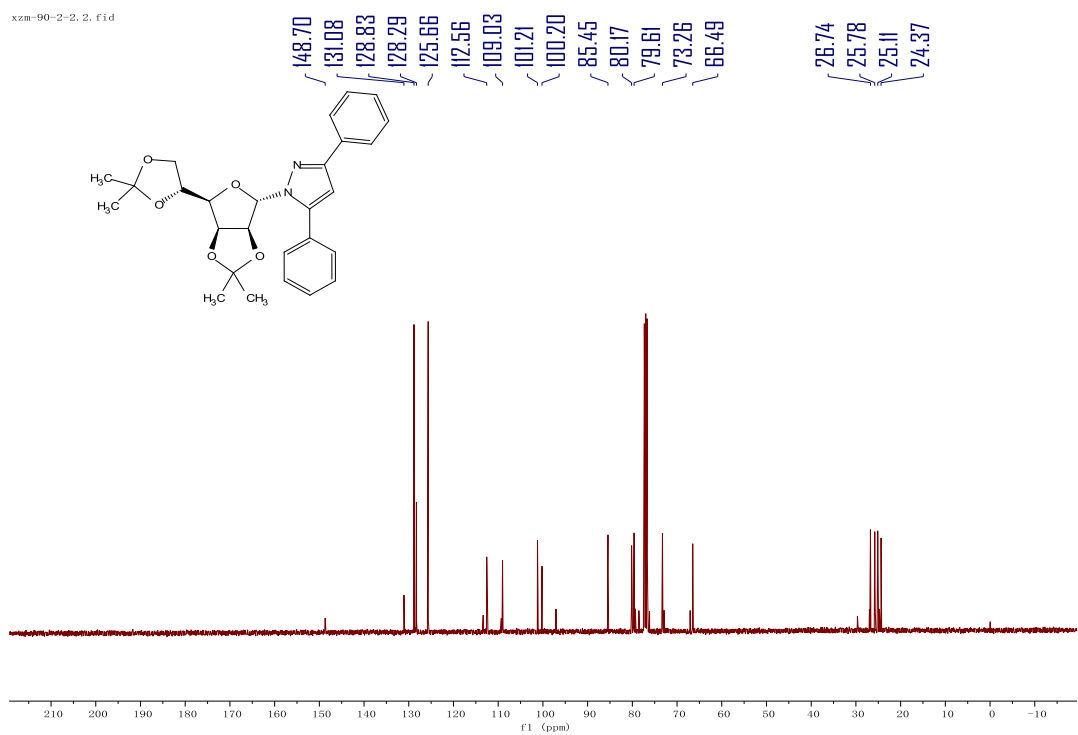

Supplement: c9cc08622f1.pdf [file c9cc08622f1.pdf]
